# Supplementary material
Source: publisher figshare collection journal article supplement (https://acs.figshare.com/ndownloader/files/4196539)
Supplement: Supplementary file 4 [file 4196539]

Archive with 19 entries (18 files):
- jo202201w_si_002/Cpd 10a.cif
- jo202201w_si_002/Cpd 10a_checkcif.pdf
- jo202201w_si_002/Cpd 2d.cif
- jo202201w_si_002/Cpd 2d_checkcif.pdf
- jo202201w_si_002/Cpd 3b.cif
- jo202201w_si_002/Cpd 3b_checkcif.pdf
- jo202201w_si_002/Cpd 3c.cif
- jo202201w_si_002/Cpd 3c_checkcif.pdf
- jo202201w_si_002/Cpd 4c.cif
- jo202201w_si_002/Cpd 4c_checkcif.pdf
- jo202201w_si_002/Cpd 5b.cif
- jo202201w_si_002/Cpd 5b_checkcif.pdf
- jo202201w_si_002/Cpd 5c.cif
- jo202201w_si_002/Cpd 5c_checkcif.pdf
- jo202201w_si_002/Cpd 7c.cif
- jo202201w_si_002/Cpd 7c_checkcif.pdf
- jo202201w_si_002/Cpd 8.cif
- jo202201w_si_002/Cpd 8_checkcif.pdf
- jo202201w_si_002/
