# Supplementary material
Source: publisher figshare collection journal article supplement (https://acs.figshare.com/ndownloader/files/4196539)
Supplement: Supplementary file 4 [file 4196539 › jo202201w_si_002/Cpd 2d.cif]

data_MHCJMA

_nottingham_internal_coll_name         MHCJMA
_nottingham_internal_coll_number       9949 
_nottingham_internal_coll_client       MH/CJM 
_nottingham_internal_coll_type         custom 
_nottingham_internal_coll_frame_time   '2 and 8s' 
_nottingham_internal_coll_frame_width  '1 degree' 
_nottingham_internal_coll_frame_method '\w scans' 
_nottingham_internal_coll_user         AJB 
_nottingham_internal_coll_date         26/11/2010 
_nottingham_internal_process_user      WL 
_nottingham_internal_process_date      30/11/2010 
_nottingham_internal_solution_user     wl 
_nottingham_internal_solution_date     30/11/2010 
_nottingham_internal_refinement_user   wl 
_nottingham_internal_refinement_date   4/2/2011 
_nottingham_internal_validation_user   wl 
_nottingham_internal_validation_date   24/3/2011 
_nottingham_internal_archive_date      24/3/2011 

_refine_special_details 
; 
Hydrogen atoms were located in the difference map and placed in 
calculated positions. CH3 and OH hydrogens were refined as rigid rotors, 
while the N-H distance was restrained to 0.86\%A, but the postion of this 
hydrogen otherwise allowed to freely refine.
; 
 
_audit_creation_method            'enCIFer editing of SHELXL-97 created file' 
_chemical_name_systematic         
; 
 ? 
; 
_chemical_name_common             ? 
_chemical_melting_point           ? 
_chemical_formula_moiety          ?  
_chemical_formula_sum             
'C13 H13 Br F3 N O5' 
_chemical_formula_weight          400.15 
 
loop_ 
 _atom_type_symbol 
 _atom_type_description 
 _atom_type_scat_dispersion_real 
 _atom_type_scat_dispersion_imag 
 _atom_type_scat_source 
 'C'  'C'   0.0181   0.0091 
 'International Tables Vol C Tables 4.2.6.8 and 6.1.1.4' 
 'H'  'H'   0.0000   0.0000 
 'International Tables Vol C Tables 4.2.6.8 and 6.1.1.4' 
 'N'  'N'   0.0311   0.0180 
 'International Tables Vol C Tables 4.2.6.8 and 6.1.1.4' 
 'O'  'O'   0.0492   0.0322 
 'International Tables Vol C Tables 4.2.6.8 and 6.1.1.4' 
 'F'  'F'   0.0727   0.0534 
 'International Tables Vol C Tables 4.2.6.8 and 6.1.1.4' 
 'Br'  'Br'  -0.6763   1.2805 
 'International Tables Vol C Tables 4.2.6.8 and 6.1.1.4'  
 
_symmetry_cell_setting            triclinic 
_symmetry_space_group_name_H-M    'P -1' 
_symmetry_space_group_name_Hall   '-P 1' 
 
loop_ 
 _symmetry_equiv_pos_as_xyz 
 'x, y, z' 
 '-x, -y, -z'  
 
_cell_length_a                    7.1571(4) 
_cell_length_b                    8.4227(4) 
_cell_length_c                    13.3083(8) 
_cell_angle_alpha                 98.186(5) 
_cell_angle_beta                  100.888(5) 
_cell_angle_gamma                 96.356(4) 
_cell_volume                      771.93(7) 
_cell_formula_units_Z             2 
_cell_measurement_temperature     150(2) 
_cell_measurement_reflns_used     3028 
_cell_measurement_theta_min       3.43 
_cell_measurement_theta_max       72.6 

_exptl_crystal_description        lath 
_exptl_crystal_colour             colourless 
_exptl_crystal_size_max           0.5881 
_exptl_crystal_size_mid           0.1945 
_exptl_crystal_size_min           0.0490 
_exptl_crystal_density_meas       ? 
_exptl_crystal_density_diffrn     1.722 
_exptl_crystal_density_method     ? 
_exptl_crystal_F_000              400 
_exptl_absorpt_coefficient_mu     4.188 
_exptl_absorpt_correction_T_min   0.378 
_exptl_absorpt_correction_T_max   1.217 
_exptl_absorpt_correction_type    'gaussian' 
_exptl_absorpt_process_details    
;
CrysAlisPro, Oxford Diffraction Ltd., 
Version 1.171.34.36 (release 02-08-2010 CrysAlis171 .NET) 
(compiled Jan  5 2010,16:28:46) 
Analytical numeric absorption correction using a multifaceted crystal 
model based on expressions derived by R.C. Clark & J.S. Reid. 
(Clark, R. C. & Reid, J. S. (1995). Acta Cryst. A51, 887-897) 
; 

_diffrn_ambient_temperature       150(2)
_diffrn_radiation_wavelength      1.5418
_diffrn_radiation_type            'Cu K\a'
_diffrn_radiation_source          'SuperNova (Cu) X-ray Source'
_diffrn_radiation_monochromator   'mirror'
_diffrn_measurement_device_type   'SuperNova, Single source at offset), Atlas'
_diffrn_measurement_method        '\w scans'
_diffrn_detector_area_resol_mean  10.3613
_diffrn_standards_number          0
_diffrn_standards_interval_count  .
_diffrn_standards_decay_%         0
_diffrn_reflns_number             4463 
_diffrn_reflns_av_R_equivalents   0.0149 
_diffrn_reflns_av_sigmaI/netI     0.0151 
_diffrn_reflns_limit_h_min        -8 
_diffrn_reflns_limit_h_max        6 
_diffrn_reflns_limit_k_min        -9 
_diffrn_reflns_limit_k_max        10 
_diffrn_reflns_limit_l_min        -15 
_diffrn_reflns_limit_l_max        16 
_diffrn_reflns_theta_min          3.43 
_diffrn_reflns_theta_max          72.75 
_reflns_number_total              2943 
_reflns_number_gt                 2839 
_reflns_threshold_expression      I>2\s(I) 
 
_computing_data_collection       
;
CrysAlisPro, Oxford Diffraction Ltd.,
Version 1.171.34.36 (release 02-08-2010 CrysAlis171 .NET)
(compiled Nov  6 2009,16:24:50)
; 
_computing_cell_refinement       
;
CrysAlisPro, Oxford Diffraction Ltd.,
Version 1.171.34.36 (release 02-08-2010 CrysAlis171 .NET)
(compiled Nov  6 2009,16:24:50)
; 
_computing_data_reduction        
;
CrysAlisPro, Oxford Diffraction Ltd.,
Version 1.171.34.36 (release 02-08-2010 CrysAlis171 .NET)
(compiled Nov  6 2009,16:24:50)
; 
_computing_structure_solution    'SHELXS97 (Sheldrick, 2008)' 
_computing_structure_refinement  'SHELXL97 (Sheldrick, 2008)' 
_computing_molecular_graphics    ' ? ' 
_computing_publication_material  'enCIFer(Allen et al.,2004);PLATON(Spek,2003)' 

_refine_ls_structure_factor_coef  Fsqd  
_refine_ls_matrix_type            full 
_refine_ls_weighting_scheme       calc  
_refine_ls_weighting_details      
'calc w=1/[\s^2^(Fo^2^)+(0.0439P)^2^+0.4133P] where P=(Fo^2^+2Fc^2^)/3'
_atom_sites_solution_primary      direct 
_atom_sites_solution_secondary    difmap 
_atom_sites_solution_hydrogens    geom
_refine_ls_hydrogen_treatment     mixed
_refine_ls_extinction_method      none 
_refine_ls_extinction_coef        ?  
_refine_ls_number_reflns          2943 
_refine_ls_number_parameters      214 
_refine_ls_number_restraints      1 
_refine_ls_R_factor_all           0.0288 
_refine_ls_R_factor_gt            0.0280 
_refine_ls_wR_factor_ref          0.0748 
_refine_ls_wR_factor_gt           0.0744 
_refine_ls_goodness_of_fit_ref    1.062 
_refine_ls_restrained_S_all       1.062 
_refine_ls_shift/su_max           0.002 
_refine_ls_shift/su_mean          0.000 
 
loop_ 
 _atom_site_label 
 _atom_site_type_symbol 
 _atom_site_fract_x 
 _atom_site_fract_y 
 _atom_site_fract_z 
 _atom_site_U_iso_or_equiv 
 _atom_site_adp_type 
 _atom_site_occupancy 
 _atom_site_symmetry_multiplicity 
 _atom_site_calc_flag 
 _atom_site_refinement_flags 
 _atom_site_disorder_assembly 
 _atom_site_disorder_group 
Br1 Br 0.72952(3) 0.36059(3) 1.030607(15) 0.03991(10) Uani 1 1 d . . . 
C1 C 0.1412(2) 0.11949(19) 0.36172(13) 0.0177(3) Uani 1 1 d . . . 
C2 C 0.0796(2) 0.25788(18) 0.43006(12) 0.0154(3) Uani 1 1 d . . . 
H2 H 0.1260 0.3613 0.4113 0.018 Uiso 1 1 calc R . . 
C3 C -0.1431(2) 0.23977(18) 0.41550(12) 0.0154(3) Uani 1 1 d . . . 
C4 C -0.2353(2) 0.2749(2) 0.30778(13) 0.0204(3) Uani 1 1 d . . . 
C5 C 0.2156(3) 0.0364(2) 0.19891(15) 0.0289(4) Uani 1 1 d . . . 
H5A H 0.1165 -0.0572 0.1819 0.035 Uiso 1 1 calc R . . 
H5B H 0.3364 0.0024 0.2283 0.035 Uiso 1 1 calc R . . 
C6 C 0.2326(3) 0.1084(3) 0.10341(15) 0.0355(4) Uani 1 1 d . . . 
H6B H 0.2619 0.0281 0.0521 0.053 Uiso 1 1 calc R . . 
H6C H 0.3335 0.1990 0.1210 0.053 Uiso 1 1 calc R . . 
H6A H 0.1133 0.1441 0.0762 0.053 Uiso 1 1 calc R . . 
C7 C 0.3537(2) 0.29113(19) 0.56903(13) 0.0178(3) Uani 1 1 d . . . 
C8 C 0.4389(2) 0.30614(19) 0.68150(13) 0.0184(3) Uani 1 1 d . . . 
C9 C 0.6235(2) 0.3903(2) 0.71833(15) 0.0265(4) Uani 1 1 d . . . 
H9 H 0.6886 0.4354 0.6726 0.032 Uiso 1 1 calc R . . 
C10 C 0.7111(3) 0.4079(2) 0.82167(15) 0.0295(4) Uani 1 1 d . . . 
H10 H 0.8342 0.4648 0.8461 0.035 Uiso 1 1 calc R . . 
C11 C 0.6119(3) 0.3391(2) 0.88824(13) 0.0254(4) Uani 1 1 d . . . 
C12 C 0.4284(3) 0.2543(2) 0.85385(14) 0.0276(4) Uani 1 1 d . . . 
H12 H 0.3641 0.2089 0.8997 0.033 Uiso 1 1 calc R . . 
C13 C 0.3425(2) 0.2383(2) 0.74991(14) 0.0223(3) Uani 1 1 d . . . 
H13 H 0.2193 0.1816 0.7257 0.027 Uiso 1 1 calc R . . 
F1 F -0.41774(14) 0.29618(14) 0.30416(9) 0.0305(2) Uani 1 1 d . . . 
F2 F -0.14467(16) 0.41034(13) 0.28591(8) 0.0288(2) Uani 1 1 d . . . 
F3 F -0.23356(15) 0.15476(13) 0.23066(8) 0.0282(2) Uani 1 1 d . . . 
N1 N 0.16125(19) 0.25760(16) 0.53787(11) 0.0161(3) Uani 1 1 d D . . 
H1 H 0.088(3) 0.267(2) 0.5797(15) 0.019 Uiso 1 1 d D . . 
O1 O 0.15996(18) -0.01265(15) 0.38483(10) 0.0238(3) Uani 1 1 d . . . 
O2 O -0.22757(16) 0.08366(13) 0.41653(9) 0.0196(2) Uani 1 1 d . . . 
H2A H -0.2022 0.0632 0.4756 0.029 Uiso 1 1 calc R . . 
O3 O -0.18085(15) 0.35463(13) 0.49181(9) 0.0184(2) Uani 1 1 d . . . 
H3 H -0.2950 0.3389 0.4940 0.028 Uiso 1 1 calc R . . 
O4 O 0.45239(17) 0.30748(17) 0.50371(10) 0.0265(3) Uani 1 1 d . . . 
O5 O 0.16599(17) 0.16210(14) 0.27271(9) 0.0214(2) Uani 1 1 d . . . 
 
loop_ 
 _atom_site_aniso_label 
 _atom_site_aniso_U_11 
 _atom_site_aniso_U_22 
 _atom_site_aniso_U_33 
 _atom_site_aniso_U_23 
 _atom_site_aniso_U_13 
 _atom_site_aniso_U_12 
Br1 0.03911(15) 0.05551(17) 0.01936(13) 0.00289(9) -0.00481(9) 0.00511(10) 
C1 0.0138(7) 0.0211(8) 0.0181(8) 0.0024(6) 0.0040(6) 0.0025(6) 
C2 0.0135(7) 0.0174(7) 0.0154(7) 0.0027(6) 0.0035(6) 0.0015(5) 
C3 0.0128(7) 0.0157(7) 0.0171(8) 0.0024(6) 0.0028(6) 0.0008(5) 
C4 0.0176(8) 0.0228(8) 0.0210(8) 0.0051(6) 0.0027(6) 0.0033(6) 
C5 0.0363(10) 0.0287(9) 0.0243(9) -0.0012(7) 0.0149(8) 0.0077(7) 
C6 0.0420(11) 0.0444(11) 0.0209(9) 0.0020(8) 0.0121(8) 0.0052(9) 
C7 0.0149(7) 0.0178(7) 0.0205(8) 0.0031(6) 0.0035(6) 0.0023(6) 
C8 0.0161(7) 0.0182(7) 0.0204(8) 0.0015(6) 0.0026(6) 0.0044(6) 
C9 0.0174(8) 0.0349(9) 0.0255(9) 0.0064(7) 0.0031(7) -0.0020(7) 
C10 0.0190(8) 0.0372(10) 0.0276(10) 0.0021(8) -0.0013(7) -0.0010(7) 
C11 0.0279(9) 0.0287(9) 0.0170(8) 0.0003(7) -0.0012(7) 0.0081(7) 
C12 0.0289(9) 0.0320(9) 0.0218(9) 0.0053(7) 0.0059(7) 0.0011(7) 
C13 0.0188(8) 0.0249(8) 0.0212(8) 0.0028(6) 0.0022(6) -0.0001(6) 
F1 0.0167(5) 0.0469(6) 0.0297(6) 0.0121(5) 0.0009(4) 0.0107(4) 
F2 0.0311(5) 0.0289(5) 0.0288(6) 0.0158(4) 0.0052(4) 0.0030(4) 
F3 0.0287(5) 0.0354(6) 0.0174(5) 0.0007(4) 0.0007(4) 0.0036(4) 
N1 0.0117(6) 0.0217(6) 0.0159(6) 0.0036(5) 0.0046(5) 0.0024(5) 
O1 0.0277(6) 0.0214(6) 0.0251(6) 0.0056(5) 0.0091(5) 0.0075(5) 
O2 0.0190(5) 0.0171(5) 0.0215(6) 0.0047(4) 0.0031(5) -0.0025(4) 
O3 0.0118(5) 0.0211(6) 0.0219(6) -0.0003(4) 0.0058(4) 0.0013(4) 
O4 0.0136(5) 0.0450(8) 0.0220(6) 0.0079(5) 0.0059(5) 0.0017(5) 
O5 0.0243(6) 0.0242(6) 0.0180(6) 0.0034(5) 0.0088(5) 0.0062(5) 
 
_geom_special_details 
; 
 All esds (except the esd in the dihedral angle between two l.s. planes) 
 are estimated using the full covariance matrix.  The cell esds are taken 
 into account individually in the estimation of esds in distances, angles 
 and torsion angles; correlations between esds in cell parameters are only 
 used when they are defined by crystal symmetry.  An approximate (isotropic) 
 treatment of cell esds is used for estimating esds involving l.s. planes. 
;
loop_ 
 _geom_bond_atom_site_label_1 
 _geom_bond_atom_site_label_2 
 _geom_bond_distance 
 _geom_bond_site_symmetry_2 
 _geom_bond_publ_flag 
Br1 C11 1.8966(18) . ? 
C1 O1 1.211(2) . ? 
C1 O5 1.323(2) . ? 
C1 C2 1.531(2) . ? 
C2 N1 1.444(2) . ? 
C2 C3 1.556(2) . ? 
C2 H2 0.9800 . ? 
C3 O3 1.3863(19) . ? 
C3 O2 1.3880(18) . ? 
C3 C4 1.544(2) . ? 
C4 F1 1.3306(19) . ? 
C4 F3 1.338(2) . ? 
C4 F2 1.345(2) . ? 
C5 O5 1.460(2) . ? 
C5 C6 1.503(3) . ? 
C5 H5A 0.9700 . ? 
C5 H5B 0.9700 . ? 
C6 H6B 0.9600 . ? 
C6 H6C 0.9600 . ? 
C6 H6A 0.9600 . ? 
C7 O4 1.232(2) . ? 
C7 N1 1.347(2) . ? 
C7 C8 1.487(2) . ? 
C8 C13 1.389(2) . ? 
C8 C9 1.392(2) . ? 
C9 C10 1.379(3) . ? 
C9 H9 0.9300 . ? 
C10 C11 1.385(3) . ? 
C10 H10 0.9300 . ? 
C11 C12 1.385(3) . ? 
C12 C13 1.384(3) . ? 
C12 H12 0.9300 . ? 
C13 H13 0.9300 . ? 
N1 H1 0.834(15) . ? 
O2 H2A 0.8200 . ? 
O3 H3 0.8200 . ? 
 
loop_ 
 _geom_angle_atom_site_label_1 
 _geom_angle_atom_site_label_2 
 _geom_angle_atom_site_label_3 
 _geom_angle 
 _geom_angle_site_symmetry_1 
 _geom_angle_site_symmetry_3 
 _geom_angle_publ_flag 
O1 C1 O5 124.48(15) . . ? 
O1 C1 C2 124.61(14) . . ? 
O5 C1 C2 110.88(13) . . ? 
N1 C2 C1 109.84(12) . . ? 
N1 C2 C3 108.57(12) . . ? 
C1 C2 C3 111.07(12) . . ? 
N1 C2 H2 109.1 . . ? 
C1 C2 H2 109.1 . . ? 
C3 C2 H2 109.1 . . ? 
O3 C3 O2 113.41(12) . . ? 
O3 C3 C4 109.20(13) . . ? 
O2 C3 C4 103.97(12) . . ? 
O3 C3 C2 106.05(12) . . ? 
O2 C3 C2 113.60(12) . . ? 
C4 C3 C2 110.61(12) . . ? 
F1 C4 F3 107.26(14) . . ? 
F1 C4 F2 107.13(13) . . ? 
F3 C4 F2 107.00(14) . . ? 
F1 C4 C3 110.45(13) . . ? 
F3 C4 C3 112.83(13) . . ? 
F2 C4 C3 111.87(13) . . ? 
O5 C5 C6 106.98(15) . . ? 
O5 C5 H5A 110.3 . . ? 
C6 C5 H5A 110.3 . . ? 
O5 C5 H5B 110.3 . . ? 
C6 C5 H5B 110.3 . . ? 
H5A C5 H5B 108.6 . . ? 
C5 C6 H6B 109.5 . . ? 
C5 C6 H6C 109.5 . . ? 
H6B C6 H6C 109.5 . . ? 
C5 C6 H6A 109.5 . . ? 
H6B C6 H6A 109.5 . . ? 
H6C C6 H6A 109.5 . . ? 
O4 C7 N1 119.05(15) . . ? 
O4 C7 C8 122.54(14) . . ? 
N1 C7 C8 118.40(14) . . ? 
C13 C8 C9 119.36(16) . . ? 
C13 C8 C7 122.62(15) . . ? 
C9 C8 C7 118.01(15) . . ? 
C10 C9 C8 120.92(17) . . ? 
C10 C9 H9 119.5 . . ? 
C8 C9 H9 119.5 . . ? 
C9 C10 C11 118.57(17) . . ? 
C9 C10 H10 120.7 . . ? 
C11 C10 H10 120.7 . . ? 
C10 C11 C12 121.84(17) . . ? 
C10 C11 Br1 119.45(14) . . ? 
C12 C11 Br1 118.71(14) . . ? 
C13 C12 C11 118.77(17) . . ? 
C13 C12 H12 120.6 . . ? 
C11 C12 H12 120.6 . . ? 
C12 C13 C8 120.54(16) . . ? 
C12 C13 H13 119.7 . . ? 
C8 C13 H13 119.7 . . ? 
C7 N1 C2 117.74(13) . . ? 
C7 N1 H1 121.9(15) . . ? 
C2 N1 H1 117.3(15) . . ? 
C3 O2 H2A 109.5 . . ? 
C3 O3 H3 109.5 . . ? 
C1 O5 C5 115.70(13) . . ? 
 
loop_ 
 _geom_torsion_atom_site_label_1 
 _geom_torsion_atom_site_label_2 
 _geom_torsion_atom_site_label_3 
 _geom_torsion_atom_site_label_4 
 _geom_torsion 
 _geom_torsion_site_symmetry_1 
 _geom_torsion_site_symmetry_2 
 _geom_torsion_site_symmetry_3 
 _geom_torsion_site_symmetry_4 
 _geom_torsion_publ_flag 
O1 C1 C2 N1 36.5(2) . . . . ? 
O5 C1 C2 N1 -145.28(13) . . . . ? 
O1 C1 C2 C3 -83.65(19) . . . . ? 
O5 C1 C2 C3 94.60(15) . . . . ? 
N1 C2 C3 O3 49.91(16) . . . . ? 
C1 C2 C3 O3 170.77(12) . . . . ? 
N1 C2 C3 O2 -75.32(16) . . . . ? 
C1 C2 C3 O2 45.54(18) . . . . ? 
N1 C2 C3 C4 168.20(12) . . . . ? 
C1 C2 C3 C4 -70.94(16) . . . . ? 
O3 C3 C4 F1 -49.36(17) . . . . ? 
O2 C3 C4 F1 71.99(16) . . . . ? 
C2 C3 C4 F1 -165.71(13) . . . . ? 
O3 C3 C4 F3 -169.40(12) . . . . ? 
O2 C3 C4 F3 -48.06(16) . . . . ? 
C2 C3 C4 F3 74.25(16) . . . . ? 
O3 C3 C4 F2 69.88(16) . . . . ? 
O2 C3 C4 F2 -168.77(13) . . . . ? 
C2 C3 C4 F2 -46.47(17) . . . . ? 
O4 C7 C8 C13 -158.31(17) . . . . ? 
N1 C7 C8 C13 21.4(2) . . . . ? 
O4 C7 C8 C9 21.0(2) . . . . ? 
N1 C7 C8 C9 -159.37(16) . . . . ? 
C13 C8 C9 C10 -0.4(3) . . . . ? 
C7 C8 C9 C10 -179.66(16) . . . . ? 
C8 C9 C10 C11 0.4(3) . . . . ? 
C9 C10 C11 C12 -0.2(3) . . . . ? 
C9 C10 C11 Br1 179.71(15) . . . . ? 
C10 C11 C12 C13 0.0(3) . . . . ? 
Br1 C11 C12 C13 -179.89(14) . . . . ? 
C11 C12 C13 C8 0.0(3) . . . . ? 
C9 C8 C13 C12 0.2(3) . . . . ? 
C7 C8 C13 C12 179.44(16) . . . . ? 
O4 C7 N1 C2 -5.8(2) . . . . ? 
C8 C7 N1 C2 174.52(13) . . . . ? 
C1 C2 N1 C7 66.00(17) . . . . ? 
C3 C2 N1 C7 -172.37(13) . . . . ? 
O1 C1 O5 C5 1.2(2) . . . . ? 
C2 C1 O5 C5 -177.03(13) . . . . ? 
C6 C5 O5 C1 178.76(15) . . . . ? 

loop_ 
 _geom_hbond_atom_site_label_D 
 _geom_hbond_atom_site_label_H 
 _geom_hbond_atom_site_label_A 
 _geom_hbond_distance_DH 
 _geom_hbond_distance_HA 
 _geom_hbond_distance_DA 
 _geom_hbond_angle_DHA 
 _geom_hbond_site_symmetry_A
O2 H2A O1  0.82 1.94 2.7588(18) 176.3 2_556 
O3 H3 O4  0.82 1.83 2.6490(15) 177.9 1_455 

_diffrn_measured_fraction_theta_max    0.957 
_diffrn_reflns_theta_full              67.50 
_diffrn_measured_fraction_theta_full   0.988 
_refine_diff_density_max    0.339
_refine_diff_density_min   -0.461 
_refine_diff_density_rms    0.065 
