# Supplementary material
Source: publisher figshare collection journal article supplement (https://acs.figshare.com/ndownloader/files/4196539)
Supplement: Supplementary file 4 [file 4196539 › jo202201w_si_002/Cpd 3b.cif]

data_RPCJME

_nottingham_internal_coll_name         RPCJME
_nottingham_internal_coll_number       10518 
_nottingham_internal_coll_client       RP/CJM 
_nottingham_internal_coll_type         custom 
_nottingham_internal_coll_frame_time   '12.0000 and 3.0000' 
_nottingham_internal_coll_frame_width  '1.0000' 
_nottingham_internal_coll_frame_method '\w scans' 
_nottingham_internal_coll_user         WL 
_nottingham_internal_coll_date         23/6/2011 
_nottingham_internal_process_user      WL 
_nottingham_internal_process_date      27/06/2011 
_nottingham_internal_solution_user     wl 
_nottingham_internal_solution_date     27/6/2011 
_nottingham_internal_refinement_user   wl 
_nottingham_internal_refinement_date   11/10/2011 
_nottingham_internal_validation_user   wl 
_nottingham_internal_validation_date   12/10/2011 
_nottingham_internal_archive_date      12/10/2011 

_refine_special_details 
; 
 Refinement of F^2^ against ALL reflections.  The weighted R-factor wR and 
 goodness of fit S are based on F^2^, conventional R-factors R are based 
 on F, with F set to zero for negative F^2^. The threshold expression of 
 F^2^ > 2sigma(F^2^) is used only for calculating R-factors(gt) etc. and is 
 not relevant to the choice of reflections for refinement.  R-factors based 
 on F^2^ are statistically about twice as large as those based on F, and R- 
 factors based on ALL data will be even larger. 
; 
 
_audit_creation_method            'enCIFer editing of SHELXL-97 created file' 
_chemical_name_systematic         
; 
 ? 
; 
_chemical_name_common             ? 
_chemical_melting_point           ? 
_chemical_formula_moiety          'C13 H11 Br F3 N O4'  
_chemical_formula_sum             
'C13 H11 Br F3 N O4' 
_chemical_formula_weight          382.14 
 
loop_ 
 _atom_type_symbol 
 _atom_type_description 
 _atom_type_scat_dispersion_real 
 _atom_type_scat_dispersion_imag 
 _atom_type_scat_source 
 'C'  'C'   0.0181   0.0091 
 'International Tables Vol C Tables 4.2.6.8 and 6.1.1.4' 
 'H'  'H'   0.0000   0.0000 
 'International Tables Vol C Tables 4.2.6.8 and 6.1.1.4' 
 'N'  'N'   0.0311   0.0180 
 'International Tables Vol C Tables 4.2.6.8 and 6.1.1.4' 
 'O'  'O'   0.0492   0.0322 
 'International Tables Vol C Tables 4.2.6.8 and 6.1.1.4' 
 'F'  'F'   0.0727   0.0534 
 'International Tables Vol C Tables 4.2.6.8 and 6.1.1.4' 
 'Br'  'Br'  -0.6763   1.2805 
 'International Tables Vol C Tables 4.2.6.8 and 6.1.1.4'  
 
_symmetry_cell_setting            triclinic 
_symmetry_space_group_name_H-M    'P -1' 
_symmetry_space_group_name_Hall   '-P 1' 
 
loop_ 
 _symmetry_equiv_pos_as_xyz 
 'x, y, z' 
 '-x, -y, -z'  
 
_cell_length_a                    9.2599(13) 
_cell_length_b                    9.4971(15) 
_cell_length_c                    9.9419(16) 
_cell_angle_alpha                 70.159(15) 
_cell_angle_beta                  62.394(15) 
_cell_angle_gamma                 83.144(13) 
_cell_volume                      728.0(2) 
_cell_formula_units_Z             2 
_cell_measurement_temperature     90(2) 
_cell_measurement_reflns_used     2970 
_cell_measurement_theta_min       4.95 
_cell_measurement_theta_max       74.83 

_exptl_crystal_description        tablet 
_exptl_crystal_colour             colourless 
_exptl_crystal_size_max           0.23 
_exptl_crystal_size_mid           0.16 
_exptl_crystal_size_min           0.05 
_exptl_crystal_density_meas       ? 
_exptl_crystal_density_diffrn     1.743 
_exptl_crystal_density_method     'not measured' 
_exptl_crystal_F_000              380 
_exptl_absorpt_coefficient_mu     4.357 
_exptl_absorpt_correction_T_min   0.383 
_exptl_absorpt_correction_T_max   1.000 
_exptl_absorpt_correction_type    'multi-scan' 
_exptl_absorpt_process_details    
;
CrysAlisPro, Agilent Technologies,
Version 1.171.35.11 (release 16-05-2011 CrysAlis171 .NET)
(compiled May 16 2011,17:55:39)
Empirical absorption correction using spherical harmonics,
 implemented in SCALE3 ABSPACK scaling algorithm.
; 

_diffrn_ambient_temperature       90(2)
_diffrn_radiation_wavelength      1.54184
_diffrn_radiation_type            'Cu K\a'
_diffrn_radiation_source          'SuperNova (Cu) X-ray Source'
_diffrn_radiation_monochromator   'mirror'
_diffrn_measurement_device_type   'SuperNova, Single source at offset), Atlas'
_diffrn_measurement_method        '\w scans'
_diffrn_detector_area_resol_mean  10.3613
_diffrn_standards_number          0
_diffrn_standards_interval_count  .
_diffrn_standards_decay_%         0
_diffrn_reflns_number             4772 
_diffrn_reflns_av_R_equivalents   0.0255 
_diffrn_reflns_av_sigmaI/netI     0.0226 
_diffrn_reflns_limit_h_min        -11 
_diffrn_reflns_limit_h_max        10 
_diffrn_reflns_limit_k_min        -11 
_diffrn_reflns_limit_k_max        11 
_diffrn_reflns_limit_l_min        -12 
_diffrn_reflns_limit_l_max        12 
_diffrn_reflns_theta_min          4.96 
_diffrn_reflns_theta_max          75.01 
_reflns_number_total              2815 
_reflns_number_gt                 2682 
_reflns_threshold_expression      I>2\s(I) 
 
_computing_data_collection       
;
CrysAlisPro, Agilent Technologies,
Version 1.171.35.11 (release 16-05-2011 CrysAlis171 .NET)
(compiled May 16 2011,17:55:39)
; 
_computing_cell_refinement       
;
CrysAlisPro, Agilent Technologies,
Version 1.171.35.11 (release 16-05-2011 CrysAlis171 .NET)
(compiled May 16 2011,17:55:39)
; 
_computing_data_reduction        
;
CrysAlisPro, Agilent Technologies,
Version 1.171.35.11 (release 16-05-2011 CrysAlis171 .NET)
(compiled May 16 2011,17:55:39)
; 
_computing_structure_solution    
;
  Olex2 1.1
  (compiled 2011.09.07 svn.r1971, GUI svn.r3853)
; 
_computing_structure_refinement  'SHELXL97 (Sheldrick, 2008)' 
_computing_molecular_graphics    ' ? ' 
_computing_publication_material  'enCIFer(Allen et al.,2004);PLATON(Spek,2003)' 

_refine_ls_structure_factor_coef  Fsqd  
_refine_ls_matrix_type            full 
_refine_ls_weighting_scheme       calc  
_refine_ls_weighting_details      
'calc w=1/[\s^2^(Fo^2^)+(0.1108P)^2^+0.8024P] where P=(Fo^2^+2Fc^2^)/3'
_atom_sites_solution_primary      iterative 
_atom_sites_solution_secondary    difmap 
_atom_sites_solution_hydrogens    mixed
_refine_ls_hydrogen_treatment     constr
_refine_ls_extinction_method      none 
_refine_ls_extinction_coef        ?  
_refine_ls_number_reflns          2815 
_refine_ls_number_parameters      201 
_refine_ls_number_restraints      0 
_refine_ls_R_factor_all           0.0535 
_refine_ls_R_factor_gt            0.0520 
_refine_ls_wR_factor_ref          0.1512 
_refine_ls_wR_factor_gt           0.1478 
_refine_ls_goodness_of_fit_ref    1.097 
_refine_ls_restrained_S_all       1.097 
_refine_ls_shift/su_max           0.000 
_refine_ls_shift/su_mean          0.000 
 
loop_ 
 _atom_site_label 
 _atom_site_type_symbol 
 _atom_site_fract_x 
 _atom_site_fract_y 
 _atom_site_fract_z 
 _atom_site_U_iso_or_equiv 
 _atom_site_adp_type 
 _atom_site_occupancy 
 _atom_site_symmetry_multiplicity 
 _atom_site_calc_flag 
 _atom_site_refinement_flags 
 _atom_site_disorder_assembly 
 _atom_site_disorder_group 
O1 O 0.3457(3) 0.0471(3) 0.6034(3) 0.0243(5) Uani 1 1 d . . . 
C2 C 0.1864(4) 0.0761(4) 0.6676(4) 0.0206(6) Uani 1 1 d . . . 
N3 N 0.0938(4) -0.0039(3) 0.8120(3) 0.0227(6) Uani 1 1 d . . . 
C4 C 0.1996(4) -0.1028(4) 0.8727(4) 0.0220(7) Uani 1 1 d . . . 
C5 C 0.3664(4) -0.0816(4) 0.7215(4) 0.0232(7) Uani 1 1 d . . . 
H5 H 0.3872 -0.1716 0.6855 0.028 Uiso 1 1 calc R . . 
C6 C 0.1291(4) 0.1933(4) 0.5631(4) 0.0229(7) Uani 1 1 d . . . 
C7 C 0.2151(4) 0.3292(4) 0.4568(4) 0.0233(7) Uani 1 1 d . . . 
C8 C 0.1574(5) 0.4310(4) 0.3555(4) 0.0260(7) Uani 1 1 d . . . 
H8 H 0.2180 0.5217 0.2812 0.031 Uiso 1 1 calc R . . 
C9 C 0.0108(5) 0.3982(4) 0.3645(4) 0.0285(8) Uani 1 1 d . . . 
H9 H -0.0289 0.4670 0.2956 0.034 Uiso 1 1 calc R . . 
C10 C -0.0786(5) 0.2665(4) 0.4723(4) 0.0269(7) Uani 1 1 d . . . 
H10 H -0.1798 0.2463 0.4783 0.032 Uiso 1 1 calc R . . 
C11 C -0.0208(4) 0.1635(4) 0.5722(4) 0.0252(7) Uani 1 1 d . . . 
H11 H -0.0826 0.0733 0.6464 0.030 Uiso 1 1 calc R . . 
Br12 Br 0.40357(4) 0.38962(4) 0.45589(4) 0.02824(19) Uani 1 1 d . . . 
O13 O 0.2128(3) -0.0642(3) 0.9893(3) 0.0235(5) Uani 1 1 d . . . 
H13 H 0.1214 -0.0402 1.0499 0.035 Uiso 1 1 calc R . . 
C14 C 0.1291(5) -0.2642(4) 0.9433(4) 0.0268(7) Uani 1 1 d . . . 
F15 F 0.2232(3) -0.3612(2) 0.9937(3) 0.0324(5) Uani 1 1 d . . . 
F16 F -0.0194(3) -0.2784(2) 1.0702(2) 0.0308(5) Uani 1 1 d . . . 
F17 F 0.1107(3) -0.3064(3) 0.8365(3) 0.0368(5) Uani 1 1 d . . . 
C18 C 0.5079(4) -0.0508(4) 0.7475(4) 0.0235(7) Uani 1 1 d . . . 
O19 O 0.5779(3) 0.0672(3) 0.6954(3) 0.0317(6) Uani 1 1 d . . . 
O20 O 0.5359(3) -0.1792(3) 0.8390(3) 0.0263(5) Uani 1 1 d . . . 
C21 C 0.6510(5) -0.1728(5) 0.8991(5) 0.0301(8) Uani 1 1 d . . . 
H21A H 0.6486 -0.0746 0.9143 0.036 Uiso 1 1 calc R . . 
H21B H 0.7632 -0.1865 0.8223 0.036 Uiso 1 1 calc R . . 
C22 C 0.5998(6) -0.2965(5) 1.0559(5) 0.0372(9) Uani 1 1 d . . . 
H22A H 0.5985 -0.3925 1.0398 0.056 Uiso 1 1 calc R . . 
H22B H 0.4903 -0.2793 1.1321 0.056 Uiso 1 1 calc R . . 
H22C H 0.6769 -0.2986 1.0984 0.056 Uiso 1 1 calc R . . 
 
loop_ 
 _atom_site_aniso_label 
 _atom_site_aniso_U_11 
 _atom_site_aniso_U_22 
 _atom_site_aniso_U_33 
 _atom_site_aniso_U_23 
 _atom_site_aniso_U_13 
 _atom_site_aniso_U_12 
O1 0.0218(12) 0.0308(13) 0.0111(10) -0.0013(9) -0.0038(9) 0.0009(10) 
C2 0.0200(15) 0.0275(16) 0.0126(14) -0.0069(12) -0.0056(12) 0.0007(12) 
N3 0.0242(14) 0.0308(14) 0.0129(12) -0.0055(11) -0.0091(11) 0.0006(12) 
C4 0.0206(15) 0.0319(17) 0.0131(14) -0.0069(12) -0.0076(12) 0.0014(13) 
C5 0.0251(17) 0.0290(17) 0.0118(14) -0.0046(12) -0.0073(13) 0.0035(13) 
C6 0.0262(16) 0.0294(17) 0.0128(14) -0.0071(12) -0.0089(13) 0.0037(13) 
C7 0.0260(16) 0.0282(17) 0.0134(14) -0.0053(12) -0.0065(12) -0.0049(13) 
C8 0.0304(18) 0.0255(16) 0.0173(15) -0.0029(12) -0.0088(14) -0.0030(13) 
C9 0.037(2) 0.0314(18) 0.0186(16) -0.0037(14) -0.0165(15) 0.0013(15) 
C10 0.0256(17) 0.0368(19) 0.0195(15) -0.0061(14) -0.0127(14) -0.0004(14) 
C11 0.0268(17) 0.0297(17) 0.0136(14) -0.0024(12) -0.0072(13) -0.0028(13) 
Br12 0.0274(3) 0.0309(3) 0.0269(3) -0.00674(17) -0.01348(19) -0.00281(17) 
O13 0.0202(11) 0.0369(13) 0.0129(10) -0.0085(9) -0.0068(9) 0.0014(10) 
C14 0.0296(18) 0.0331(18) 0.0146(14) -0.0027(13) -0.0103(14) -0.0017(14) 
F15 0.0340(12) 0.0297(11) 0.0272(11) -0.0015(8) -0.0147(9) 0.0035(9) 
F16 0.0247(11) 0.0336(11) 0.0210(10) 0.0012(8) -0.0048(8) -0.0073(9) 
F17 0.0522(15) 0.0368(12) 0.0256(11) -0.0050(9) -0.0216(11) -0.0100(10) 
C18 0.0198(16) 0.0332(18) 0.0117(14) -0.0062(13) -0.0032(12) 0.0016(14) 
O19 0.0284(13) 0.0344(14) 0.0255(13) -0.0023(10) -0.0101(11) -0.0058(11) 
O20 0.0257(12) 0.0314(12) 0.0220(12) -0.0061(10) -0.0124(10) 0.0002(10) 
C21 0.0267(18) 0.037(2) 0.0268(18) -0.0071(15) -0.0142(15) -0.0005(15) 
C22 0.041(2) 0.041(2) 0.035(2) -0.0031(17) -0.0259(18) -0.0030(17) 
 
_geom_special_details 
; 
 All esds (except the esd in the dihedral angle between two l.s. planes) 
 are estimated using the full covariance matrix.  The cell esds are taken 
 into account individually in the estimation of esds in distances, angles 
 and torsion angles; correlations between esds in cell parameters are only 
 used when they are defined by crystal symmetry.  An approximate (isotropic) 
 treatment of cell esds is used for estimating esds involving l.s. planes. 
;
loop_ 
 _geom_bond_atom_site_label_1 
 _geom_bond_atom_site_label_2 
 _geom_bond_distance 
 _geom_bond_site_symmetry_2 
 _geom_bond_publ_flag 
O1 C2 1.345(4) . ? 
O1 C5 1.445(4) . ? 
C2 N3 1.283(4) . ? 
C2 C6 1.478(4) . ? 
N3 C4 1.466(4) . ? 
C4 O13 1.388(4) . ? 
C4 C14 1.534(5) . ? 
C4 C5 1.550(4) . ? 
C5 C18 1.525(5) . ? 
C5 H5 1.0000 . ? 
C6 C7 1.399(5) . ? 
C6 C11 1.406(5) . ? 
C7 C8 1.396(5) . ? 
C7 Br12 1.896(4) . ? 
C8 C9 1.385(5) . ? 
C8 H8 0.9500 . ? 
C9 C10 1.383(5) . ? 
C9 H9 0.9500 . ? 
C10 C11 1.392(5) . ? 
C10 H10 0.9500 . ? 
C11 H11 0.9500 . ? 
O13 H13 0.8400 . ? 
C14 F15 1.327(4) . ? 
C14 F17 1.337(4) . ? 
C14 F16 1.350(4) . ? 
C18 O19 1.189(5) . ? 
C18 O20 1.331(4) . ? 
O20 C21 1.459(4) . ? 
C21 C22 1.496(5) . ? 
C21 H21A 0.9900 . ? 
C21 H21B 0.9900 . ? 
C22 H22A 0.9800 . ? 
C22 H22B 0.9800 . ? 
C22 H22C 0.9800 . ? 
 
loop_ 
 _geom_angle_atom_site_label_1 
 _geom_angle_atom_site_label_2 
 _geom_angle_atom_site_label_3 
 _geom_angle 
 _geom_angle_site_symmetry_1 
 _geom_angle_site_symmetry_3 
 _geom_angle_publ_flag 
C2 O1 C5 106.4(2) . . ? 
N3 C2 O1 118.1(3) . . ? 
N3 C2 C6 124.6(3) . . ? 
O1 C2 C6 117.2(3) . . ? 
C2 N3 C4 106.9(3) . . ? 
O13 C4 N3 112.2(3) . . ? 
O13 C4 C14 109.4(3) . . ? 
N3 C4 C14 108.6(3) . . ? 
O13 C4 C5 111.0(3) . . ? 
N3 C4 C5 103.7(2) . . ? 
C14 C4 C5 111.8(3) . . ? 
O1 C5 C18 110.1(3) . . ? 
O1 C5 C4 103.5(3) . . ? 
C18 C5 C4 112.9(3) . . ? 
O1 C5 H5 110.0 . . ? 
C18 C5 H5 110.0 . . ? 
C4 C5 H5 110.0 . . ? 
C7 C6 C11 119.0(3) . . ? 
C7 C6 C2 124.1(3) . . ? 
C11 C6 C2 116.9(3) . . ? 
C8 C7 C6 120.7(3) . . ? 
C8 C7 Br12 117.3(3) . . ? 
C6 C7 Br12 121.8(3) . . ? 
C9 C8 C7 119.3(3) . . ? 
C9 C8 H8 120.4 . . ? 
C7 C8 H8 120.4 . . ? 
C10 C9 C8 120.8(3) . . ? 
C10 C9 H9 119.6 . . ? 
C8 C9 H9 119.6 . . ? 
C9 C10 C11 120.3(3) . . ? 
C9 C10 H10 119.9 . . ? 
C11 C10 H10 119.9 . . ? 
C10 C11 C6 119.9(3) . . ? 
C10 C11 H11 120.1 . . ? 
C6 C11 H11 120.1 . . ? 
C4 O13 H13 109.5 . . ? 
F15 C14 F17 107.7(3) . . ? 
F15 C14 F16 107.3(3) . . ? 
F17 C14 F16 107.1(3) . . ? 
F15 C14 C4 111.9(3) . . ? 
F17 C14 C4 111.9(3) . . ? 
F16 C14 C4 110.8(3) . . ? 
O19 C18 O20 127.3(3) . . ? 
O19 C18 C5 125.4(3) . . ? 
O20 C18 C5 107.3(3) . . ? 
C18 O20 C21 117.1(3) . . ? 
O20 C21 C22 106.9(3) . . ? 
O20 C21 H21A 110.3 . . ? 
C22 C21 H21A 110.3 . . ? 
O20 C21 H21B 110.3 . . ? 
C22 C21 H21B 110.3 . . ? 
H21A C21 H21B 108.6 . . ? 
C21 C22 H22A 109.5 . . ? 
C21 C22 H22B 109.5 . . ? 
H22A C22 H22B 109.5 . . ? 
C21 C22 H22C 109.5 . . ? 
H22A C22 H22C 109.5 . . ? 
H22B C22 H22C 109.5 . . ? 
 
loop_ 
 _geom_torsion_atom_site_label_1 
 _geom_torsion_atom_site_label_2 
 _geom_torsion_atom_site_label_3 
 _geom_torsion_atom_site_label_4 
 _geom_torsion 
 _geom_torsion_site_symmetry_1 
 _geom_torsion_site_symmetry_2 
 _geom_torsion_site_symmetry_3 
 _geom_torsion_site_symmetry_4 
 _geom_torsion_publ_flag 
C5 O1 C2 N3 3.6(4) . . . . ? 
C5 O1 C2 C6 -173.4(3) . . . . ? 
O1 C2 N3 C4 4.6(4) . . . . ? 
C6 C2 N3 C4 -178.7(3) . . . . ? 
C2 N3 C4 O13 109.9(3) . . . . ? 
C2 N3 C4 C14 -129.1(3) . . . . ? 
C2 N3 C4 C5 -10.0(3) . . . . ? 
C2 O1 C5 C18 -130.4(3) . . . . ? 
C2 O1 C5 C4 -9.4(3) . . . . ? 
O13 C4 C5 O1 -109.0(3) . . . . ? 
N3 C4 C5 O1 11.7(3) . . . . ? 
C14 C4 C5 O1 128.5(3) . . . . ? 
O13 C4 C5 C18 10.1(4) . . . . ? 
N3 C4 C5 C18 130.8(3) . . . . ? 
C14 C4 C5 C18 -112.4(3) . . . . ? 
N3 C2 C6 C7 141.8(4) . . . . ? 
O1 C2 C6 C7 -41.4(5) . . . . ? 
N3 C2 C6 C11 -38.6(5) . . . . ? 
O1 C2 C6 C11 138.1(3) . . . . ? 
C11 C6 C7 C8 -3.1(5) . . . . ? 
C2 C6 C7 C8 176.4(3) . . . . ? 
C11 C6 C7 Br12 171.9(2) . . . . ? 
C2 C6 C7 Br12 -8.6(5) . . . . ? 
C6 C7 C8 C9 2.0(5) . . . . ? 
Br12 C7 C8 C9 -173.2(3) . . . . ? 
C7 C8 C9 C10 0.1(5) . . . . ? 
C8 C9 C10 C11 -1.0(6) . . . . ? 
C9 C10 C11 C6 -0.2(5) . . . . ? 
C7 C6 C11 C10 2.2(5) . . . . ? 
C2 C6 C11 C10 -177.4(3) . . . . ? 
O13 C4 C14 F15 -60.3(4) . . . . ? 
N3 C4 C14 F15 177.0(3) . . . . ? 
C5 C4 C14 F15 63.2(4) . . . . ? 
O13 C4 C14 F17 178.8(3) . . . . ? 
N3 C4 C14 F17 56.0(4) . . . . ? 
C5 C4 C14 F17 -57.8(4) . . . . ? 
O13 C4 C14 F16 59.4(4) . . . . ? 
N3 C4 C14 F16 -63.4(3) . . . . ? 
C5 C4 C14 F16 -177.2(3) . . . . ? 
O1 C5 C18 O19 9.1(4) . . . . ? 
C4 C5 C18 O19 -106.1(4) . . . . ? 
O1 C5 C18 O20 -171.3(3) . . . . ? 
C4 C5 C18 O20 73.5(3) . . . . ? 
O19 C18 O20 C21 8.1(5) . . . . ? 
C5 C18 O20 C21 -171.5(3) . . . . ? 
C18 O20 C21 C22 150.5(3) . . . . ? 

_diffrn_measured_fraction_theta_max    0.937 
_diffrn_reflns_theta_full              67.50 
_diffrn_measured_fraction_theta_full   0.980 
_refine_diff_density_max    2.006
_refine_diff_density_min   -1.174 
_refine_diff_density_rms    0.137 
