# Supplementary material
Source: publisher figshare collection journal article supplement (https://acs.figshare.com/ndownloader/files/4196539)
Supplement: Supplementary file 4 [file 4196539 › jo202201w_si_002/Cpd 3c.cif]

data_rpcjmg

_nottingham_internal_coll_name         RPCJMG
_nottingham_internal_coll_number       10716 
_nottingham_internal_coll_client       RP/CJM 
_nottingham_internal_coll_type         custom 
_nottingham_internal_coll_frame_time   '3.0000 and 5.0000' 
_nottingham_internal_coll_frame_width  '2.0000' 
_nottingham_internal_coll_frame_method '\w scans' 
_nottingham_internal_coll_user         WL 
_nottingham_internal_coll_date         5/8/2011 
_nottingham_internal_process_user      WL 
_nottingham_internal_process_date      07/09/2011 
_nottingham_internal_solution_user     wl 
_nottingham_internal_solution_date     7/9/2011 
_nottingham_internal_refinement_user   wl 
_nottingham_internal_refinement_date   11/10/2011 
_nottingham_internal_validation_user   wl 
_nottingham_internal_validation_date   12/10/2011 
_nottingham_internal_archive_date      12/10/2011 

_refine_special_details 
; 
 Refinement of F^2^ against ALL reflections.  The weighted R-factor wR and 
 goodness of fit S are based on F^2^, conventional R-factors R are based 
 on F, with F set to zero for negative F^2^. The threshold expression of 
 F^2^ > 2sigma(F^2^) is used only for calculating R-factors(gt) etc. and is 
 not relevant to the choice of reflections for refinement.  R-factors based 
 on F^2^ are statistically about twice as large as those based on F, and R- 
 factors based on ALL data will be even larger. 
; 
 
_audit_creation_method            'enCIFer editing of SHELXL-97 created file' 
_chemical_name_systematic         
; 
 ? 
; 
_chemical_name_common             ? 
_chemical_melting_point           ? 
_chemical_formula_moiety          
'C14 H14 F3 N O5'  
_chemical_formula_sum             
'C14 H14 F3 N O5' 
_chemical_formula_weight          333.26 
 
loop_ 
 _atom_type_symbol 
 _atom_type_description 
 _atom_type_scat_dispersion_real 
 _atom_type_scat_dispersion_imag 
 _atom_type_scat_source 
 'C'  'C'   0.0181   0.0091 
 'International Tables Vol C Tables 4.2.6.8 and 6.1.1.4' 
 'H'  'H'   0.0000   0.0000 
 'International Tables Vol C Tables 4.2.6.8 and 6.1.1.4' 
 'N'  'N'   0.0311   0.0180 
 'International Tables Vol C Tables 4.2.6.8 and 6.1.1.4' 
 'O'  'O'   0.0492   0.0322 
 'International Tables Vol C Tables 4.2.6.8 and 6.1.1.4' 
 'F'  'F'   0.0727   0.0534 
 'International Tables Vol C Tables 4.2.6.8 and 6.1.1.4'  
 
_symmetry_cell_setting            monoclinic 
_symmetry_space_group_name_H-M    'P 21/n' 
_symmetry_space_group_name_Hall   '-P 2yn' 
 
loop_ 
 _symmetry_equiv_pos_as_xyz 
 'x, y, z' 
 '-x+1/2, y+1/2, -z+1/2' 
 '-x, -y, -z' 
 'x-1/2, -y-1/2, z-1/2'  
 
_cell_length_a                    9.5898(11) 
_cell_length_b                    15.6530(15) 
_cell_length_c                    11.0541(13) 
_cell_angle_alpha                 90.00 
_cell_angle_beta                  115.637(14) 
_cell_angle_gamma                 90.00 
_cell_volume                      1496.0(3) 
_cell_formula_units_Z             4 
_cell_measurement_temperature     90(2) 
_cell_measurement_reflns_used     3061 
_cell_measurement_theta_min       4.43 
_cell_measurement_theta_max       74.32 

_exptl_crystal_description        rod 
_exptl_crystal_colour             colourless 
_exptl_crystal_size_max           0.5160 
_exptl_crystal_size_mid           0.2406 
_exptl_crystal_size_min           0.1444 
_exptl_crystal_density_meas       ? 
_exptl_crystal_density_diffrn     1.480 
_exptl_crystal_density_method     'not measured' 
_exptl_crystal_F_000              688 
_exptl_absorpt_coefficient_mu     1.191 
_exptl_absorpt_correction_T_min   0.830 
_exptl_absorpt_correction_T_max   1.558 
_exptl_absorpt_correction_type    'gaussian' 
_exptl_absorpt_process_details    
;
CrysAlisPro, Agilent Technologies,
Version 1.171.35.15 (release 03-08-2011 CrysAlis171 .NET)
(compiled Aug  3 2011,13:03:54)
Numerical absorption correction based on gaussian integration over
			a multifaceted crystal model
; 

_diffrn_ambient_temperature       90(2)
_diffrn_radiation_wavelength      1.54184
_diffrn_radiation_type            'Cu K\a'
_diffrn_radiation_source          'SuperNova (Cu) X-ray Source'
_diffrn_radiation_monochromator   'mirror'
_diffrn_measurement_device_type   'SuperNova, Single source at offset), Atlas'
_diffrn_measurement_method        '\w scans'
_diffrn_detector_area_resol_mean  10.3613
_diffrn_standards_number          0
_diffrn_standards_interval_count  .
_diffrn_standards_decay_%         0
_diffrn_reflns_number             6992 
_diffrn_reflns_av_R_equivalents   0.0218 
_diffrn_reflns_av_sigmaI/netI     0.0238 
_diffrn_reflns_limit_h_min        -11 
_diffrn_reflns_limit_h_max        11 
_diffrn_reflns_limit_k_min        -19 
_diffrn_reflns_limit_k_max        19 
_diffrn_reflns_limit_l_min        -10 
_diffrn_reflns_limit_l_max        13 
_diffrn_reflns_theta_min          5.12 
_diffrn_reflns_theta_max          74.49 
_reflns_number_total              2959 
_reflns_number_gt                 2600 
_reflns_threshold_expression      I>2\s(I) 
 
_computing_data_collection       
;
CrysAlisPro, Agilent Technologies,
Version 1.171.35.15 (release 03-08-2011 CrysAlis171 .NET)
(compiled Aug  3 2011,13:03:54)
; 
_computing_cell_refinement       
;
CrysAlisPro, Agilent Technologies,
Version 1.171.35.15 (release 03-08-2011 CrysAlis171 .NET)
(compiled Aug  3 2011,13:03:54)
; 
_computing_data_reduction        
;
CrysAlisPro, Agilent Technologies,
Version 1.171.35.15 (release 03-08-2011 CrysAlis171 .NET)
(compiled Aug  3 2011,13:03:54)
; 
_computing_structure_solution    
;
  Olex2 1.1
  (compiled 2011.09.07 svn.r1971, GUI svn.r3853)
; 
_computing_structure_refinement  'SHELXL97 (Sheldrick, 2008)' 
_computing_molecular_graphics    ' ? ' 
_computing_publication_material  'enCIFer(Allen et al.,2004);PLATON(Spek,2003)' 

_refine_ls_structure_factor_coef  Fsqd  
_refine_ls_matrix_type            full 
_refine_ls_weighting_scheme       calc  
_refine_ls_weighting_details      
'calc w=1/[\s^2^(Fo^2^)+(0.0467P)^2^+0.4990P] where P=(Fo^2^+2Fc^2^)/3'
_atom_sites_solution_primary      iterative 
_atom_sites_solution_secondary    difmap 
_atom_sites_solution_hydrogens    mixed
_refine_ls_hydrogen_treatment     constr
_refine_ls_extinction_method      none 
_refine_ls_extinction_coef        ?  
_refine_ls_number_reflns          2959 
_refine_ls_number_parameters      211 
_refine_ls_number_restraints      0 
_refine_ls_R_factor_all           0.0406 
_refine_ls_R_factor_gt            0.0355 
_refine_ls_wR_factor_ref          0.0930 
_refine_ls_wR_factor_gt           0.0888 
_refine_ls_goodness_of_fit_ref    1.044 
_refine_ls_restrained_S_all       1.044 
_refine_ls_shift/su_max           0.000 
_refine_ls_shift/su_mean          0.000 
 
loop_ 
 _atom_site_label 
 _atom_site_type_symbol 
 _atom_site_fract_x 
 _atom_site_fract_y 
 _atom_site_fract_z 
 _atom_site_U_iso_or_equiv 
 _atom_site_adp_type 
 _atom_site_occupancy 
 _atom_site_symmetry_multiplicity 
 _atom_site_calc_flag 
 _atom_site_refinement_flags 
 _atom_site_disorder_assembly 
 _atom_site_disorder_group 
O1 O 0.90593(10) 0.42518(7) 0.07505(9) 0.0217(2) Uani 1 1 d . . . 
C2 C 0.82438(14) 0.44677(9) 0.14528(13) 0.0186(3) Uani 1 1 d . . . 
N3 N 0.69765(12) 0.48796(7) 0.08139(11) 0.0191(2) Uani 1 1 d . . . 
C4 C 0.67735(14) 0.49991(9) -0.05606(13) 0.0204(3) Uani 1 1 d . . . 
C5 C 0.81372(14) 0.44933(9) -0.06202(13) 0.0198(3) Uani 1 1 d . . . 
H5 H 0.8743 0.4867 -0.0953 0.024 Uiso 1 1 calc R . . 
C6 C 0.89015(14) 0.41998(8) 0.28517(13) 0.0187(3) Uani 1 1 d . . . 
C7 C 1.02246(15) 0.36925(9) 0.33758(14) 0.0216(3) Uani 1 1 d . . . 
H7 H 1.0718 0.3539 0.2825 0.026 Uiso 1 1 calc R . . 
C8 C 1.08302(15) 0.34085(9) 0.46942(14) 0.0228(3) Uani 1 1 d . . . 
H8 H 1.1729 0.3059 0.5041 0.027 Uiso 1 1 calc R . . 
C9 C 1.01142(15) 0.36384(9) 0.55039(13) 0.0212(3) Uani 1 1 d . . . 
C10 C 0.87980(15) 0.41588(9) 0.49917(14) 0.0211(3) Uani 1 1 d . . . 
H10 H 0.8320 0.4322 0.5550 0.025 Uiso 1 1 calc R . . 
C11 C 0.81951(14) 0.44338(9) 0.36817(13) 0.0197(3) Uani 1 1 d . . . 
H11 H 0.7297 0.4784 0.3337 0.024 Uiso 1 1 calc R . . 
O12 O 1.06054(12) 0.33927(7) 0.68012(10) 0.0271(2) Uani 1 1 d . . . 
C13 C 1.19439(18) 0.28525(11) 0.73539(16) 0.0335(4) Uani 1 1 d . . . 
H13A H 1.1776 0.2348 0.6782 0.050 Uiso 1 1 calc R . . 
H13B H 1.2122 0.2672 0.8258 0.050 Uiso 1 1 calc R . . 
H13C H 1.2848 0.3168 0.7399 0.050 Uiso 1 1 calc R . . 
O14 O 0.53601(10) 0.47021(7) -0.15089(10) 0.0250(2) Uani 1 1 d . . . 
H14 H 0.4664 0.4828 -0.1270 0.038 Uiso 1 1 calc R . . 
C15 C 0.69373(17) 0.59517(10) -0.07877(15) 0.0263(3) Uani 1 1 d . . . 
F16 F 0.68427(12) 0.60992(6) -0.20109(9) 0.0384(2) Uani 1 1 d . . . 
F17 F 0.58514(10) 0.64172(6) -0.06481(10) 0.0366(2) Uani 1 1 d . . . 
F18 F 0.83203(10) 0.62511(6) 0.00945(9) 0.0296(2) Uani 1 1 d . . . 
C19 C 0.75760(14) 0.36992(9) -0.14854(14) 0.0203(3) Uani 1 1 d . . . 
O20 O 0.76015(12) 0.29951(7) -0.10489(11) 0.0293(2) Uani 1 1 d . . . 
O21 O 0.70552(11) 0.39163(6) -0.27683(10) 0.0229(2) Uani 1 1 d . . . 
C22 C 0.6242(2) 0.32537(11) -0.37471(15) 0.0336(4) Uani 1 1 d . . . 
H22A H 0.5741 0.2848 -0.3371 0.040 Uiso 1 1 calc R . . 
H22B H 0.6977 0.2933 -0.3986 0.040 Uiso 1 1 calc R . . 
C23 C 0.5050(2) 0.36859(13) -0.49627(18) 0.0421(4) Uani 1 1 d . . . 
H23A H 0.4468 0.3255 -0.5636 0.063 Uiso 1 1 calc R . . 
H23B H 0.5560 0.4077 -0.5336 0.063 Uiso 1 1 calc R . . 
H23C H 0.4339 0.4009 -0.4711 0.063 Uiso 1 1 calc R . . 
 
loop_ 
 _atom_site_aniso_label 
 _atom_site_aniso_U_11 
 _atom_site_aniso_U_22 
 _atom_site_aniso_U_33 
 _atom_site_aniso_U_23 
 _atom_site_aniso_U_13 
 _atom_site_aniso_U_12 
O1 0.0155(4) 0.0315(5) 0.0182(5) 0.0018(4) 0.0073(4) 0.0041(4) 
C2 0.0144(6) 0.0200(6) 0.0227(7) -0.0022(5) 0.0092(5) -0.0030(5) 
N3 0.0159(5) 0.0224(6) 0.0181(5) -0.0004(4) 0.0065(4) 0.0001(4) 
C4 0.0157(6) 0.0264(7) 0.0176(6) -0.0010(5) 0.0058(5) -0.0006(5) 
C5 0.0157(6) 0.0253(7) 0.0172(6) 0.0022(5) 0.0061(5) 0.0008(5) 
C6 0.0154(6) 0.0183(6) 0.0204(7) -0.0011(5) 0.0059(5) -0.0016(5) 
C7 0.0188(6) 0.0235(7) 0.0217(7) -0.0025(5) 0.0081(5) 0.0012(5) 
C8 0.0202(6) 0.0221(7) 0.0224(7) -0.0010(5) 0.0056(5) 0.0043(5) 
C9 0.0219(6) 0.0192(6) 0.0190(6) 0.0000(5) 0.0057(5) -0.0020(5) 
C10 0.0188(6) 0.0226(7) 0.0226(7) -0.0017(5) 0.0097(5) -0.0014(5) 
C11 0.0147(6) 0.0213(6) 0.0220(7) -0.0010(5) 0.0068(5) -0.0006(5) 
O12 0.0301(5) 0.0282(5) 0.0193(5) 0.0039(4) 0.0072(4) 0.0069(4) 
C13 0.0361(8) 0.0327(8) 0.0238(7) 0.0042(6) 0.0054(6) 0.0117(7) 
O14 0.0142(4) 0.0380(6) 0.0210(5) -0.0055(4) 0.0058(4) 0.0019(4) 
C15 0.0270(7) 0.0279(7) 0.0239(7) 0.0046(6) 0.0107(6) 0.0055(6) 
F16 0.0498(6) 0.0373(5) 0.0273(5) 0.0113(4) 0.0158(4) 0.0036(4) 
F17 0.0350(5) 0.0295(5) 0.0441(6) 0.0054(4) 0.0161(4) 0.0133(4) 
F18 0.0309(4) 0.0248(4) 0.0333(5) -0.0014(4) 0.0142(4) -0.0047(3) 
C19 0.0159(6) 0.0244(7) 0.0225(7) 0.0012(5) 0.0101(5) 0.0001(5) 
O20 0.0316(5) 0.0243(5) 0.0308(6) 0.0055(4) 0.0125(4) -0.0018(4) 
O21 0.0271(5) 0.0217(5) 0.0207(5) -0.0016(4) 0.0110(4) -0.0041(4) 
C22 0.0461(9) 0.0279(8) 0.0249(8) -0.0072(6) 0.0135(7) -0.0116(7) 
C23 0.0356(8) 0.0496(10) 0.0307(8) -0.0002(8) 0.0046(7) -0.0191(8) 
 
_geom_special_details 
; 
 All esds (except the esd in the dihedral angle between two l.s. planes) 
 are estimated using the full covariance matrix.  The cell esds are taken 
 into account individually in the estimation of esds in distances, angles 
 and torsion angles; correlations between esds in cell parameters are only 
 used when they are defined by crystal symmetry.  An approximate (isotropic) 
 treatment of cell esds is used for estimating esds involving l.s. planes. 
;
loop_ 
 _geom_bond_atom_site_label_1 
 _geom_bond_atom_site_label_2 
 _geom_bond_distance 
 _geom_bond_site_symmetry_2 
 _geom_bond_publ_flag 
O1 C2 1.3616(15) . ? 
O1 C5 1.4357(16) . ? 
C2 N3 1.2840(17) . ? 
C2 C6 1.4564(19) . ? 
N3 C4 1.4578(17) . ? 
C4 O14 1.3865(16) . ? 
C4 C15 1.531(2) . ? 
C4 C5 1.5544(18) . ? 
C5 C19 1.5179(19) . ? 
C5 H5 1.0000 . ? 
C6 C7 1.3929(18) . ? 
C6 C11 1.4044(19) . ? 
C7 C8 1.388(2) . ? 
C7 H7 0.9500 . ? 
C8 C9 1.391(2) . ? 
C8 H8 0.9500 . ? 
C9 O12 1.3571(17) . ? 
C9 C10 1.3995(19) . ? 
C10 C11 1.3755(19) . ? 
C10 H10 0.9500 . ? 
C11 H11 0.9500 . ? 
O12 C13 1.4343(18) . ? 
C13 H13A 0.9800 . ? 
C13 H13B 0.9800 . ? 
C13 H13C 0.9800 . ? 
O14 H14 0.8400 . ? 
C15 F17 1.3335(17) . ? 
C15 F16 1.3354(18) . ? 
C15 F18 1.3455(17) . ? 
C19 O20 1.1991(17) . ? 
C19 O21 1.3278(17) . ? 
O21 C22 1.4574(17) . ? 
C22 C23 1.497(2) . ? 
C22 H22A 0.9900 . ? 
C22 H22B 0.9900 . ? 
C23 H23A 0.9800 . ? 
C23 H23B 0.9800 . ? 
C23 H23C 0.9800 . ? 
 
loop_ 
 _geom_angle_atom_site_label_1 
 _geom_angle_atom_site_label_2 
 _geom_angle_atom_site_label_3 
 _geom_angle 
 _geom_angle_site_symmetry_1 
 _geom_angle_site_symmetry_3 
 _geom_angle_publ_flag 
C2 O1 C5 107.03(10) . . ? 
N3 C2 O1 116.84(12) . . ? 
N3 C2 C6 126.92(12) . . ? 
O1 C2 C6 116.25(11) . . ? 
C2 N3 C4 107.79(11) . . ? 
O14 C4 N3 113.02(11) . . ? 
O14 C4 C15 109.79(11) . . ? 
N3 C4 C15 108.59(11) . . ? 
O14 C4 C5 111.24(11) . . ? 
N3 C4 C5 104.09(10) . . ? 
C15 C4 C5 109.95(11) . . ? 
O1 C5 C19 109.75(11) . . ? 
O1 C5 C4 103.57(10) . . ? 
C19 C5 C4 111.62(10) . . ? 
O1 C5 H5 110.6 . . ? 
C19 C5 H5 110.6 . . ? 
C4 C5 H5 110.6 . . ? 
C7 C6 C11 119.15(12) . . ? 
C7 C6 C2 120.25(12) . . ? 
C11 C6 C2 120.59(12) . . ? 
C8 C7 C6 120.75(13) . . ? 
C8 C7 H7 119.6 . . ? 
C6 C7 H7 119.6 . . ? 
C7 C8 C9 119.61(12) . . ? 
C7 C8 H8 120.2 . . ? 
C9 C8 H8 120.2 . . ? 
O12 C9 C8 124.36(12) . . ? 
O12 C9 C10 115.62(12) . . ? 
C8 C9 C10 120.02(13) . . ? 
C11 C10 C9 120.18(13) . . ? 
C11 C10 H10 119.9 . . ? 
C9 C10 H10 119.9 . . ? 
C10 C11 C6 120.28(12) . . ? 
C10 C11 H11 119.9 . . ? 
C6 C11 H11 119.9 . . ? 
C9 O12 C13 117.05(12) . . ? 
O12 C13 H13A 109.5 . . ? 
O12 C13 H13B 109.5 . . ? 
H13A C13 H13B 109.5 . . ? 
O12 C13 H13C 109.5 . . ? 
H13A C13 H13C 109.5 . . ? 
H13B C13 H13C 109.5 . . ? 
C4 O14 H14 109.5 . . ? 
F17 C15 F16 107.96(12) . . ? 
F17 C15 F18 107.46(12) . . ? 
F16 C15 F18 106.71(12) . . ? 
F17 C15 C4 111.86(12) . . ? 
F16 C15 C4 111.56(12) . . ? 
F18 C15 C4 111.05(11) . . ? 
O20 C19 O21 126.71(13) . . ? 
O20 C19 C5 124.00(13) . . ? 
O21 C19 C5 109.29(11) . . ? 
C19 O21 C22 116.36(11) . . ? 
O21 C22 C23 107.48(14) . . ? 
O21 C22 H22A 110.2 . . ? 
C23 C22 H22A 110.2 . . ? 
O21 C22 H22B 110.2 . . ? 
C23 C22 H22B 110.2 . . ? 
H22A C22 H22B 108.5 . . ? 
C22 C23 H23A 109.5 . . ? 
C22 C23 H23B 109.5 . . ? 
H23A C23 H23B 109.5 . . ? 
C22 C23 H23C 109.5 . . ? 
H23A C23 H23C 109.5 . . ? 
H23B C23 H23C 109.5 . . ? 
 
loop_ 
 _geom_torsion_atom_site_label_1 
 _geom_torsion_atom_site_label_2 
 _geom_torsion_atom_site_label_3 
 _geom_torsion_atom_site_label_4 
 _geom_torsion 
 _geom_torsion_site_symmetry_1 
 _geom_torsion_site_symmetry_2 
 _geom_torsion_site_symmetry_3 
 _geom_torsion_site_symmetry_4 
 _geom_torsion_publ_flag 
C5 O1 C2 N3 -5.56(16) . . . . ? 
C5 O1 C2 C6 174.03(11) . . . . ? 
O1 C2 N3 C4 0.15(16) . . . . ? 
C6 C2 N3 C4 -179.38(12) . . . . ? 
C2 N3 C4 O14 125.67(12) . . . . ? 
C2 N3 C4 C15 -112.26(12) . . . . ? 
C2 N3 C4 C5 4.83(14) . . . . ? 
C2 O1 C5 C19 -111.44(11) . . . . ? 
C2 O1 C5 C4 7.86(13) . . . . ? 
O14 C4 C5 O1 -129.71(11) . . . . ? 
N3 C4 C5 O1 -7.70(13) . . . . ? 
C15 C4 C5 O1 108.46(12) . . . . ? 
O14 C4 C5 C19 -11.70(16) . . . . ? 
N3 C4 C5 C19 110.31(12) . . . . ? 
C15 C4 C5 C19 -133.53(12) . . . . ? 
N3 C2 C6 C7 174.55(13) . . . . ? 
O1 C2 C6 C7 -4.99(18) . . . . ? 
N3 C2 C6 C11 -4.1(2) . . . . ? 
O1 C2 C6 C11 176.32(11) . . . . ? 
C11 C6 C7 C8 1.0(2) . . . . ? 
C2 C6 C7 C8 -177.72(12) . . . . ? 
C6 C7 C8 C9 -0.5(2) . . . . ? 
C7 C8 C9 O12 179.66(13) . . . . ? 
C7 C8 C9 C10 -0.5(2) . . . . ? 
O12 C9 C10 C11 -179.18(12) . . . . ? 
C8 C9 C10 C11 1.0(2) . . . . ? 
C9 C10 C11 C6 -0.5(2) . . . . ? 
C7 C6 C11 C10 -0.5(2) . . . . ? 
C2 C6 C11 C10 178.19(12) . . . . ? 
C8 C9 O12 C13 -0.7(2) . . . . ? 
C10 C9 O12 C13 179.46(12) . . . . ? 
O14 C4 C15 F17 61.83(15) . . . . ? 
N3 C4 C15 F17 -62.19(14) . . . . ? 
C5 C4 C15 F17 -175.47(11) . . . . ? 
O14 C4 C15 F16 -59.22(15) . . . . ? 
N3 C4 C15 F16 176.76(11) . . . . ? 
C5 C4 C15 F16 63.48(15) . . . . ? 
O14 C4 C15 F18 -178.12(11) . . . . ? 
N3 C4 C15 F18 57.87(14) . . . . ? 
C5 C4 C15 F18 -55.42(15) . . . . ? 
O1 C5 C19 O20 15.57(17) . . . . ? 
C4 C5 C19 O20 -98.66(15) . . . . ? 
O1 C5 C19 O21 -165.04(10) . . . . ? 
C4 C5 C19 O21 80.73(13) . . . . ? 
O20 C19 O21 C22 9.0(2) . . . . ? 
C5 C19 O21 C22 -170.35(11) . . . . ? 
C19 O21 C22 C23 148.55(13) . . . . ? 

loop_ 
 _geom_hbond_atom_site_label_D 
 _geom_hbond_atom_site_label_H 
 _geom_hbond_atom_site_label_A 
 _geom_hbond_distance_DH 
 _geom_hbond_distance_HA 
 _geom_hbond_distance_DA 
 _geom_hbond_angle_DHA 
 _geom_hbond_site_symmetry_A
O14 H14 N3  0.84 1.90 2.7441(15) 177.4 3_665 

_diffrn_measured_fraction_theta_max    0.972 
_diffrn_reflns_theta_full              67.50 
_diffrn_measured_fraction_theta_full   0.997 
_refine_diff_density_max    0.233
_refine_diff_density_min   -0.226 
_refine_diff_density_rms    0.047 
