# Supplementary material
Source: publisher figshare collection journal article supplement (https://acs.figshare.com/ndownloader/files/4196539)
Supplement: Supplementary file 4 [file 4196539 › jo202201w_si_002/Cpd 4c.cif]

data_rpcjmf

_nottingham_internal_coll_name         RPCJMF
_nottingham_internal_coll_number       10522 
_nottingham_internal_coll_client       RP/CJM 
_nottingham_internal_coll_type         custom 
_nottingham_internal_coll_frame_time   '4 and 16' 
_nottingham_internal_coll_frame_width  '2.0000' 
_nottingham_internal_coll_frame_method '\w and \p scans' 
_nottingham_internal_coll_user         WL 
_nottingham_internal_coll_date         23/6/2011 
_nottingham_internal_process_user      WL 
_nottingham_internal_process_date      4/07/2011 
_nottingham_internal_solution_user     WL 
_nottingham_internal_solution_date     11/10/2011 
_nottingham_internal_refinement_user   WL 
_nottingham_internal_refinement_date   11/10/2011 
_nottingham_internal_validation_user   WL 
_nottingham_internal_validation_date   11/10/2011 
_nottingham_internal_archive_date      11/10/2011 

_refine_special_details 
; 
The sample was to found to consist entirely of intimately twinned 
crystals; despite numerous attempts to mount a crystal consisting of a 
single domain none could be found. Therefore a crystal consisting of
two domains was mounted and the twin domains deconvolted sing the 
twin processing facilities in CrysalisPro. The two twin domains were 
identified and then both integrated. A SHELX HKLF4 style reflection file 
was produced for initial solution, and a SHELX HKLF5 style reflection 
file was produced and used for the final structure refinement.
During post-integration processing reflections that were greater than 
0.8 overlapped were treated as fully overlapped reflections, while 
reflections with less overlap were decomposed to separate reflections. 
Unfortunately during post-integration a larger than usual number 
reflections were excluded as outliers, probably due to the twinning 
present, resulting in a lowering of the data completeness to 94.5%. 
Final determination of the unit cell gave poor precision on the 
deterimination of the unit cell parameters, due to refining the 
unit cell against two different reflection sets.
The twinning present also lowered the data quality, resulting in high 
wR2, R1, low C-C bond precision, and large difference density peaks and 
holes. 

; 
 
_audit_creation_method            'enCIFer editing of SHELXL-97 created file' 
_chemical_name_systematic         
; 
 ? 
; 
_chemical_name_common             ? 
_chemical_melting_point           ? 
_chemical_formula_moiety          'C14 H12 F3 N O4'  
_chemical_formula_sum             
'C14 H12 F3 N O4' 
_chemical_formula_weight          315.25 
 
loop_ 
 _atom_type_symbol 
 _atom_type_description 
 _atom_type_scat_dispersion_real 
 _atom_type_scat_dispersion_imag 
 _atom_type_scat_source 
 'C'  'C'   0.0181   0.0091 
 'International Tables Vol C Tables 4.2.6.8 and 6.1.1.4' 
 'H'  'H'   0.0000   0.0000 
 'International Tables Vol C Tables 4.2.6.8 and 6.1.1.4' 
 'N'  'N'   0.0311   0.0180 
 'International Tables Vol C Tables 4.2.6.8 and 6.1.1.4' 
 'O'  'O'   0.0492   0.0322 
 'International Tables Vol C Tables 4.2.6.8 and 6.1.1.4' 
 'F'  'F'   0.0727   0.0534 
 'International Tables Vol C Tables 4.2.6.8 and 6.1.1.4'  
 
_symmetry_cell_setting            triclinic 
_symmetry_space_group_name_H-M    'P -1' 
_symmetry_space_group_name_Hall   '-P 1' 
 
loop_ 
 _symmetry_equiv_pos_as_xyz 
 'x, y, z' 
 '-x, -y, -z'  
 
_cell_length_a                    4.499(2) 
_cell_length_b                    11.188(6) 
_cell_length_c                    13.464(12) 
_cell_angle_alpha                 91.14(8) 
_cell_angle_beta                  97.51(7) 
_cell_angle_gamma                 90.08(4) 
_cell_volume                      671.7(8) 
_cell_formula_units_Z             2 
_cell_measurement_temperature     90(2) 
_cell_measurement_reflns_used     1381 
_cell_measurement_theta_min       3.30 
_cell_measurement_theta_max       74.12 

_exptl_crystal_description        needle 
_exptl_crystal_colour             colorless 
_exptl_crystal_size_max           0.7602 
_exptl_crystal_size_mid           0.0887 
_exptl_crystal_size_min           0.0757 
_exptl_crystal_density_meas       ? 
_exptl_crystal_density_diffrn     1.559 
_exptl_crystal_density_method     'not measured' 
_exptl_crystal_F_000              324 
_exptl_absorpt_coefficient_mu     1.235 
_exptl_absorpt_correction_T_min   0.950 
_exptl_absorpt_correction_T_max   1.537 
_exptl_absorpt_correction_type    'gaussian' 
_exptl_absorpt_process_details    
;
CrysAlisPro, Agilent Technologies,
Version 1.171.35.15 (release 03-08-2011 CrysAlis171 .NET)
(compiled Aug  3 2011,13:03:54)
Numerical absorption correction based on gaussian integration over
			a multifaceted crystal model
; 

_diffrn_ambient_temperature       90(2)
_diffrn_radiation_wavelength      1.54184
_diffrn_radiation_type            'Cu K\a'
_diffrn_radiation_source          'SuperNova (Cu) X-ray Source'
_diffrn_radiation_monochromator   'mirror'
_diffrn_measurement_device_type   'SuperNova, Single source at offset), Atlas'
_diffrn_measurement_method        '\w and \p scans'
_diffrn_detector_area_resol_mean  10.3613
_diffrn_standards_number          0
_diffrn_standards_interval_count  .
_diffrn_standards_decay_%         0
_diffrn_reflns_number             3356 
_diffrn_reflns_av_R_equivalents   0.086 
_diffrn_reflns_av_sigmaI/netI     0.0197 
_diffrn_reflns_limit_h_min        -4 
_diffrn_reflns_limit_h_max        5 
_diffrn_reflns_limit_k_min        -13 
_diffrn_reflns_limit_k_max        13 
_diffrn_reflns_limit_l_min        -16 
_diffrn_reflns_limit_l_max        16 
_diffrn_reflns_theta_min          3.31 
_diffrn_reflns_theta_max          66.60 
_reflns_number_total              3356 
_reflns_number_gt                 2833 
_reflns_threshold_expression      I>2\s(I) 
 
_computing_data_collection       
;
CrysAlisPro, Agilent Technologies,
Version 1.171.35.11 (release 16-05-2011 CrysAlis171 .NET)
(compiled May 16 2011,17:55:39)
; 
_computing_cell_refinement       
;
CrysAlisPro, Agilent Technologies,
Version 1.171.35.11 (release 16-05-2011 CrysAlis171 .NET)
(compiled May 16 2011,17:55:39)
; 
_computing_data_reduction        
;
CrysAlisPro, Agilent Technologies,
Version 1.171.35.11 (release 16-05-2011 CrysAlis171 .NET)
(compiled May 16 2011,17:55:39)
; 
_computing_structure_solution    
;
  Olex2 1.1
  (compiled 2011.09.07 svn.r1971, GUI svn.r3853)
; 
_computing_structure_refinement  'SHELXL97 (Sheldrick, 2008)' 
_computing_molecular_graphics    ' ? ' 
_computing_publication_material  'enCIFer(Allen et al.,2004);PLATON(Spek,2003)' 

_refine_ls_structure_factor_coef  Fsqd  
_refine_ls_matrix_type            full 
_refine_ls_weighting_scheme       calc  
_refine_ls_weighting_details      
'calc w=1/[\s^2^(Fo^2^)+(0.2000P)^2^] where P=(Fo^2^+2Fc^2^)/3'
_atom_sites_solution_primary      iterative 
_atom_sites_solution_secondary    difmap 
_atom_sites_solution_hydrogens    mixed
_refine_ls_hydrogen_treatment     constr
_refine_ls_extinction_method      none 
_refine_ls_extinction_coef        ?  
_refine_ls_number_reflns          3356 
_refine_ls_number_parameters      202 
_refine_ls_number_restraints      0 
_refine_ls_R_factor_all           0.1224 
_refine_ls_R_factor_gt            0.1029 
_refine_ls_wR_factor_ref          0.3727 
_refine_ls_wR_factor_gt           0.3198 
_refine_ls_goodness_of_fit_ref    1.757 
_refine_ls_restrained_S_all       1.757 
_refine_ls_shift/su_max           0.000 
_refine_ls_shift/su_mean          0.000 
 
loop_ 
 _atom_site_label 
 _atom_site_type_symbol 
 _atom_site_fract_x 
 _atom_site_fract_y 
 _atom_site_fract_z 
 _atom_site_U_iso_or_equiv 
 _atom_site_adp_type 
 _atom_site_occupancy 
 _atom_site_symmetry_multiplicity 
 _atom_site_calc_flag 
 _atom_site_refinement_flags 
 _atom_site_disorder_assembly 
 _atom_site_disorder_group 
O1 O -0.1014(7) 0.4243(3) 0.1629(2) 0.0201(8) Uani 1 1 d . . . 
C2 C -0.1433(10) 0.4353(4) 0.2610(3) 0.0188(10) Uani 1 1 d . . . 
N3 N -0.0083(8) 0.3547(4) 0.3179(3) 0.0205(9) Uani 1 1 d . . . 
C4 C 0.1327(10) 0.2825(4) 0.2541(3) 0.0196(10) Uani 1 1 d . . . 
C5 C 0.0751(9) 0.3260(4) 0.1595(3) 0.0178(10) Uani 1 1 d . . . 
C6 C -0.3340(10) 0.5338(5) 0.2861(4) 0.0206(11) Uani 1 1 d . . . 
C7 C -0.3571(10) 0.5617(4) 0.3854(3) 0.0205(10) Uani 1 1 d . . . 
H7 H -0.2462 0.5169 0.4368 0.025 Uiso 1 1 calc R . . 
C8 C -0.5400(10) 0.6542(5) 0.4111(3) 0.0212(11) Uani 1 1 d . . . 
H8 H -0.5514 0.6742 0.4794 0.025 Uiso 1 1 calc R . . 
C9 C -0.7071(10) 0.7174(4) 0.3345(3) 0.0193(10) Uani 1 1 d . . . 
C10 C -0.6852(10) 0.6905(5) 0.2353(3) 0.0215(10) Uani 1 1 d . . . 
H10 H -0.7970 0.7350 0.1839 0.026 Uiso 1 1 calc R . . 
C11 C -0.5010(10) 0.5989(4) 0.2105(3) 0.0203(10) Uani 1 1 d . . . 
H11 H -0.4875 0.5801 0.1421 0.024 Uiso 1 1 calc R . . 
O12 O -0.8966(7) 0.8095(3) 0.3495(2) 0.0229(9) Uani 1 1 d . . . 
C13 C -0.9230(11) 0.8438(5) 0.4503(4) 0.0268(12) Uani 1 1 d . . . 
H13A H -1.0740 0.9067 0.4510 0.040 Uiso 1 1 calc R . . 
H13B H -0.7293 0.8737 0.4831 0.040 Uiso 1 1 calc R . . 
H13C H -0.9839 0.7744 0.4862 0.040 Uiso 1 1 calc R . . 
C14 C 0.3027(10) 0.1763(5) 0.2902(3) 0.0206(10) Uani 1 1 d . . . 
O15 O 0.3196(8) 0.1415(4) 0.3757(2) 0.0291(9) Uani 1 1 d . . . 
O16 O 0.4241(7) 0.1212(3) 0.2169(2) 0.0234(8) Uani 1 1 d . . . 
C17 C 0.5802(11) 0.0107(5) 0.2425(4) 0.0255(11) Uani 1 1 d . . . 
H17A H 0.4485 -0.0447 0.2733 0.031 Uiso 1 1 calc R . . 
H17B H 0.7617 0.0268 0.2909 0.031 Uiso 1 1 calc R . . 
C18 C 0.6651(12) -0.0433(5) 0.1481(4) 0.0291(12) Uani 1 1 d . . . 
H18A H 0.4839 -0.0586 0.1007 0.044 Uiso 1 1 calc R . . 
H18B H 0.7706 -0.1188 0.1630 0.044 Uiso 1 1 calc R . . 
H18C H 0.7967 0.0119 0.1186 0.044 Uiso 1 1 calc R . . 
C19 C 0.1485(10) 0.2885(5) 0.0582(3) 0.0208(11) Uani 1 1 d . . . 
F20 F 0.0247(6) 0.1840(3) 0.0277(2) 0.0281(8) Uani 1 1 d . . . 
F21 F 0.4385(6) 0.2814(3) 0.0541(2) 0.0301(9) Uani 1 1 d . . . 
F22 F 0.0358(7) 0.3691(3) -0.0092(2) 0.0316(8) Uani 1 1 d . . . 
 
loop_ 
 _atom_site_aniso_label 
 _atom_site_aniso_U_11 
 _atom_site_aniso_U_22 
 _atom_site_aniso_U_33 
 _atom_site_aniso_U_23 
 _atom_site_aniso_U_13 
 _atom_site_aniso_U_12 
O1 0.0178(16) 0.0223(18) 0.0196(16) 0.0012(13) 0.0002(12) -0.0046(13) 
C2 0.019(2) 0.018(2) 0.019(2) -0.0038(17) 0.0013(16) -0.0087(18) 
N3 0.019(2) 0.025(2) 0.0175(18) -0.0035(15) 0.0028(14) 0.0005(16) 
C4 0.016(2) 0.022(2) 0.020(2) -0.0037(17) 0.0025(16) -0.0089(19) 
C5 0.012(2) 0.018(2) 0.022(2) -0.0016(17) -0.0026(16) -0.0029(17) 
C6 0.015(2) 0.022(2) 0.025(2) -0.0017(18) 0.0016(16) -0.0065(19) 
C7 0.018(2) 0.022(2) 0.020(2) -0.0014(17) -0.0003(16) -0.0046(18) 
C8 0.023(2) 0.025(3) 0.016(2) -0.0015(17) 0.0012(16) -0.009(2) 
C9 0.014(2) 0.019(2) 0.024(2) -0.0031(18) 0.0018(16) -0.0062(18) 
C10 0.016(2) 0.027(3) 0.021(2) 0.0019(18) 0.0003(16) -0.0004(18) 
C11 0.018(2) 0.023(2) 0.019(2) -0.0018(17) 0.0011(16) -0.0056(19) 
O12 0.0242(18) 0.0250(19) 0.0191(17) -0.0048(13) 0.0020(12) 0.0018(14) 
C13 0.026(3) 0.030(3) 0.023(2) -0.006(2) 0.0008(18) -0.004(2) 
C14 0.017(2) 0.023(2) 0.021(2) -0.0002(17) -0.0015(16) 0.0001(18) 
O15 0.035(2) 0.035(2) 0.0178(17) 0.0005(14) 0.0048(13) 0.0053(16) 
O16 0.0282(19) 0.0217(18) 0.0204(16) 0.0008(12) 0.0034(12) 0.0040(14) 
C17 0.026(3) 0.025(3) 0.025(2) 0.0030(19) 0.0020(18) -0.003(2) 
C18 0.033(3) 0.027(3) 0.029(3) 0.002(2) 0.0077(19) 0.007(2) 
C19 0.017(2) 0.022(2) 0.022(2) 0.0028(18) -0.0001(17) -0.0008(19) 
F20 0.0278(16) 0.0308(17) 0.0258(15) -0.0117(12) 0.0058(11) -0.0109(13) 
F21 0.0157(15) 0.050(2) 0.0250(14) -0.0045(13) 0.0039(10) -0.0087(13) 
F22 0.0434(19) 0.0331(17) 0.0186(15) 0.0035(12) 0.0045(11) 0.0116(14) 
 
_geom_special_details 
; 
 All esds (except the esd in the dihedral angle between two l.s. planes) 
 are estimated using the full covariance matrix.  The cell esds are taken 
 into account individually in the estimation of esds in distances, angles 
 and torsion angles; correlations between esds in cell parameters are only 
 used when they are defined by crystal symmetry.  An approximate (isotropic) 
 treatment of cell esds is used for estimating esds involving l.s. planes. 
;
loop_ 
 _geom_bond_atom_site_label_1 
 _geom_bond_atom_site_label_2 
 _geom_bond_distance 
 _geom_bond_site_symmetry_2 
 _geom_bond_publ_flag 
O1 C5 1.361(6) . ? 
O1 C2 1.361(6) . ? 
C2 N3 1.295(7) . ? 
C2 C6 1.459(7) . ? 
N3 C4 1.382(6) . ? 
C4 C5 1.365(7) . ? 
C4 C14 1.470(7) . ? 
C5 C19 1.496(7) . ? 
C6 C7 1.384(7) . ? 
C6 C11 1.401(7) . ? 
C7 C8 1.390(7) . ? 
C7 H7 0.9500 . ? 
C8 C9 1.399(7) . ? 
C8 H8 0.9500 . ? 
C9 O12 1.367(6) . ? 
C9 C10 1.380(7) . ? 
C10 C11 1.382(7) . ? 
C10 H10 0.9500 . ? 
C11 H11 0.9500 . ? 
O12 C13 1.423(6) . ? 
C13 H13A 0.9800 . ? 
C13 H13B 0.9800 . ? 
C13 H13C 0.9800 . ? 
C14 O15 1.216(6) . ? 
C14 O16 1.330(6) . ? 
O16 C17 1.448(6) . ? 
C17 C18 1.492(8) . ? 
C17 H17A 0.9900 . ? 
C17 H17B 0.9900 . ? 
C18 H18A 0.9800 . ? 
C18 H18B 0.9800 . ? 
C18 H18C 0.9800 . ? 
C19 F21 1.315(6) . ? 
C19 F20 1.329(6) . ? 
C19 F22 1.344(6) . ? 
 
loop_ 
 _geom_angle_atom_site_label_1 
 _geom_angle_atom_site_label_2 
 _geom_angle_atom_site_label_3 
 _geom_angle 
 _geom_angle_site_symmetry_1 
 _geom_angle_site_symmetry_3 
 _geom_angle_publ_flag 
C5 O1 C2 104.2(4) . . ? 
N3 C2 O1 114.1(4) . . ? 
N3 C2 C6 129.8(4) . . ? 
O1 C2 C6 116.0(4) . . ? 
C2 N3 C4 104.9(4) . . ? 
C5 C4 N3 108.5(4) . . ? 
C5 C4 C14 129.9(4) . . ? 
N3 C4 C14 121.5(4) . . ? 
O1 C5 C4 108.2(4) . . ? 
O1 C5 C19 116.2(4) . . ? 
C4 C5 C19 135.5(5) . . ? 
C7 C6 C11 119.4(5) . . ? 
C7 C6 C2 120.0(4) . . ? 
C11 C6 C2 120.6(4) . . ? 
C6 C7 C8 121.0(4) . . ? 
C6 C7 H7 119.5 . . ? 
C8 C7 H7 119.5 . . ? 
C7 C8 C9 118.8(4) . . ? 
C7 C8 H8 120.6 . . ? 
C9 C8 H8 120.6 . . ? 
O12 C9 C10 114.7(4) . . ? 
O12 C9 C8 124.6(4) . . ? 
C10 C9 C8 120.7(5) . . ? 
C9 C10 C11 120.1(4) . . ? 
C9 C10 H10 119.9 . . ? 
C11 C10 H10 119.9 . . ? 
C10 C11 C6 120.1(4) . . ? 
C10 C11 H11 120.0 . . ? 
C6 C11 H11 120.0 . . ? 
C9 O12 C13 117.4(4) . . ? 
O12 C13 H13A 109.5 . . ? 
O12 C13 H13B 109.5 . . ? 
H13A C13 H13B 109.5 . . ? 
O12 C13 H13C 109.5 . . ? 
H13A C13 H13C 109.5 . . ? 
H13B C13 H13C 109.5 . . ? 
O15 C14 O16 124.7(5) . . ? 
O15 C14 C4 123.7(5) . . ? 
O16 C14 C4 111.6(4) . . ? 
C14 O16 C17 116.3(4) . . ? 
O16 C17 C18 107.5(4) . . ? 
O16 C17 H17A 110.2 . . ? 
C18 C17 H17A 110.2 . . ? 
O16 C17 H17B 110.2 . . ? 
C18 C17 H17B 110.2 . . ? 
H17A C17 H17B 108.5 . . ? 
C17 C18 H18A 109.5 . . ? 
C17 C18 H18B 109.5 . . ? 
H18A C18 H18B 109.5 . . ? 
C17 C18 H18C 109.5 . . ? 
H18A C18 H18C 109.5 . . ? 
H18B C18 H18C 109.5 . . ? 
F21 C19 F20 108.1(4) . . ? 
F21 C19 F22 107.6(4) . . ? 
F20 C19 F22 106.4(4) . . ? 
F21 C19 C5 113.1(4) . . ? 
F20 C19 C5 112.2(4) . . ? 
F22 C19 C5 109.1(4) . . ? 
 
loop_ 
 _geom_torsion_atom_site_label_1 
 _geom_torsion_atom_site_label_2 
 _geom_torsion_atom_site_label_3 
 _geom_torsion_atom_site_label_4 
 _geom_torsion 
 _geom_torsion_site_symmetry_1 
 _geom_torsion_site_symmetry_2 
 _geom_torsion_site_symmetry_3 
 _geom_torsion_site_symmetry_4 
 _geom_torsion_publ_flag 
C5 O1 C2 N3 0.7(5) . . . . ? 
C5 O1 C2 C6 -178.6(3) . . . . ? 
O1 C2 N3 C4 -0.8(5) . . . . ? 
C6 C2 N3 C4 178.3(4) . . . . ? 
C2 N3 C4 C5 0.6(5) . . . . ? 
C2 N3 C4 C14 -177.6(4) . . . . ? 
C2 O1 C5 C4 -0.2(4) . . . . ? 
C2 O1 C5 C19 177.5(4) . . . . ? 
N3 C4 C5 O1 -0.2(5) . . . . ? 
C14 C4 C5 O1 177.8(4) . . . . ? 
N3 C4 C5 C19 -177.3(5) . . . . ? 
C14 C4 C5 C19 0.7(8) . . . . ? 
N3 C2 C6 C7 9.5(7) . . . . ? 
O1 C2 C6 C7 -171.4(4) . . . . ? 
N3 C2 C6 C11 -168.9(4) . . . . ? 
O1 C2 C6 C11 10.3(6) . . . . ? 
C11 C6 C7 C8 -0.9(7) . . . . ? 
C2 C6 C7 C8 -179.2(4) . . . . ? 
C6 C7 C8 C9 1.5(7) . . . . ? 
C7 C8 C9 O12 179.5(4) . . . . ? 
C7 C8 C9 C10 -1.6(7) . . . . ? 
O12 C9 C10 C11 -179.9(4) . . . . ? 
C8 C9 C10 C11 1.2(7) . . . . ? 
C9 C10 C11 C6 -0.5(7) . . . . ? 
C7 C6 C11 C10 0.4(7) . . . . ? 
C2 C6 C11 C10 178.7(4) . . . . ? 
C10 C9 O12 C13 -178.4(4) . . . . ? 
C8 C9 O12 C13 0.5(6) . . . . ? 
C5 C4 C14 O15 -174.2(5) . . . . ? 
N3 C4 C14 O15 3.6(7) . . . . ? 
C5 C4 C14 O16 3.3(7) . . . . ? 
N3 C4 C14 O16 -178.9(4) . . . . ? 
O15 C14 O16 C17 1.5(7) . . . . ? 
C4 C14 O16 C17 -176.0(4) . . . . ? 
C14 O16 C17 C18 173.2(4) . . . . ? 
O1 C5 C19 F21 124.2(4) . . . . ? 
C4 C5 C19 F21 -58.9(7) . . . . ? 
O1 C5 C19 F20 -113.2(4) . . . . ? 
C4 C5 C19 F20 63.7(6) . . . . ? 
O1 C5 C19 F22 4.5(5) . . . . ? 
C4 C5 C19 F22 -178.6(4) . . . . ? 

_diffrn_measured_fraction_theta_max    0.946 
_diffrn_reflns_theta_full              66.60 
_diffrn_measured_fraction_theta_full   0.946 
_refine_diff_density_max    0.559
_refine_diff_density_min   -0.713 
_refine_diff_density_rms    0.137 
