# Supplementary material
Source: publisher figshare collection journal article supplement (https://acs.figshare.com/ndownloader/files/4196539)
Supplement: Supplementary file 4 [file 4196539 › jo202201w_si_002/Cpd 5b.cif]

data_RPCJMB

_nottingham_internal_coll_name         RPCJMB
_nottingham_internal_coll_number       10484 
_nottingham_internal_coll_client       RP/CJM 
_nottingham_internal_coll_type         custom 
_nottingham_internal_coll_frame_time   '12.0000 and 3.0000' 
_nottingham_internal_coll_frame_width  '1.0000' 
_nottingham_internal_coll_frame_method '\w scans' 
_nottingham_internal_coll_user         WL 
_nottingham_internal_coll_date         10/6/2011 
_nottingham_internal_process_user      WL 
_nottingham_internal_process_date      13/06/2011 
_nottingham_internal_solution_user     WL 
_nottingham_internal_solution_date     13/6/2011 
_nottingham_internal_refinement_user   WL 
_nottingham_internal_refinement_date   11/10/2011 
_nottingham_internal_validation_user   WL 
_nottingham_internal_validation_date   12/10/2011 
_nottingham_internal_archive_date      12/10/2011 

_refine_special_details 
; 
 Refinement of F^2^ against ALL reflections.  The weighted R-factor wR and 
 goodness of fit S are based on F^2^, conventional R-factors R are based 
 on F, with F set to zero for negative F^2^. The threshold expression of 
 F^2^ > 2sigma(F^2^) is used only for calculating R-factors(gt) etc. and is 
 not relevant to the choice of reflections for refinement.  R-factors based 
 on F^2^ are statistically about twice as large as those based on F, and R- 
 factors based on ALL data will be even larger. 
; 
 
_audit_creation_method            'enCIFer editing of SHELXL-97 created file' 
_chemical_name_systematic         
; 
 ? 
; 
_chemical_name_common             ? 
_chemical_melting_point           ? 
_chemical_formula_moiety          
'C13 H9 Br F3 N O3'  
_chemical_formula_sum             
'C13 H9 Br F3 N O3' 
_chemical_formula_weight          364.12 
 
loop_ 
 _atom_type_symbol 
 _atom_type_description 
 _atom_type_scat_dispersion_real 
 _atom_type_scat_dispersion_imag 
 _atom_type_scat_source 
 'C'  'C'   0.0181   0.0091 
 'International Tables Vol C Tables 4.2.6.8 and 6.1.1.4' 
 'H'  'H'   0.0000   0.0000 
 'International Tables Vol C Tables 4.2.6.8 and 6.1.1.4' 
 'N'  'N'   0.0311   0.0180 
 'International Tables Vol C Tables 4.2.6.8 and 6.1.1.4' 
 'O'  'O'   0.0492   0.0322 
 'International Tables Vol C Tables 4.2.6.8 and 6.1.1.4' 
 'F'  'F'   0.0727   0.0534 
 'International Tables Vol C Tables 4.2.6.8 and 6.1.1.4' 
 'Br'  'Br'  -0.6763   1.2805 
 'International Tables Vol C Tables 4.2.6.8 and 6.1.1.4'  
 
_symmetry_cell_setting            monoclinic 
_symmetry_space_group_name_H-M    'P 21/c' 
_symmetry_space_group_name_Hall   '-P 2ybc' 
 
loop_ 
 _symmetry_equiv_pos_as_xyz 
 'x, y, z' 
 '-x, y+1/2, -z+1/2' 
 '-x, -y, -z' 
 'x, -y-1/2, z-1/2'  
 
_cell_length_a                    11.6332(4) 
_cell_length_b                    7.9560(2) 
_cell_length_c                    15.6028(4) 
_cell_angle_alpha                 90.00 
_cell_angle_beta                  111.752(4) 
_cell_angle_gamma                 90.00 
_cell_volume                      1341.27(7) 
_cell_formula_units_Z             4 
_cell_measurement_temperature     90(2) 
_cell_measurement_reflns_used     10828 
_cell_measurement_theta_min       4.09 
_cell_measurement_theta_max       74.40 

_exptl_crystal_description        plate 
_exptl_crystal_colour             colourless 
_exptl_crystal_size_max           0.3699 
_exptl_crystal_size_mid           0.2290 
_exptl_crystal_size_min           0.0198 
_exptl_crystal_density_meas       ? 
_exptl_crystal_density_diffrn     1.803 
_exptl_crystal_density_method     'not measured' 
_exptl_crystal_F_000              720 
_exptl_absorpt_coefficient_mu     4.638 
_exptl_absorpt_correction_T_min   0.352 
_exptl_absorpt_correction_T_max   1.188 
_exptl_absorpt_correction_type    'gaussian' 
_exptl_absorpt_process_details    
;
CrysAlisPro, Agilent Technologies,
Version 1.171.35.11 (release 16-05-2011 CrysAlis171 .NET)
(compiled May 16 2011,17:55:39)
Numerical absorption correction based on gaussian integration over
			a multifaceted crystal model
; 

_diffrn_ambient_temperature       90(2)
_diffrn_radiation_wavelength      1.54184
_diffrn_radiation_type            'Cu K\a'
_diffrn_radiation_source          'SuperNova (Cu) X-ray Source'
_diffrn_radiation_monochromator   'mirror'
_diffrn_measurement_device_type   'SuperNova, Single source at offset), Atlas'
_diffrn_measurement_method        '\w scans'
_diffrn_detector_area_resol_mean  10.3613
_diffrn_standards_number          0
_diffrn_standards_interval_count  .
_diffrn_standards_decay_%         0
_diffrn_reflns_number             18843 
_diffrn_reflns_av_R_equivalents   0.0246 
_diffrn_reflns_av_sigmaI/netI     0.0111 
_diffrn_reflns_limit_h_min        -14 
_diffrn_reflns_limit_h_max        14 
_diffrn_reflns_limit_k_min        -9 
_diffrn_reflns_limit_k_max        9 
_diffrn_reflns_limit_l_min        -19 
_diffrn_reflns_limit_l_max        19 
_diffrn_reflns_theta_min          4.09 
_diffrn_reflns_theta_max          74.57 
_reflns_number_total              2713 
_reflns_number_gt                 2567 
_reflns_threshold_expression      I>2\s(I) 
 
_computing_data_collection       
;
CrysAlisPro, Agilent Technologies,
Version 1.171.35.11 (release 16-05-2011 CrysAlis171 .NET)
(compiled May 16 2011,17:55:39)
; 
_computing_cell_refinement       
;
CrysAlisPro, Agilent Technologies,
Version 1.171.35.11 (release 16-05-2011 CrysAlis171 .NET)
(compiled May 16 2011,17:55:39)
; 
_computing_data_reduction        
;
CrysAlisPro, Agilent Technologies,
Version 1.171.35.11 (release 16-05-2011 CrysAlis171 .NET)
(compiled May 16 2011,17:55:39)
; 
_computing_structure_solution    
;
  Olex2 1.1
  (compiled 2011.09.07 svn.r1971, GUI svn.r3853)
; 
_computing_structure_refinement  'SHELXL97 (Sheldrick, 2008)' 
_computing_molecular_graphics    ' ? ' 
_computing_publication_material  'enCIFer(Allen et al.,2004);PLATON(Spek,2003)' 

_refine_ls_structure_factor_coef  Fsqd  
_refine_ls_matrix_type            full 
_refine_ls_weighting_scheme       calc  
_refine_ls_weighting_details      
'calc w=1/[\s^2^(Fo^2^)+(0.0216P)^2^+4.6276P] where P=(Fo^2^+2Fc^2^)/3'
_atom_sites_solution_primary      iterative 
_atom_sites_solution_secondary    difmap 
_atom_sites_solution_hydrogens    mixed
_refine_ls_hydrogen_treatment     constr
_refine_ls_extinction_method      none 
_refine_ls_extinction_coef        ?  
_refine_ls_number_reflns          2713 
_refine_ls_number_parameters      191 
_refine_ls_number_restraints      0 
_refine_ls_R_factor_all           0.0340 
_refine_ls_R_factor_gt            0.0326 
_refine_ls_wR_factor_ref          0.0863 
_refine_ls_wR_factor_gt           0.0857 
_refine_ls_goodness_of_fit_ref    1.155 
_refine_ls_restrained_S_all       1.155 
_refine_ls_shift/su_max           0.001 
_refine_ls_shift/su_mean          0.000 
 
loop_ 
 _atom_site_label 
 _atom_site_type_symbol 
 _atom_site_fract_x 
 _atom_site_fract_y 
 _atom_site_fract_z 
 _atom_site_U_iso_or_equiv 
 _atom_site_adp_type 
 _atom_site_occupancy 
 _atom_site_symmetry_multiplicity 
 _atom_site_calc_flag 
 _atom_site_refinement_flags 
 _atom_site_disorder_assembly 
 _atom_site_disorder_group 
O1 O 0.53011(18) 0.8846(3) 0.36063(14) 0.0170(4) Uani 1 1 d . . . 
C2 C 0.5380(3) 0.7973(4) 0.43720(19) 0.0165(6) Uani 1 1 d . . . 
N3 N 0.6451(2) 0.7252(3) 0.47840(17) 0.0169(5) Uani 1 1 d . . . 
C4 C 0.7125(3) 0.7676(4) 0.4256(2) 0.0167(6) Uani 1 1 d . . . 
C5 C 0.6427(3) 0.8645(4) 0.3534(2) 0.0174(6) Uani 1 1 d . . . 
C6 C 0.4333(3) 0.7921(4) 0.4679(2) 0.0170(6) Uani 1 1 d . . . 
C7 C 0.3196(3) 0.8755(4) 0.42620(19) 0.0172(6) Uani 1 1 d . . . 
C8 C 0.2266(3) 0.8586(4) 0.4619(2) 0.0212(6) Uani 1 1 d . . . 
H8 H 0.1495 0.9138 0.4327 0.025 Uiso 1 1 calc R . . 
C9 C 0.2463(3) 0.7618(4) 0.5400(2) 0.0218(6) Uani 1 1 d . . . 
H9 H 0.1828 0.7512 0.5643 0.026 Uiso 1 1 calc R . . 
C10 C 0.3587(3) 0.6804(4) 0.5827(2) 0.0209(6) Uani 1 1 d . . . 
H10 H 0.3726 0.6147 0.6365 0.025 Uiso 1 1 calc R . . 
C11 C 0.4503(3) 0.6952(4) 0.5467(2) 0.0181(6) Uani 1 1 d . . . 
H11 H 0.5267 0.6384 0.5761 0.022 Uiso 1 1 calc R . . 
Br12 Br 0.27894(3) 1.01173(4) 0.31907(2) 0.02344(11) Uani 1 1 d . . . 
C13 C 0.8447(3) 0.7124(4) 0.4528(2) 0.0209(6) Uani 1 1 d . . . 
F14 F 0.86261(17) 0.6129(3) 0.39034(13) 0.0284(4) Uani 1 1 d . . . 
F15 F 0.92187(16) 0.8431(3) 0.46536(14) 0.0291(4) Uani 1 1 d . . . 
F16 F 0.88210(17) 0.6275(3) 0.53214(13) 0.0314(5) Uani 1 1 d . . . 
C17 C 0.6596(3) 0.9545(4) 0.2763(2) 0.0185(6) Uani 1 1 d . . . 
O18 O 0.5822(2) 1.0447(3) 0.22341(14) 0.0223(5) Uani 1 1 d . . . 
O19 O 0.77122(19) 0.9219(3) 0.27572(15) 0.0225(5) Uani 1 1 d . . . 
C20 C 0.8032(3) 1.0093(5) 0.2048(2) 0.0260(7) Uani 1 1 d . . . 
H20A H 0.7719 1.1262 0.1976 0.031 Uiso 1 1 calc R . . 
H20B H 0.7659 0.9510 0.1448 0.031 Uiso 1 1 calc R . . 
C21 C 0.9410(3) 1.0084(5) 0.2359(2) 0.0288(7) Uani 1 1 d . . . 
H21A H 0.9659 1.0651 0.1898 0.043 Uiso 1 1 calc R . . 
H21B H 0.9708 0.8921 0.2433 0.043 Uiso 1 1 calc R . . 
H21C H 0.9767 1.0674 0.2950 0.043 Uiso 1 1 calc R . . 
 
loop_ 
 _atom_site_aniso_label 
 _atom_site_aniso_U_11 
 _atom_site_aniso_U_22 
 _atom_site_aniso_U_33 
 _atom_site_aniso_U_23 
 _atom_site_aniso_U_13 
 _atom_site_aniso_U_12 
O1 0.0177(10) 0.0171(10) 0.0170(10) 0.0000(8) 0.0074(8) 0.0004(8) 
C2 0.0211(14) 0.0131(14) 0.0149(13) -0.0030(11) 0.0062(11) -0.0021(11) 
N3 0.0179(12) 0.0171(12) 0.0168(12) -0.0006(10) 0.0078(10) -0.0003(10) 
C4 0.0188(14) 0.0149(14) 0.0173(13) -0.0009(11) 0.0077(11) -0.0013(11) 
C5 0.0175(13) 0.0165(14) 0.0183(14) -0.0016(11) 0.0069(11) -0.0005(11) 
C6 0.0182(14) 0.0156(14) 0.0185(14) -0.0042(11) 0.0081(11) -0.0023(11) 
C7 0.0204(14) 0.0155(14) 0.0147(13) -0.0017(11) 0.0053(11) -0.0005(11) 
C8 0.0178(14) 0.0210(15) 0.0239(15) -0.0041(13) 0.0067(12) 0.0010(12) 
C9 0.0226(15) 0.0225(16) 0.0245(15) -0.0061(13) 0.0135(13) -0.0037(12) 
C10 0.0254(15) 0.0184(15) 0.0207(15) -0.0002(12) 0.0107(12) -0.0027(12) 
C11 0.0195(14) 0.0164(14) 0.0186(14) -0.0014(11) 0.0072(11) -0.0005(11) 
Br12 0.02024(17) 0.02733(19) 0.02195(18) 0.00548(13) 0.00689(13) 0.00433(12) 
C13 0.0198(14) 0.0239(16) 0.0204(14) 0.0028(12) 0.0092(12) 0.0021(12) 
F14 0.0269(10) 0.0310(11) 0.0304(10) -0.0042(8) 0.0141(8) 0.0078(8) 
F15 0.0185(9) 0.0287(10) 0.0389(11) -0.0012(9) 0.0094(8) -0.0046(8) 
F16 0.0237(9) 0.0471(13) 0.0244(10) 0.0161(9) 0.0099(8) 0.0118(9) 
C17 0.0207(14) 0.0175(14) 0.0183(14) -0.0030(12) 0.0082(12) -0.0016(12) 
O18 0.0238(11) 0.0240(11) 0.0180(10) 0.0037(9) 0.0063(9) 0.0019(9) 
O19 0.0217(11) 0.0284(12) 0.0207(11) 0.0069(9) 0.0116(9) 0.0025(9) 
C20 0.0236(16) 0.0372(19) 0.0200(15) 0.0088(14) 0.0113(13) -0.0005(14) 
C21 0.0259(17) 0.0337(19) 0.0285(17) 0.0028(15) 0.0118(14) -0.0033(14) 
 
_geom_special_details 
; 
 All esds (except the esd in the dihedral angle between two l.s. planes) 
 are estimated using the full covariance matrix.  The cell esds are taken 
 into account individually in the estimation of esds in distances, angles 
 and torsion angles; correlations between esds in cell parameters are only 
 used when they are defined by crystal symmetry.  An approximate (isotropic) 
 treatment of cell esds is used for estimating esds involving l.s. planes. 
;
loop_ 
 _geom_bond_atom_site_label_1 
 _geom_bond_atom_site_label_2 
 _geom_bond_distance 
 _geom_bond_site_symmetry_2 
 _geom_bond_publ_flag 
O1 C2 1.355(3) . ? 
O1 C5 1.365(3) . ? 
C2 N3 1.305(4) . ? 
C2 C6 1.466(4) . ? 
N3 C4 1.374(4) . ? 
C4 C5 1.358(4) . ? 
C4 C13 1.502(4) . ? 
C5 C17 1.474(4) . ? 
C6 C11 1.401(4) . ? 
C6 C7 1.406(4) . ? 
C7 C8 1.395(4) . ? 
C7 Br12 1.899(3) . ? 
C8 C9 1.387(5) . ? 
C8 H8 0.9500 . ? 
C9 C10 1.389(5) . ? 
C9 H9 0.9500 . ? 
C10 C11 1.381(4) . ? 
C10 H10 0.9500 . ? 
C11 H11 0.9500 . ? 
C13 F14 1.331(4) . ? 
C13 F16 1.333(4) . ? 
C13 F15 1.339(4) . ? 
C17 O18 1.206(4) . ? 
C17 O19 1.328(4) . ? 
O19 C20 1.467(4) . ? 
C20 C21 1.492(5) . ? 
C20 H20A 0.9900 . ? 
C20 H20B 0.9900 . ? 
C21 H21A 0.9800 . ? 
C21 H21B 0.9800 . ? 
C21 H21C 0.9800 . ? 
 
loop_ 
 _geom_angle_atom_site_label_1 
 _geom_angle_atom_site_label_2 
 _geom_angle_atom_site_label_3 
 _geom_angle 
 _geom_angle_site_symmetry_1 
 _geom_angle_site_symmetry_3 
 _geom_angle_publ_flag 
C2 O1 C5 105.1(2) . . ? 
N3 C2 O1 113.6(2) . . ? 
N3 C2 C6 125.7(3) . . ? 
O1 C2 C6 120.7(3) . . ? 
C2 N3 C4 104.4(2) . . ? 
C5 C4 N3 109.8(3) . . ? 
C5 C4 C13 129.5(3) . . ? 
N3 C4 C13 120.7(3) . . ? 
C4 C5 O1 107.1(2) . . ? 
C4 C5 C17 137.2(3) . . ? 
O1 C5 C17 115.6(2) . . ? 
C11 C6 C7 118.0(3) . . ? 
C11 C6 C2 116.0(3) . . ? 
C7 C6 C2 126.0(3) . . ? 
C8 C7 C6 120.3(3) . . ? 
C8 C7 Br12 115.5(2) . . ? 
C6 C7 Br12 124.2(2) . . ? 
C9 C8 C7 120.3(3) . . ? 
C9 C8 H8 119.8 . . ? 
C7 C8 H8 119.8 . . ? 
C8 C9 C10 120.0(3) . . ? 
C8 C9 H9 120.0 . . ? 
C10 C9 H9 120.0 . . ? 
C11 C10 C9 119.7(3) . . ? 
C11 C10 H10 120.1 . . ? 
C9 C10 H10 120.1 . . ? 
C10 C11 C6 121.6(3) . . ? 
C10 C11 H11 119.2 . . ? 
C6 C11 H11 119.2 . . ? 
F14 C13 F16 107.0(3) . . ? 
F14 C13 F15 106.9(2) . . ? 
F16 C13 F15 106.7(3) . . ? 
F14 C13 C4 112.8(3) . . ? 
F16 C13 C4 111.0(2) . . ? 
F15 C13 C4 112.0(3) . . ? 
O18 C17 O19 126.6(3) . . ? 
O18 C17 C5 123.8(3) . . ? 
O19 C17 C5 109.7(3) . . ? 
C17 O19 C20 115.8(2) . . ? 
O19 C20 C21 107.2(3) . . ? 
O19 C20 H20A 110.3 . . ? 
C21 C20 H20A 110.3 . . ? 
O19 C20 H20B 110.3 . . ? 
C21 C20 H20B 110.3 . . ? 
H20A C20 H20B 108.5 . . ? 
C20 C21 H21A 109.5 . . ? 
C20 C21 H21B 109.5 . . ? 
H21A C21 H21B 109.5 . . ? 
C20 C21 H21C 109.5 . . ? 
H21A C21 H21C 109.5 . . ? 
H21B C21 H21C 109.5 . . ? 
 
loop_ 
 _geom_torsion_atom_site_label_1 
 _geom_torsion_atom_site_label_2 
 _geom_torsion_atom_site_label_3 
 _geom_torsion_atom_site_label_4 
 _geom_torsion 
 _geom_torsion_site_symmetry_1 
 _geom_torsion_site_symmetry_2 
 _geom_torsion_site_symmetry_3 
 _geom_torsion_site_symmetry_4 
 _geom_torsion_publ_flag 
C5 O1 C2 N3 0.2(3) . . . . ? 
C5 O1 C2 C6 179.2(3) . . . . ? 
O1 C2 N3 C4 0.0(3) . . . . ? 
C6 C2 N3 C4 -178.9(3) . . . . ? 
C2 N3 C4 C5 -0.2(3) . . . . ? 
C2 N3 C4 C13 177.8(3) . . . . ? 
N3 C4 C5 O1 0.3(3) . . . . ? 
C13 C4 C5 O1 -177.5(3) . . . . ? 
N3 C4 C5 C17 176.8(3) . . . . ? 
C13 C4 C5 C17 -0.9(6) . . . . ? 
C2 O1 C5 C4 -0.3(3) . . . . ? 
C2 O1 C5 C17 -177.7(2) . . . . ? 
N3 C2 C6 C11 -2.5(4) . . . . ? 
O1 C2 C6 C11 178.7(3) . . . . ? 
N3 C2 C6 C7 177.0(3) . . . . ? 
O1 C2 C6 C7 -1.8(4) . . . . ? 
C11 C6 C7 C8 -1.2(4) . . . . ? 
C2 C6 C7 C8 179.4(3) . . . . ? 
C11 C6 C7 Br12 -179.8(2) . . . . ? 
C2 C6 C7 Br12 0.7(4) . . . . ? 
C6 C7 C8 C9 1.2(5) . . . . ? 
Br12 C7 C8 C9 179.9(2) . . . . ? 
C7 C8 C9 C10 -0.3(5) . . . . ? 
C8 C9 C10 C11 -0.5(5) . . . . ? 
C9 C10 C11 C6 0.5(5) . . . . ? 
C7 C6 C11 C10 0.3(4) . . . . ? 
C2 C6 C11 C10 179.9(3) . . . . ? 
C5 C4 C13 F14 -64.3(4) . . . . ? 
N3 C4 C13 F14 118.2(3) . . . . ? 
C5 C4 C13 F16 175.6(3) . . . . ? 
N3 C4 C13 F16 -1.9(4) . . . . ? 
C5 C4 C13 F15 56.4(4) . . . . ? 
N3 C4 C13 F15 -121.1(3) . . . . ? 
C4 C5 C17 O18 -174.3(3) . . . . ? 
O1 C5 C17 O18 2.0(4) . . . . ? 
C4 C5 C17 O19 5.0(5) . . . . ? 
O1 C5 C17 O19 -178.7(2) . . . . ? 
O18 C17 O19 C20 1.9(5) . . . . ? 
C5 C17 O19 C20 -177.4(3) . . . . ? 
C17 O19 C20 C21 159.5(3) . . . . ? 

_diffrn_measured_fraction_theta_max    0.987 
_diffrn_reflns_theta_full              67.50 
_diffrn_measured_fraction_theta_full   1.000 
_refine_diff_density_max    0.751
_refine_diff_density_min   -0.459 
_refine_diff_density_rms    0.086 
