# Supplementary material
Source: publisher figshare collection journal article supplement (https://acs.figshare.com/ndownloader/files/4196539)
Supplement: Supplementary file 4 [file 4196539 › jo202201w_si_002/Cpd 5c.cif]

data_rpcjmd

_nottingham_internal_coll_name         RPCJMD
_nottingham_internal_coll_number       10503 
_nottingham_internal_coll_client       RP/CJM 
_nottingham_internal_coll_type         custom 
_nottingham_internal_coll_frame_time   '12.0000 and 3.0000' 
_nottingham_internal_coll_frame_width  '1.0000' 
_nottingham_internal_coll_frame_method '\w scans' 
_nottingham_internal_coll_user         WL 
_nottingham_internal_coll_date         176/2011 
_nottingham_internal_process_user      WL 
_nottingham_internal_process_date      17/06/2011 
_nottingham_internal_solution_user     WL 
_nottingham_internal_solution_date     22/6/2011 
_nottingham_internal_refinement_user   WL 
_nottingham_internal_refinement_date   23/6/2011 
_nottingham_internal_validation_user   WL 
_nottingham_internal_validation_date   23/6/2011 
_nottingham_internal_archive_date      23/6/2011 

_refine_special_details 
; 
 Refinement of F^2^ against ALL reflections.  The weighted R-factor wR and 
 goodness of fit S are based on F^2^, conventional R-factors R are based 
 on F, with F set to zero for negative F^2^. The threshold expression of 
 F^2^ > 2sigma(F^2^) is used only for calculating R-factors(gt) etc. and is 
 not relevant to the choice of reflections for refinement.  R-factors based 
 on F^2^ are statistically about twice as large as those based on F, and R- 
 factors based on ALL data will be even larger. 
; 
 
_audit_creation_method            'enCIFer editing of SHELXL-97 created file' 
_chemical_name_systematic         
; 
 ? 
; 
_chemical_name_common             ? 
_chemical_melting_point           ? 
_chemical_formula_moiety          'C14 H12 F3 N O4'  
_chemical_formula_sum             
'C14 H12 F3 N O4' 
_chemical_formula_weight          315.25 
 
loop_ 
 _atom_type_symbol 
 _atom_type_description 
 _atom_type_scat_dispersion_real 
 _atom_type_scat_dispersion_imag 
 _atom_type_scat_source 
 'C'  'C'   0.0181   0.0091 
 'International Tables Vol C Tables 4.2.6.8 and 6.1.1.4' 
 'H'  'H'   0.0000   0.0000 
 'International Tables Vol C Tables 4.2.6.8 and 6.1.1.4' 
 'N'  'N'   0.0311   0.0180 
 'International Tables Vol C Tables 4.2.6.8 and 6.1.1.4' 
 'O'  'O'   0.0492   0.0322 
 'International Tables Vol C Tables 4.2.6.8 and 6.1.1.4' 
 'F'  'F'   0.0727   0.0534 
 'International Tables Vol C Tables 4.2.6.8 and 6.1.1.4'  
 
_symmetry_cell_setting            triclinic 
_symmetry_space_group_name_H-M    'P -1' 
_symmetry_space_group_name_Hall   '-P 1' 
 
loop_ 
 _symmetry_equiv_pos_as_xyz 
 'x, y, z' 
 '-x, -y, -z'  
 
_cell_length_a                    7.8560(14) 
_cell_length_b                    8.957(2) 
_cell_length_c                    10.209(3) 
_cell_angle_alpha                 91.807(19) 
_cell_angle_beta                  98.090(18) 
_cell_angle_gamma                 101.202(17) 
_cell_volume                      696.4(3) 
_cell_formula_units_Z             2 
_cell_measurement_temperature     90(2) 
_cell_measurement_reflns_used     1360 
_cell_measurement_theta_min       4.38 
_cell_measurement_theta_max       81.32 

_exptl_crystal_description        tablet 
_exptl_crystal_colour             colourless 
_exptl_crystal_size_max           0.42 
_exptl_crystal_size_mid           0.25 
_exptl_crystal_size_min           0.05 
_exptl_crystal_density_meas       ? 
_exptl_crystal_density_diffrn     1.503 
_exptl_crystal_density_method     'not measured' 
_exptl_crystal_F_000              324 
_exptl_absorpt_coefficient_mu     1.192 
_exptl_absorpt_correction_T_min   0.414 
_exptl_absorpt_correction_T_max   1.000 
_exptl_absorpt_correction_type    'multi-scan' 
_exptl_absorpt_process_details    
;
CrysAlisPro, Agilent Technologies,
Version 1.171.35.11 (release 16-05-2011 CrysAlis171 .NET)
(compiled May 16 2011,17:55:39)
Empirical absorption correction using spherical harmonics,
 implemented in SCALE3 ABSPACK scaling algorithm.
; 

_diffrn_ambient_temperature       90(2)
_diffrn_radiation_wavelength      1.54184
_diffrn_radiation_type            'Cu K\a'
_diffrn_radiation_source          'SuperNova (Cu) X-ray Source'
_diffrn_radiation_monochromator   'mirror'
_diffrn_measurement_device_type   'SuperNova, Single source at offset), Atlas'
_diffrn_measurement_method        '\w scans'
_diffrn_detector_area_resol_mean  10.3613
_diffrn_standards_number          0
_diffrn_standards_interval_count  .
_diffrn_standards_decay_%         0
_diffrn_reflns_number             4413 
_diffrn_reflns_av_R_equivalents   0.0634 
_diffrn_reflns_av_sigmaI/netI     0.0596 
_diffrn_reflns_limit_h_min        -9 
_diffrn_reflns_limit_h_max        9 
_diffrn_reflns_limit_k_min        -10 
_diffrn_reflns_limit_k_max        8 
_diffrn_reflns_limit_l_min        -12 
_diffrn_reflns_limit_l_max        12 
_diffrn_reflns_theta_min          4.38 
_diffrn_reflns_theta_max          66.59 
_reflns_number_total              2415 
_reflns_number_gt                 1821 
_reflns_threshold_expression      I>2\s(I) 
 
_computing_data_collection       
;
CrysAlisPro, Agilent Technologies,
Version 1.171.35.11 (release 16-05-2011 CrysAlis171 .NET)
(compiled May 16 2011,17:55:39)
; 
_computing_cell_refinement       
;
CrysAlisPro, Agilent Technologies,
Version 1.171.35.11 (release 16-05-2011 CrysAlis171 .NET)
(compiled May 16 2011,17:55:39)
; 
_computing_data_reduction        
;
CrysAlisPro, Agilent Technologies,
Version 1.171.35.11 (release 16-05-2011 CrysAlis171 .NET)
(compiled May 16 2011,17:55:39)
; 
_computing_structure_solution    ' ? ' 
_computing_structure_refinement  'SHELXL97 (Sheldrick, 2008)' 
_computing_molecular_graphics    ' ? ' 
_computing_publication_material  'enCIFer(Allen et al.,2004);PLATON(Spek,2003)' 

_refine_ls_structure_factor_coef  Fsqd  
_refine_ls_matrix_type            full 
_refine_ls_weighting_scheme       calc  
_refine_ls_weighting_details      
'calc w=1/[\s^2^(Fo^2^)+(0.2000P)^2^+0.0000P] where P=(Fo^2^+2Fc^2^)/3'
_atom_sites_solution_primary      iterative 
_atom_sites_solution_secondary    difmap 
_atom_sites_solution_hydrogens    mixed
_refine_ls_hydrogen_treatment     constr
_refine_ls_extinction_method      none 
_refine_ls_extinction_coef        ?  
_refine_ls_number_reflns          2415 
_refine_ls_number_parameters      201 
_refine_ls_number_restraints      0 
_refine_ls_R_factor_all           0.1346 
_refine_ls_R_factor_gt            0.1165 
_refine_ls_wR_factor_ref          0.3692 
_refine_ls_wR_factor_gt           0.3485 
_refine_ls_goodness_of_fit_ref    1.491 
_refine_ls_restrained_S_all       1.491 
_refine_ls_shift/su_max           0.000 
_refine_ls_shift/su_mean          0.000 
 
loop_ 
 _atom_site_label 
 _atom_site_type_symbol 
 _atom_site_fract_x 
 _atom_site_fract_y 
 _atom_site_fract_z 
 _atom_site_U_iso_or_equiv 
 _atom_site_adp_type 
 _atom_site_occupancy 
 _atom_site_symmetry_multiplicity 
 _atom_site_calc_flag 
 _atom_site_refinement_flags 
 _atom_site_disorder_assembly 
 _atom_site_disorder_group 
O1 O 0.4120(5) 0.1690(4) 0.5242(4) 0.0345(10) Uani 1 1 d . . . 
C2 C 0.5339(7) 0.2820(5) 0.4842(6) 0.0320(13) Uani 1 1 d . . . 
N3 N 0.5303(5) 0.2818(5) 0.3570(5) 0.0284(11) Uani 1 1 d . . . 
C4 C 0.3965(6) 0.1603(6) 0.3050(6) 0.0312(13) Uani 1 1 d . . . 
C5 C 0.3233(7) 0.0908(6) 0.4078(6) 0.0315(13) Uani 1 1 d . . . 
C6 C 0.6505(7) 0.3850(6) 0.5879(6) 0.0307(12) Uani 1 1 d . . . 
C7 C 0.6503(7) 0.3632(6) 0.7218(6) 0.0324(13) Uani 1 1 d . . . 
H7 H 0.5667 0.2833 0.7491 0.039 Uiso 1 1 calc R . . 
C8 C 0.7710(7) 0.4573(6) 0.8156(6) 0.0351(13) Uani 1 1 d . . . 
H8 H 0.7712 0.4414 0.9072 0.042 Uiso 1 1 calc R . . 
C9 C 0.8941(7) 0.5771(6) 0.7753(6) 0.0320(13) Uani 1 1 d . . . 
C10 C 0.8923(7) 0.6015(6) 0.6427(5) 0.0288(12) Uani 1 1 d . . . 
H10 H 0.9733 0.6834 0.6154 0.035 Uiso 1 1 calc R . . 
C11 C 0.7704(7) 0.5046(6) 0.5481(6) 0.0301(12) Uani 1 1 d . . . 
H11 H 0.7694 0.5206 0.4565 0.036 Uiso 1 1 calc R . . 
O12 O 1.0086(5) 0.6608(4) 0.8763(4) 0.0377(11) Uani 1 1 d . . . 
C13 C 1.1370(8) 0.7819(7) 0.8397(6) 0.0408(14) Uani 1 1 d . . . 
H13A H 1.2085 0.7404 0.7821 0.061 Uiso 1 1 calc R . . 
H13B H 1.2125 0.8328 0.9196 0.061 Uiso 1 1 calc R . . 
H13C H 1.0780 0.8556 0.7923 0.061 Uiso 1 1 calc R . . 
C14 C 0.3642(7) 0.1188(6) 0.1621(6) 0.0343(13) Uani 1 1 d . . . 
F15 F 0.1961(4) 0.0847(4) 0.1095(4) 0.0442(10) Uani 1 1 d . . . 
F16 F 0.4326(5) -0.0025(4) 0.1338(4) 0.0486(10) Uani 1 1 d . . . 
F17 F 0.4416(5) 0.2322(4) 0.0930(4) 0.0459(10) Uani 1 1 d . . . 
C18 C 0.1818(6) -0.0420(6) 0.4245(5) 0.0281(12) Uani 1 1 d . . . 
O19 O 0.1598(5) -0.0863(4) 0.5311(4) 0.0348(10) Uani 1 1 d . . . 
O20 O 0.0916(5) -0.0959(4) 0.3081(4) 0.0337(10) Uani 1 1 d . . . 
C21 C -0.0524(7) -0.2287(6) 0.3145(6) 0.0356(13) Uani 1 1 d . . . 
H21A H -0.1289 -0.2049 0.3781 0.043 Uiso 1 1 calc R . . 
H21B H -0.0036 -0.3182 0.3438 0.043 Uiso 1 1 calc R . . 
C22 C -0.1551(8) -0.2621(6) 0.1777(6) 0.0401(14) Uani 1 1 d . . . 
H22A H -0.0763 -0.2787 0.1147 0.060 Uiso 1 1 calc R . . 
H22B H -0.2094 -0.1755 0.1523 0.060 Uiso 1 1 calc R . . 
H22C H -0.2467 -0.3538 0.1767 0.060 Uiso 1 1 calc R . . 
 
loop_ 
 _atom_site_aniso_label 
 _atom_site_aniso_U_11 
 _atom_site_aniso_U_22 
 _atom_site_aniso_U_33 
 _atom_site_aniso_U_23 
 _atom_site_aniso_U_13 
 _atom_site_aniso_U_12 
O1 0.032(2) 0.0212(19) 0.047(2) -0.0003(15) 0.0019(16) -0.0012(15) 
C2 0.023(2) 0.012(2) 0.057(4) 0.003(2) -0.004(2) -0.0004(19) 
N3 0.0181(19) 0.016(2) 0.045(3) 0.0016(17) -0.0017(17) -0.0045(15) 
C4 0.017(2) 0.020(2) 0.050(3) 0.005(2) -0.002(2) -0.0081(18) 
C5 0.028(2) 0.022(3) 0.041(3) 0.001(2) -0.001(2) 0.000(2) 
C6 0.026(3) 0.021(2) 0.044(3) 0.000(2) 0.001(2) 0.005(2) 
C7 0.028(3) 0.019(2) 0.047(3) 0.003(2) 0.004(2) -0.001(2) 
C8 0.033(3) 0.029(3) 0.040(3) 0.006(2) 0.002(2) 0.001(2) 
C9 0.026(3) 0.024(3) 0.043(3) -0.004(2) 0.001(2) 0.002(2) 
C10 0.026(2) 0.016(2) 0.041(3) -0.0013(19) 0.001(2) -0.0011(19) 
C11 0.029(3) 0.018(2) 0.038(3) 0.002(2) -0.001(2) -0.003(2) 
O12 0.035(2) 0.029(2) 0.039(2) -0.0017(16) -0.0056(16) -0.0078(16) 
C13 0.033(3) 0.039(3) 0.044(3) -0.001(3) 0.002(2) -0.007(2) 
C14 0.022(2) 0.029(3) 0.050(4) 0.008(2) 0.006(2) 0.000(2) 
F15 0.0263(16) 0.050(2) 0.046(2) 0.0044(15) -0.0059(13) -0.0089(14) 
F16 0.057(2) 0.039(2) 0.050(2) -0.0025(16) 0.0055(17) 0.0140(17) 
F17 0.0390(18) 0.041(2) 0.048(2) 0.0124(15) 0.0014(14) -0.0135(15) 
C18 0.023(2) 0.022(3) 0.036(3) -0.001(2) -0.003(2) 0.004(2) 
O19 0.0322(19) 0.0258(19) 0.042(2) 0.0015(16) 0.0013(16) -0.0005(15) 
O20 0.0297(19) 0.0240(19) 0.042(2) 0.0010(15) -0.0015(15) -0.0038(15) 
C21 0.033(3) 0.026(3) 0.041(3) 0.003(2) 0.001(2) -0.008(2) 
C22 0.034(3) 0.029(3) 0.049(4) -0.003(2) 0.001(2) -0.008(2) 
 
_geom_special_details 
; 
 All esds (except the esd in the dihedral angle between two l.s. planes) 
 are estimated using the full covariance matrix.  The cell esds are taken 
 into account individually in the estimation of esds in distances, angles 
 and torsion angles; correlations between esds in cell parameters are only 
 used when they are defined by crystal symmetry.  An approximate (isotropic) 
 treatment of cell esds is used for estimating esds involving l.s. planes. 
;
loop_ 
 _geom_bond_atom_site_label_1 
 _geom_bond_atom_site_label_2 
 _geom_bond_distance 
 _geom_bond_site_symmetry_2 
 _geom_bond_publ_flag 
O1 C2 1.367(7) . ? 
O1 C5 1.383(7) . ? 
C2 N3 1.295(8) . ? 
C2 C6 1.466(7) . ? 
N3 C4 1.391(6) . ? 
C4 C5 1.375(8) . ? 
C4 C14 1.468(9) . ? 
C5 C18 1.495(7) . ? 
C6 C7 1.387(9) . ? 
C6 C11 1.394(7) . ? 
C7 C8 1.383(8) . ? 
C7 H7 0.9500 . ? 
C8 C9 1.411(8) . ? 
C8 H8 0.9500 . ? 
C9 O12 1.365(6) . ? 
C9 C10 1.377(9) . ? 
C10 C11 1.402(7) . ? 
C10 H10 0.9500 . ? 
C11 H11 0.9500 . ? 
O12 C13 1.428(7) . ? 
C13 H13A 0.9800 . ? 
C13 H13B 0.9800 . ? 
C13 H13C 0.9800 . ? 
C14 F15 1.327(6) . ? 
C14 F16 1.343(7) . ? 
C14 F17 1.350(6) . ? 
C18 O19 1.193(7) . ? 
C18 O20 1.319(7) . ? 
O20 C21 1.483(6) . ? 
C21 C22 1.501(8) . ? 
C21 H21A 0.9900 . ? 
C21 H21B 0.9900 . ? 
C22 H22A 0.9800 . ? 
C22 H22B 0.9800 . ? 
C22 H22C 0.9800 . ? 
 
loop_ 
 _geom_angle_atom_site_label_1 
 _geom_angle_atom_site_label_2 
 _geom_angle_atom_site_label_3 
 _geom_angle 
 _geom_angle_site_symmetry_1 
 _geom_angle_site_symmetry_3 
 _geom_angle_publ_flag 
C2 O1 C5 104.5(4) . . ? 
N3 C2 O1 114.1(4) . . ? 
N3 C2 C6 128.8(5) . . ? 
O1 C2 C6 117.2(5) . . ? 
C2 N3 C4 105.3(4) . . ? 
C5 C4 N3 108.7(5) . . ? 
C5 C4 C14 130.9(5) . . ? 
N3 C4 C14 120.1(5) . . ? 
C4 C5 O1 107.3(4) . . ? 
C4 C5 C18 137.4(5) . . ? 
O1 C5 C18 115.3(5) . . ? 
C7 C6 C11 119.8(5) . . ? 
C7 C6 C2 122.5(5) . . ? 
C11 C6 C2 117.7(5) . . ? 
C8 C7 C6 120.3(5) . . ? 
C8 C7 H7 119.9 . . ? 
C6 C7 H7 119.9 . . ? 
C7 C8 C9 119.9(5) . . ? 
C7 C8 H8 120.0 . . ? 
C9 C8 H8 120.0 . . ? 
O12 C9 C10 125.2(5) . . ? 
O12 C9 C8 114.8(5) . . ? 
C10 C9 C8 120.0(5) . . ? 
C9 C10 C11 119.6(5) . . ? 
C9 C10 H10 120.2 . . ? 
C11 C10 H10 120.2 . . ? 
C6 C11 C10 120.3(5) . . ? 
C6 C11 H11 119.8 . . ? 
C10 C11 H11 119.8 . . ? 
C9 O12 C13 116.6(5) . . ? 
O12 C13 H13A 109.5 . . ? 
O12 C13 H13B 109.5 . . ? 
H13A C13 H13B 109.5 . . ? 
O12 C13 H13C 109.5 . . ? 
H13A C13 H13C 109.5 . . ? 
H13B C13 H13C 109.5 . . ? 
F15 C14 F16 106.4(4) . . ? 
F15 C14 F17 106.6(5) . . ? 
F16 C14 F17 105.6(5) . . ? 
F15 C14 C4 114.6(5) . . ? 
F16 C14 C4 111.5(5) . . ? 
F17 C14 C4 111.6(4) . . ? 
O19 C18 O20 128.0(5) . . ? 
O19 C18 C5 121.9(5) . . ? 
O20 C18 C5 110.2(5) . . ? 
C18 O20 C21 114.2(4) . . ? 
O20 C21 C22 107.2(5) . . ? 
O20 C21 H21A 110.3 . . ? 
C22 C21 H21A 110.3 . . ? 
O20 C21 H21B 110.3 . . ? 
C22 C21 H21B 110.3 . . ? 
H21A C21 H21B 108.5 . . ? 
C21 C22 H22A 109.5 . . ? 
C21 C22 H22B 109.5 . . ? 
H22A C22 H22B 109.5 . . ? 
C21 C22 H22C 109.5 . . ? 
H22A C22 H22C 109.5 . . ? 
H22B C22 H22C 109.5 . . ? 
 
loop_ 
 _geom_torsion_atom_site_label_1 
 _geom_torsion_atom_site_label_2 
 _geom_torsion_atom_site_label_3 
 _geom_torsion_atom_site_label_4 
 _geom_torsion 
 _geom_torsion_site_symmetry_1 
 _geom_torsion_site_symmetry_2 
 _geom_torsion_site_symmetry_3 
 _geom_torsion_site_symmetry_4 
 _geom_torsion_publ_flag 
C5 O1 C2 N3 -0.2(6) . . . . ? 
C5 O1 C2 C6 -179.6(4) . . . . ? 
O1 C2 N3 C4 0.1(6) . . . . ? 
C6 C2 N3 C4 179.5(5) . . . . ? 
C2 N3 C4 C5 0.0(6) . . . . ? 
C2 N3 C4 C14 -175.3(5) . . . . ? 
N3 C4 C5 O1 -0.1(6) . . . . ? 
C14 C4 C5 O1 174.5(5) . . . . ? 
N3 C4 C5 C18 -178.9(6) . . . . ? 
C14 C4 C5 C18 -4.3(11) . . . . ? 
C2 O1 C5 C4 0.2(6) . . . . ? 
C2 O1 C5 C18 179.3(4) . . . . ? 
N3 C2 C6 C7 -173.9(5) . . . . ? 
O1 C2 C6 C7 5.5(8) . . . . ? 
N3 C2 C6 C11 3.3(9) . . . . ? 
O1 C2 C6 C11 -177.3(5) . . . . ? 
C11 C6 C7 C8 -1.6(8) . . . . ? 
C2 C6 C7 C8 175.5(5) . . . . ? 
C6 C7 C8 C9 0.7(8) . . . . ? 
C7 C8 C9 O12 -178.9(5) . . . . ? 
C7 C8 C9 C10 0.9(8) . . . . ? 
O12 C9 C10 C11 178.3(5) . . . . ? 
C8 C9 C10 C11 -1.4(8) . . . . ? 
C7 C6 C11 C10 1.0(8) . . . . ? 
C2 C6 C11 C10 -176.2(5) . . . . ? 
C9 C10 C11 C6 0.5(8) . . . . ? 
C10 C9 O12 C13 -0.6(8) . . . . ? 
C8 C9 O12 C13 179.2(5) . . . . ? 
C5 C4 C14 F15 47.9(8) . . . . ? 
N3 C4 C14 F15 -138.0(5) . . . . ? 
C5 C4 C14 F16 -73.0(7) . . . . ? 
N3 C4 C14 F16 101.1(6) . . . . ? 
C5 C4 C14 F17 169.2(6) . . . . ? 
N3 C4 C14 F17 -16.7(7) . . . . ? 
C4 C5 C18 O19 171.4(6) . . . . ? 
O1 C5 C18 O19 -7.3(8) . . . . ? 
C4 C5 C18 O20 -9.2(9) . . . . ? 
O1 C5 C18 O20 172.0(4) . . . . ? 
O19 C18 O20 C21 -0.8(8) . . . . ? 
C5 C18 O20 C21 179.9(4) . . . . ? 
C18 O20 C21 C22 172.7(5) . . . . ? 

_diffrn_measured_fraction_theta_max    0.979 
_diffrn_reflns_theta_full              66.59 
_diffrn_measured_fraction_theta_full   0.979 
_refine_diff_density_max    0.693
_refine_diff_density_min   -0.607 
_refine_diff_density_rms    0.155 
