# Supplementary material
Source: publisher figshare collection journal article supplement (https://acs.figshare.com/ndownloader/files/4196539)
Supplement: Supplementary file 4 [file 4196539 › jo202201w_si_002/Cpd 7c.cif]

data_MHCJMG

_nottingham_internal_coll_name         MHCJMG
_nottingham_internal_coll_number       10331 
_nottingham_internal_coll_client       MH/CJM 
_nottingham_internal_coll_type         custom 
_nottingham_internal_coll_frame_time   '3 and 5' 
_nottingham_internal_coll_frame_width  '2' 
_nottingham_internal_coll_frame_method '\w scans' 
_nottingham_internal_coll_user         WL 
_nottingham_internal_coll_date         6/4/2011 
_nottingham_internal_process_user      WL 
_nottingham_internal_process_date      06/04/2011 
_nottingham_internal_solution_user     WL
_nottingham_internal_solution_date     6/4/2011
_nottingham_internal_refinement_user   WL
_nottingham_internal_refinement_date   6/4/2011
_nottingham_internal_validation_user   WL
_nottingham_internal_validation_date   8/4/2011
_nottingham_internal_archive_date      8/4/2011

_refine_special_details 
; 
 Refinement of F^2^ against ALL reflections.  The weighted R-factor wR and 
 goodness of fit S are based on F^2^, conventional R-factors R are based 
 on F, with F set to zero for negative F^2^. The threshold expression of 
 F^2^ > 2sigma(F^2^) is used only for calculating R-factors(gt) etc. and is 
 not relevant to the choice of reflections for refinement.  R-factors based 
 on F^2^ are statistically about twice as large as those based on F, and R- 
 factors based on ALL data will be even larger. 
; 
 
_audit_creation_method            'enCIFer editing of SHELXL-97 created file' 
_chemical_name_systematic         
; 
 ? 
; 
_chemical_name_common             ? 
_chemical_melting_point           ? 
_chemical_formula_moiety          'C14 H9 F6 N O2 S'
_chemical_formula_sum             
'C14 H9 F6 N O2 S' 
_chemical_formula_weight          369.28 
 
loop_ 
 _atom_type_symbol 
 _atom_type_description 
 _atom_type_scat_dispersion_real 
 _atom_type_scat_dispersion_imag 
 _atom_type_scat_source 
 'C'  'C'   0.0181   0.0091 
 'International Tables Vol C Tables 4.2.6.8 and 6.1.1.4' 
 'H'  'H'   0.0000   0.0000 
 'International Tables Vol C Tables 4.2.6.8 and 6.1.1.4' 
 'N'  'N'   0.0311   0.0180 
 'International Tables Vol C Tables 4.2.6.8 and 6.1.1.4' 
 'O'  'O'   0.0492   0.0322 
 'International Tables Vol C Tables 4.2.6.8 and 6.1.1.4' 
 'F'  'F'   0.0727   0.0534 
 'International Tables Vol C Tables 4.2.6.8 and 6.1.1.4' 
 'S'  'S'   0.3331   0.5567 
 'International Tables Vol C Tables 4.2.6.8 and 6.1.1.4'  
 
_symmetry_cell_setting            monoclinic 
_symmetry_space_group_name_H-M    'C 2/c' 
_symmetry_space_group_name_Hall   '-C 2yc'
 
loop_ 
 _symmetry_equiv_pos_as_xyz 
 'x, y, z' 
 '-x, y, -z+1/2' 
 'x+1/2, y+1/2, z' 
 '-x+1/2, y+1/2, -z+1/2' 
 '-x, -y, -z' 
 'x, -y, z-1/2' 
 '-x+1/2, -y+1/2, -z' 
 'x+1/2, -y+1/2, z-1/2'  
 
_cell_length_a                    21.5600(16) 
_cell_length_b                    14.2595(16) 
_cell_length_c                    29.844(2) 
_cell_angle_alpha                 90.00 
_cell_angle_beta                  107.941(8) 
_cell_angle_gamma                 90.00 
_cell_volume                      8729.0(14) 
_cell_formula_units_Z             24 
_cell_measurement_temperature     90(2) 
_cell_measurement_reflns_used     4831 
_cell_measurement_theta_min       3.77 
_cell_measurement_theta_max       74.61 

_exptl_crystal_description        block 
_exptl_crystal_colour             colourless 
_exptl_crystal_size_max           0.8903 
_exptl_crystal_size_mid           0.6279 
_exptl_crystal_size_min           0.5744 
_exptl_crystal_density_meas       ? 
_exptl_crystal_density_diffrn     1.686 
_exptl_crystal_density_method     ? 
_exptl_crystal_F_000              4464 
_exptl_absorpt_coefficient_mu     2.750 
_exptl_absorpt_correction_T_min   0.171 
_exptl_absorpt_correction_T_max   1.259 
_exptl_absorpt_correction_type    'gaussian' 
_exptl_absorpt_process_details    
;
CrysAlisPro, Oxford Diffraction Ltd., 
Version 1.171.34.36 (release 02-08-2010 CrysAlis171 .NET) 
(compiled Jan  5 2010,16:28:46) 
Analytical numeric absorption correction using a multifaceted crystal 
model based on expressions derived by R.C. Clark & J.S. Reid. 
(Clark, R. C. & Reid, J. S. (1995). Acta Cryst. A51, 887-897) 
; 

_diffrn_ambient_temperature       90(2)
_diffrn_radiation_wavelength      1.5418
_diffrn_radiation_type            'Cu K\a'
_diffrn_radiation_source          'SuperNova (Cu) X-ray Source'
_diffrn_radiation_monochromator   'mirror'
_diffrn_measurement_device_type   'SuperNova, Single source at offset), Atlas'
_diffrn_measurement_method        '\w scans'
_diffrn_detector_area_resol_mean  10.3613
_diffrn_standards_number          0
_diffrn_standards_interval_count  .
_diffrn_standards_decay_%         0
_diffrn_reflns_number             16595 
_diffrn_reflns_av_R_equivalents   0.0327 
_diffrn_reflns_av_sigmaI/netI     0.0359 
_diffrn_reflns_limit_h_min        -26 
_diffrn_reflns_limit_h_max        25 
_diffrn_reflns_limit_k_min        -17 
_diffrn_reflns_limit_k_max        17 
_diffrn_reflns_limit_l_min        -29 
_diffrn_reflns_limit_l_max        36 
_diffrn_reflns_theta_min          3.78 
_diffrn_reflns_theta_max          74.78 
_reflns_number_total              8540 
_reflns_number_gt                 7474 
_reflns_threshold_expression      I>2\s(I) 
 
_computing_data_collection       
;
CrysAlisPro, Oxford Diffraction Ltd.,
Version 1.171.34.36 (release 02-08-2010 CrysAlis171 .NET)
(compiled Nov  6 2009,16:24:50)
; 
_computing_cell_refinement       
;
CrysAlisPro, Oxford Diffraction Ltd.,
Version 1.171.34.36 (release 02-08-2010 CrysAlis171 .NET)
(compiled Nov  6 2009,16:24:50)
; 
_computing_data_reduction        
;
CrysAlisPro, Oxford Diffraction Ltd.,
Version 1.171.34.36 (release 02-08-2010 CrysAlis171 .NET)
(compiled Nov  6 2009,16:24:50)
; 
_computing_structure_solution    'smtbx-flip (Bourhis, 2008)'
_computing_structure_refinement  'SHELXL97 (Sheldrick, 2008)' 
_computing_molecular_graphics    ' ? ' 
_computing_publication_material  'enCIFer(Allen et al.,2004);PLATON(Spek,2003)' 

_refine_ls_structure_factor_coef  Fsqd  
_refine_ls_matrix_type            full 
_refine_ls_weighting_scheme       calc  
_refine_ls_weighting_details      
'calc w=1/[\s^2^(Fo^2^)+(0.0572P)^2^+34.7354P] where P=(Fo^2^+2Fc^2^)/3'
_atom_sites_solution_primary      other 
_atom_sites_solution_secondary    difmap 
_atom_sites_solution_hydrogens    geom
_refine_ls_hydrogen_treatment     constr
_refine_ls_extinction_method      none 
_refine_ls_extinction_coef        ?  
_refine_ls_number_reflns          8540 
_refine_ls_number_parameters      652 
_refine_ls_number_restraints      0 
_refine_ls_R_factor_all           0.0613 
_refine_ls_R_factor_gt            0.0533 
_refine_ls_wR_factor_ref          0.1386 
_refine_ls_wR_factor_gt           0.1333 
_refine_ls_goodness_of_fit_ref    1.080 
_refine_ls_restrained_S_all       1.080 
_refine_ls_shift/su_max           0.001 
_refine_ls_shift/su_mean          0.000 
 
loop_ 
 _atom_site_label 
 _atom_site_type_symbol 
 _atom_site_fract_x 
 _atom_site_fract_y 
 _atom_site_fract_z 
 _atom_site_U_iso_or_equiv 
 _atom_site_adp_type 
 _atom_site_occupancy 
 _atom_site_symmetry_multiplicity 
 _atom_site_calc_flag 
 _atom_site_refinement_flags 
 _atom_site_disorder_assembly 
 _atom_site_disorder_group 
S1 S 0.58067(3) 0.68499(5) 0.57660(2) 0.01778(15) Uani 1 1 d . . . 
C2 C 0.54574(13) 0.57861(19) 0.58169(9) 0.0164(5) Uani 1 1 d . . . 
N3 N 0.50500(11) 0.58078(17) 0.60714(8) 0.0180(5) Uani 1 1 d . . . 
C4 C 0.50115(13) 0.6691(2) 0.62328(9) 0.0175(5) Uani 1 1 d . . . 
C5 C 0.53861(13) 0.7355(2) 0.61061(9) 0.0181(5) Uani 1 1 d . . . 
C6 C 0.56066(13) 0.49300(19) 0.55979(9) 0.0170(5) Uani 1 1 d . . . 
C7 C 0.60025(14) 0.4958(2) 0.53056(10) 0.0202(6) Uani 1 1 d . . . 
H7 H 0.6169 0.5540 0.5239 0.024 Uiso 1 1 calc R . . 
C8 C 0.61531(14) 0.4142(2) 0.51137(10) 0.0223(6) Uani 1 1 d . . . 
H8 H 0.6423 0.4163 0.4916 0.027 Uiso 1 1 calc R . . 
C9 C 0.59109(14) 0.3291(2) 0.52093(9) 0.0206(6) Uani 1 1 d . . . 
C10 C 0.55057(15) 0.3262(2) 0.54947(10) 0.0225(6) Uani 1 1 d . . . 
H10 H 0.5332 0.2680 0.5555 0.027 Uiso 1 1 calc R . . 
C11 C 0.53584(14) 0.4073(2) 0.56882(10) 0.0220(6) Uani 1 1 d . . . 
H11 H 0.5086 0.4049 0.5885 0.026 Uiso 1 1 calc R . . 
C12 C 0.60888(16) 0.2395(2) 0.50157(10) 0.0257(6) Uani 1 1 d . . . 
F1 F 0.55698(11) 0.18396(14) 0.48361(8) 0.0434(5) Uani 1 1 d . . . 
F2 F 0.65124(11) 0.18842(15) 0.53386(7) 0.0443(6) Uani 1 1 d . . . 
F3 F 0.63345(15) 0.25426(16) 0.46642(9) 0.0549(7) Uani 1 1 d . . . 
C13 C 0.45629(14) 0.6854(2) 0.65267(10) 0.0210(6) Uani 1 1 d . . . 
F4 F 0.42156(11) 0.60872(15) 0.65381(8) 0.0426(5) Uani 1 1 d . . . 
F5 F 0.48854(8) 0.70678(13) 0.69702(6) 0.0255(4) Uani 1 1 d . . . 
F6 F 0.41383(9) 0.75417(15) 0.63553(6) 0.0339(4) Uani 1 1 d . . . 
C14 C 0.54373(13) 0.83726(19) 0.62170(9) 0.0179(5) Uani 1 1 d . . . 
O1 O 0.52246(11) 0.87357(14) 0.65012(7) 0.0251(5) Uani 1 1 d . . . 
O2 O 0.57656(10) 0.88095(13) 0.59638(7) 0.0194(4) Uani 1 1 d . . . 
C15 C 0.58598(14) 0.98165(19) 0.60463(10) 0.0202(6) Uani 1 1 d . . . 
H15A H 0.6256 1.0020 0.5972 0.024 Uiso 1 1 calc R . . 
H15B H 0.5923 0.9955 0.6382 0.024 Uiso 1 1 calc R . . 
C16 C 0.52775(15) 1.0348(2) 0.57439(10) 0.0248(6) Uani 1 1 d . . . 
H16A H 0.5232 1.0240 0.5411 0.037 Uiso 1 1 calc R . . 
H16B H 0.5338 1.1019 0.5813 0.037 Uiso 1 1 calc R . . 
H16C H 0.4884 1.0130 0.5810 0.037 Uiso 1 1 calc R . . 
S21 S 0.22331(3) 0.33793(4) 0.39781(2) 0.01665(15) Uani 1 1 d . . . 
C22 C 0.21332(13) 0.45055(19) 0.41510(9) 0.0159(5) Uani 1 1 d . . . 
N23 N 0.18504(11) 0.45710(16) 0.44840(8) 0.0175(5) Uani 1 1 d . . . 
C24 C 0.17077(13) 0.37027(19) 0.46096(9) 0.0169(5) Uani 1 1 d . . . 
C25 C 0.18748(13) 0.2963(2) 0.43790(9) 0.0165(5) Uani 1 1 d . . . 
C26 C 0.23393(13) 0.53396(19) 0.39448(9) 0.0159(5) Uani 1 1 d . . . 
C27 C 0.26890(14) 0.5272(2) 0.36216(9) 0.0188(5) Uani 1 1 d . . . 
H27 H 0.2796 0.4674 0.3526 0.023 Uiso 1 1 calc R . . 
C28 C 0.28785(14) 0.6075(2) 0.34419(10) 0.0202(6) Uani 1 1 d . . . 
H28 H 0.3119 0.6027 0.3224 0.024 Uiso 1 1 calc R . . 
C29 C 0.27220(13) 0.6949(2) 0.35761(9) 0.0179(5) Uani 1 1 d . . . 
C30 C 0.23672(14) 0.7022(2) 0.38957(10) 0.0199(6) Uani 1 1 d . . . 
H30 H 0.2255 0.7622 0.3986 0.024 Uiso 1 1 calc R . . 
C31 C 0.21798(14) 0.6221(2) 0.40799(10) 0.0200(6) Uani 1 1 d . . . 
H31 H 0.1942 0.6270 0.4299 0.024 Uiso 1 1 calc R . . 
C32 C 0.29253(15) 0.7822(2) 0.33825(10) 0.0238(6) Uani 1 1 d . . . 
F21 F 0.30810(11) 0.76705(14) 0.29900(6) 0.0376(5) Uani 1 1 d . . . 
F22 F 0.34381(13) 0.82285(16) 0.36804(7) 0.0524(7) Uani 1 1 d . . . 
F23 F 0.24403(13) 0.84462(16) 0.32592(10) 0.0578(7) Uani 1 1 d . . . 
C33 C 0.13702(14) 0.3648(2) 0.49837(9) 0.0187(5) Uani 1 1 d . . . 
F24 F 0.12068(9) 0.44999(12) 0.50945(6) 0.0255(4) Uani 1 1 d . . . 
F25 F 0.17523(8) 0.32636(12) 0.53830(5) 0.0226(4) Uani 1 1 d . . . 
F26 F 0.08217(8) 0.31434(12) 0.48437(6) 0.0238(4) Uani 1 1 d . . . 
C34 C 0.17454(13) 0.19504(19) 0.44199(9) 0.0175(5) Uani 1 1 d . . . 
O21 O 0.16192(11) 0.16054(14) 0.47491(7) 0.0242(4) Uani 1 1 d . . . 
O22 O 0.17743(10) 0.14987(14) 0.40344(7) 0.0205(4) Uani 1 1 d . . . 
C35 C 0.16010(15) 0.0508(2) 0.40052(11) 0.0233(6) Uani 1 1 d . . . 
H35A H 0.1455 0.0313 0.3671 0.028 Uiso 1 1 calc R . . 
H35B H 0.1233 0.0414 0.4134 0.028 Uiso 1 1 calc R . . 
C36 C 0.21669(16) -0.0096(2) 0.42740(11) 0.0265(6) Uani 1 1 d . . . 
H36A H 0.2542 0.0028 0.4163 0.040 Uiso 1 1 calc R . . 
H36B H 0.2044 -0.0759 0.4223 0.040 Uiso 1 1 calc R . . 
H36C H 0.2282 0.0049 0.4611 0.040 Uiso 1 1 calc R . . 
S41 S 0.11506(3) 0.67282(5) 0.26197(2) 0.01732(15) Uani 1 1 d . . . 
C42 C 0.13568(13) 0.55706(19) 0.25790(9) 0.0164(5) Uani 1 1 d . . . 
N43 N 0.17602(11) 0.54278(16) 0.23304(8) 0.0171(5) Uani 1 1 d . . . 
C44 C 0.19137(13) 0.6252(2) 0.21661(9) 0.0166(5) Uani 1 1 d . . . 
C45 C 0.16334(13) 0.7040(2) 0.22831(9) 0.0171(5) Uani 1 1 d . . . 
C46 C 0.10830(13) 0.48136(19) 0.27919(9) 0.0165(5) Uani 1 1 d . . . 
C47 C 0.06372(14) 0.5004(2) 0.30367(10) 0.0218(6) Uani 1 1 d . . . 
H47 H 0.0529 0.5635 0.3083 0.026 Uiso 1 1 calc R . . 
C48 C 0.03547(15) 0.4278(2) 0.32104(10) 0.0229(6) Uani 1 1 d . . . 
H48 H 0.0051 0.4409 0.3375 0.027 Uiso 1 1 calc R . . 
C49 C 0.05140(13) 0.3360(2) 0.31448(9) 0.0183(5) Uani 1 1 d . . . 
C50 C 0.09653(14) 0.3162(2) 0.29105(10) 0.0202(6) Uani 1 1 d . . . 
H50 H 0.1078 0.2530 0.2870 0.024 Uiso 1 1 calc R . . 
C51 C 0.12509(13) 0.3888(2) 0.27355(10) 0.0192(5) Uani 1 1 d . . . 
H51 H 0.1561 0.3755 0.2577 0.023 Uiso 1 1 calc R . . 
C52 C 0.02018(14) 0.2582(2) 0.33360(10) 0.0226(6) Uani 1 1 d . . . 
F41 F -0.04462(9) 0.26611(16) 0.32098(8) 0.0419(5) Uani 1 1 d . . . 
F42 F 0.04014(9) 0.25623(14) 0.38086(6) 0.0309(4) Uani 1 1 d . . . 
F43 F 0.03325(12) 0.17314(14) 0.32004(8) 0.0425(5) Uani 1 1 d . . . 
C53 C 0.23751(14) 0.6228(2) 0.18724(10) 0.0191(6) Uani 1 1 d . . . 
F44 F 0.25233(9) 0.53495(12) 0.17950(6) 0.0271(4) Uani 1 1 d . . . 
F45 F 0.21284(9) 0.66323(13) 0.14544(6) 0.0251(4) Uani 1 1 d . . . 
F46 F 0.29412(8) 0.66569(13) 0.20947(6) 0.0270(4) Uani 1 1 d . . . 
C54 C 0.17009(14) 0.8031(2) 0.21549(9) 0.0186(5) Uani 1 1 d . . . 
O41 O 0.20563(11) 0.82930(15) 0.19387(8) 0.0260(5) Uani 1 1 d . . . 
O42 O 0.13054(10) 0.85828(14) 0.23061(7) 0.0223(4) Uani 1 1 d . . . 
C55 C 0.13344(14) 0.9572(2) 0.21983(11) 0.0217(6) Uani 1 1 d . . . 
H55A H 0.1214 0.9666 0.1853 0.026 Uiso 1 1 calc R . . 
H55B H 0.1781 0.9816 0.2344 0.026 Uiso 1 1 calc R . . 
C56 C 0.08608(16) 1.0074(2) 0.23938(13) 0.0309(7) Uani 1 1 d . . . 
H56A H 0.0421 0.9826 0.2247 0.046 Uiso 1 1 calc R . . 
H56B H 0.0867 1.0746 0.2327 0.046 Uiso 1 1 calc R . . 
H56C H 0.0986 0.9977 0.2735 0.046 Uiso 1 1 calc R . . 
 
loop_ 
 _atom_site_aniso_label 
 _atom_site_aniso_U_11 
 _atom_site_aniso_U_22 
 _atom_site_aniso_U_33 
 _atom_site_aniso_U_23 
 _atom_site_aniso_U_13 
 _atom_site_aniso_U_12 
S1 0.0192(3) 0.0150(3) 0.0221(3) 0.0013(2) 0.0108(3) 0.0000(2) 
C2 0.0150(12) 0.0180(13) 0.0167(12) 0.0027(10) 0.0054(10) 0.0001(10) 
N3 0.0162(11) 0.0201(12) 0.0180(11) 0.0003(9) 0.0056(9) -0.0018(9) 
C4 0.0154(13) 0.0205(14) 0.0171(12) 0.0008(10) 0.0055(10) -0.0005(10) 
C5 0.0160(13) 0.0211(14) 0.0172(12) 0.0019(10) 0.0050(10) 0.0012(10) 
C6 0.0151(13) 0.0171(13) 0.0175(12) 0.0011(10) 0.0030(10) 0.0009(10) 
C7 0.0204(14) 0.0208(14) 0.0207(13) 0.0003(11) 0.0084(11) -0.0017(11) 
C8 0.0230(14) 0.0266(15) 0.0192(13) -0.0003(11) 0.0090(11) -0.0009(12) 
C9 0.0209(14) 0.0230(14) 0.0162(13) 0.0001(11) 0.0033(11) 0.0014(11) 
C10 0.0238(15) 0.0186(14) 0.0262(14) 0.0000(11) 0.0096(12) -0.0026(11) 
C11 0.0199(14) 0.0230(14) 0.0255(14) 0.0012(11) 0.0106(11) -0.0012(11) 
C12 0.0318(16) 0.0258(15) 0.0177(13) -0.0011(11) 0.0050(12) 0.0038(13) 
F1 0.0388(12) 0.0293(11) 0.0531(13) -0.0186(9) 0.0010(10) -0.0003(9) 
F2 0.0506(13) 0.0345(11) 0.0332(10) -0.0095(9) -0.0087(9) 0.0242(10) 
F3 0.098(2) 0.0324(12) 0.0565(14) -0.0068(10) 0.0568(14) 0.0046(12) 
C13 0.0182(13) 0.0229(14) 0.0234(14) -0.0015(11) 0.0088(11) -0.0031(11) 
F4 0.0487(13) 0.0376(11) 0.0587(13) -0.0224(10) 0.0421(11) -0.0252(10) 
F5 0.0247(9) 0.0333(10) 0.0201(8) -0.0029(7) 0.0095(7) 0.0015(7) 
F6 0.0228(9) 0.0503(12) 0.0313(10) 0.0042(9) 0.0124(7) 0.0147(8) 
C14 0.0175(13) 0.0173(13) 0.0186(13) 0.0022(10) 0.0054(10) 0.0005(10) 
O1 0.0350(12) 0.0185(10) 0.0277(11) -0.0006(8) 0.0181(9) 0.0019(9) 
O2 0.0225(10) 0.0148(9) 0.0244(10) -0.0017(8) 0.0124(8) -0.0013(8) 
C15 0.0228(14) 0.0158(13) 0.0229(13) -0.0013(11) 0.0081(11) -0.0022(11) 
C16 0.0307(16) 0.0203(14) 0.0233(14) 0.0024(11) 0.0083(12) 0.0044(12) 
S21 0.0206(3) 0.0140(3) 0.0180(3) -0.0005(2) 0.0096(2) -0.0011(2) 
C22 0.0155(12) 0.0161(13) 0.0154(12) -0.0021(10) 0.0039(10) 0.0005(10) 
N23 0.0167(11) 0.0188(11) 0.0178(11) 0.0009(9) 0.0069(9) -0.0010(9) 
C24 0.0144(12) 0.0185(13) 0.0178(12) 0.0012(10) 0.0051(10) -0.0008(10) 
C25 0.0141(12) 0.0190(13) 0.0174(12) 0.0001(10) 0.0061(10) -0.0025(10) 
C26 0.0137(12) 0.0173(13) 0.0161(12) 0.0001(10) 0.0037(10) -0.0005(10) 
C27 0.0213(13) 0.0177(13) 0.0197(13) -0.0011(10) 0.0095(11) 0.0005(11) 
C28 0.0203(14) 0.0210(14) 0.0218(13) 0.0000(11) 0.0101(11) -0.0009(11) 
C29 0.0151(12) 0.0194(13) 0.0172(12) 0.0017(10) 0.0020(10) -0.0021(10) 
C30 0.0212(14) 0.0138(13) 0.0253(14) -0.0019(11) 0.0082(11) 0.0015(11) 
C31 0.0208(14) 0.0196(14) 0.0222(13) -0.0005(11) 0.0104(11) 0.0002(11) 
C32 0.0287(16) 0.0191(14) 0.0229(14) 0.0017(11) 0.0070(12) -0.0033(12) 
F21 0.0609(14) 0.0301(10) 0.0265(9) 0.0004(8) 0.0204(9) -0.0166(9) 
F22 0.0704(16) 0.0493(14) 0.0280(10) 0.0019(9) 0.0012(10) -0.0431(12) 
F23 0.0618(16) 0.0282(11) 0.097(2) 0.0303(12) 0.0451(15) 0.0150(11) 
C33 0.0185(13) 0.0202(14) 0.0185(13) 0.0010(11) 0.0076(10) -0.0018(11) 
F24 0.0332(10) 0.0207(8) 0.0297(9) -0.0002(7) 0.0200(7) 0.0032(7) 
F25 0.0224(8) 0.0289(9) 0.0173(8) 0.0034(7) 0.0074(6) 0.0009(7) 
F26 0.0184(8) 0.0293(9) 0.0256(8) 0.0024(7) 0.0096(7) -0.0046(7) 
C34 0.0151(12) 0.0177(13) 0.0198(13) -0.0001(10) 0.0055(10) -0.0012(10) 
O21 0.0315(11) 0.0198(10) 0.0254(10) 0.0030(8) 0.0150(9) -0.0024(8) 
O22 0.0246(10) 0.0164(9) 0.0224(10) -0.0012(8) 0.0099(8) -0.0032(8) 
C35 0.0265(15) 0.0170(14) 0.0276(15) -0.0049(11) 0.0101(12) -0.0065(11) 
C36 0.0312(16) 0.0198(14) 0.0310(16) -0.0003(12) 0.0134(13) -0.0002(12) 
S41 0.0193(3) 0.0163(3) 0.0191(3) 0.0001(2) 0.0101(3) 0.0005(2) 
C42 0.0164(12) 0.0187(13) 0.0151(12) -0.0024(10) 0.0062(10) 0.0009(10) 
N43 0.0162(11) 0.0202(11) 0.0161(10) -0.0004(9) 0.0067(9) -0.0016(9) 
C44 0.0147(13) 0.0209(13) 0.0143(12) -0.0014(10) 0.0047(10) -0.0024(10) 
C45 0.0142(12) 0.0207(14) 0.0168(12) 0.0000(10) 0.0054(10) -0.0019(10) 
C46 0.0158(12) 0.0197(13) 0.0146(12) 0.0002(10) 0.0055(10) -0.0027(10) 
C47 0.0247(15) 0.0204(14) 0.0253(14) -0.0005(11) 0.0149(12) 0.0010(11) 
C48 0.0233(15) 0.0255(15) 0.0245(14) -0.0004(12) 0.0142(12) -0.0007(12) 
C49 0.0153(13) 0.0236(14) 0.0161(12) 0.0008(10) 0.0050(10) -0.0025(11) 
C50 0.0206(14) 0.0185(14) 0.0218(13) -0.0007(11) 0.0068(11) 0.0010(11) 
C51 0.0160(13) 0.0217(14) 0.0220(13) 0.0023(11) 0.0091(10) 0.0018(11) 
C52 0.0171(13) 0.0247(15) 0.0260(14) 0.0035(12) 0.0065(11) -0.0033(11) 
F41 0.0151(9) 0.0552(13) 0.0523(12) 0.0275(10) 0.0056(8) -0.0065(8) 
F42 0.0332(10) 0.0357(10) 0.0235(9) 0.0085(8) 0.0082(7) -0.0081(8) 
F43 0.0597(14) 0.0242(10) 0.0572(13) -0.0075(9) 0.0378(11) -0.0145(9) 
C53 0.0185(13) 0.0220(14) 0.0190(13) -0.0006(11) 0.0088(11) -0.0011(11) 
F44 0.0345(10) 0.0202(8) 0.0366(10) -0.0020(7) 0.0256(8) 0.0008(7) 
F45 0.0275(9) 0.0321(10) 0.0192(8) 0.0044(7) 0.0123(7) 0.0008(7) 
F46 0.0167(8) 0.0351(10) 0.0319(9) -0.0047(8) 0.0115(7) -0.0078(7) 
C54 0.0213(14) 0.0177(13) 0.0165(12) -0.0011(10) 0.0053(10) -0.0011(11) 
O41 0.0322(12) 0.0224(11) 0.0299(11) 0.0036(8) 0.0190(9) -0.0016(9) 
O42 0.0248(10) 0.0160(10) 0.0294(10) 0.0011(8) 0.0133(8) -0.0009(8) 
C55 0.0211(14) 0.0166(13) 0.0285(15) 0.0010(11) 0.0091(11) -0.0013(11) 
C56 0.0280(17) 0.0211(15) 0.0471(19) -0.0016(14) 0.0168(14) 0.0014(12) 
 
_geom_special_details 
; 
 All esds (except the esd in the dihedral angle between two l.s. planes) 
 are estimated using the full covariance matrix.  The cell esds are taken 
 into account individually in the estimation of esds in distances, angles 
 and torsion angles; correlations between esds in cell parameters are only 
 used when they are defined by crystal symmetry.  An approximate (isotropic) 
 treatment of cell esds is used for estimating esds involving l.s. planes. 
;
loop_ 
 _geom_bond_atom_site_label_1 
 _geom_bond_atom_site_label_2 
 _geom_bond_distance 
 _geom_bond_site_symmetry_2 
 _geom_bond_publ_flag 
S1 C5 1.714(3) . ? 
S1 C2 1.721(3) . ? 
C2 N3 1.327(4) . ? 
C2 C6 1.466(4) . ? 
N3 C4 1.360(4) . ? 
C4 C5 1.371(4) . ? 
C4 C13 1.511(4) . ? 
C5 C14 1.485(4) . ? 
C6 C11 1.394(4) . ? 
C6 C7 1.396(4) . ? 
C7 C8 1.379(4) . ? 
C7 H7 0.9500 . ? 
C8 C9 1.385(4) . ? 
C8 H8 0.9500 . ? 
C9 C10 1.396(4) . ? 
C9 C12 1.499(4) . ? 
C10 C11 1.373(4) . ? 
C10 H10 0.9500 . ? 
C11 H11 0.9500 . ? 
C12 F2 1.323(4) . ? 
C12 F3 1.330(4) . ? 
C12 F1 1.341(4) . ? 
C13 F5 1.327(3) . ? 
C13 F6 1.331(3) . ? 
C13 F4 1.332(3) . ? 
C14 O1 1.199(4) . ? 
C14 O2 1.338(3) . ? 
O2 C15 1.460(3) . ? 
C15 C16 1.505(4) . ? 
C15 H15A 0.9900 . ? 
C15 H15B 0.9900 . ? 
C16 H16A 0.9800 . ? 
C16 H16B 0.9800 . ? 
C16 H16C 0.9800 . ? 
S21 C25 1.718(3) . ? 
S21 C22 1.720(3) . ? 
C22 N23 1.320(3) . ? 
C22 C26 1.470(4) . ? 
N23 C24 1.356(4) . ? 
C24 C25 1.367(4) . ? 
C24 C33 1.511(4) . ? 
C25 C34 1.483(4) . ? 
C26 C31 1.395(4) . ? 
C26 C27 1.398(4) . ? 
C27 C28 1.378(4) . ? 
C27 H27 0.9500 . ? 
C28 C29 1.382(4) . ? 
C28 H28 0.9500 . ? 
C29 C30 1.399(4) . ? 
C29 C32 1.494(4) . ? 
C30 C31 1.381(4) . ? 
C30 H30 0.9500 . ? 
C31 H31 0.9500 . ? 
C32 F22 1.320(4) . ? 
C32 F21 1.332(4) . ? 
C32 F23 1.336(4) . ? 
C33 F24 1.335(3) . ? 
C33 F26 1.336(3) . ? 
C33 F25 1.340(3) . ? 
C34 O21 1.202(3) . ? 
C34 O22 1.337(3) . ? 
O22 C35 1.457(3) . ? 
C35 C36 1.507(4) . ? 
C35 H35A 0.9900 . ? 
C35 H35B 0.9900 . ? 
C36 H36A 0.9800 . ? 
C36 H36B 0.9800 . ? 
C36 H36C 0.9800 . ? 
S41 C45 1.713(3) . ? 
S41 C42 1.724(3) . ? 
C42 N43 1.321(3) . ? 
C42 C46 1.466(4) . ? 
N43 C44 1.353(4) . ? 
C44 C45 1.371(4) . ? 
C44 C53 1.515(4) . ? 
C45 C54 1.482(4) . ? 
C46 C51 1.392(4) . ? 
C46 C47 1.402(4) . ? 
C47 C48 1.381(4) . ? 
C47 H47 0.9500 . ? 
C48 C49 1.383(4) . ? 
C48 H48 0.9500 . ? 
C49 C50 1.391(4) . ? 
C49 C52 1.499(4) . ? 
C50 C51 1.387(4) . ? 
C50 H50 0.9500 . ? 
C51 H51 0.9500 . ? 
C52 F41 1.335(3) . ? 
C52 F43 1.336(4) . ? 
C52 F42 1.342(3) . ? 
C53 F45 1.328(3) . ? 
C53 F44 1.331(3) . ? 
C53 F46 1.343(3) . ? 
C54 O41 1.203(4) . ? 
C54 O42 1.337(3) . ? 
O42 C55 1.452(3) . ? 
C55 C56 1.505(4) . ? 
C55 H55A 0.9900 . ? 
C55 H55B 0.9900 . ? 
C56 H56A 0.9800 . ? 
C56 H56B 0.9800 . ? 
C56 H56C 0.9800 . ? 
 
loop_ 
 _geom_angle_atom_site_label_1 
 _geom_angle_atom_site_label_2 
 _geom_angle_atom_site_label_3 
 _geom_angle 
 _geom_angle_site_symmetry_1 
 _geom_angle_site_symmetry_3 
 _geom_angle_publ_flag 
C5 S1 C2 89.56(13) . . ? 
N3 C2 C6 123.3(2) . . ? 
N3 C2 S1 114.5(2) . . ? 
C6 C2 S1 122.2(2) . . ? 
C2 N3 C4 110.4(2) . . ? 
N3 C4 C5 115.9(2) . . ? 
N3 C4 C13 118.0(2) . . ? 
C5 C4 C13 126.2(3) . . ? 
C4 C5 C14 128.5(3) . . ? 
C4 C5 S1 109.7(2) . . ? 
C14 C5 S1 121.7(2) . . ? 
C11 C6 C7 119.4(3) . . ? 
C11 C6 C2 119.6(2) . . ? 
C7 C6 C2 121.0(3) . . ? 
C8 C7 C6 120.2(3) . . ? 
C8 C7 H7 119.9 . . ? 
C6 C7 H7 119.9 . . ? 
C7 C8 C9 120.1(3) . . ? 
C7 C8 H8 119.9 . . ? 
C9 C8 H8 119.9 . . ? 
C8 C9 C10 119.9(3) . . ? 
C8 C9 C12 120.6(3) . . ? 
C10 C9 C12 119.5(3) . . ? 
C11 C10 C9 120.1(3) . . ? 
C11 C10 H10 120.0 . . ? 
C9 C10 H10 120.0 . . ? 
C10 C11 C6 120.3(3) . . ? 
C10 C11 H11 119.8 . . ? 
C6 C11 H11 119.8 . . ? 
F2 C12 F3 108.0(3) . . ? 
F2 C12 F1 105.7(3) . . ? 
F3 C12 F1 105.3(3) . . ? 
F2 C12 C9 112.9(2) . . ? 
F3 C12 C9 112.4(3) . . ? 
F1 C12 C9 112.1(3) . . ? 
F5 C13 F6 107.6(2) . . ? 
F5 C13 F4 106.8(2) . . ? 
F6 C13 F4 106.8(2) . . ? 
F5 C13 C4 112.5(2) . . ? 
F6 C13 C4 112.2(2) . . ? 
F4 C13 C4 110.7(2) . . ? 
O1 C14 O2 125.6(3) . . ? 
O1 C14 C5 124.1(3) . . ? 
O2 C14 C5 110.2(2) . . ? 
C14 O2 C15 115.7(2) . . ? 
O2 C15 C16 110.3(2) . . ? 
O2 C15 H15A 109.6 . . ? 
C16 C15 H15A 109.6 . . ? 
O2 C15 H15B 109.6 . . ? 
C16 C15 H15B 109.6 . . ? 
H15A C15 H15B 108.1 . . ? 
C15 C16 H16A 109.5 . . ? 
C15 C16 H16B 109.5 . . ? 
H16A C16 H16B 109.5 . . ? 
C15 C16 H16C 109.5 . . ? 
H16A C16 H16C 109.5 . . ? 
H16B C16 H16C 109.5 . . ? 
C25 S21 C22 89.35(13) . . ? 
N23 C22 C26 121.8(2) . . ? 
N23 C22 S21 114.9(2) . . ? 
C26 C22 S21 123.2(2) . . ? 
C22 N23 C24 109.9(2) . . ? 
N23 C24 C25 116.6(2) . . ? 
N23 C24 C33 117.0(2) . . ? 
C25 C24 C33 126.4(3) . . ? 
C24 C25 C34 128.6(2) . . ? 
C24 C25 S21 109.2(2) . . ? 
C34 C25 S21 122.0(2) . . ? 
C31 C26 C27 119.6(3) . . ? 
C31 C26 C22 118.4(2) . . ? 
C27 C26 C22 122.0(2) . . ? 
C28 C27 C26 119.9(3) . . ? 
C28 C27 H27 120.0 . . ? 
C26 C27 H27 120.0 . . ? 
C27 C28 C29 120.5(3) . . ? 
C27 C28 H28 119.7 . . ? 
C29 C28 H28 119.7 . . ? 
C28 C29 C30 119.9(3) . . ? 
C28 C29 C32 120.8(3) . . ? 
C30 C29 C32 119.3(3) . . ? 
C31 C30 C29 119.9(3) . . ? 
C31 C30 H30 120.1 . . ? 
C29 C30 H30 120.1 . . ? 
C30 C31 C26 120.1(3) . . ? 
C30 C31 H31 119.9 . . ? 
C26 C31 H31 119.9 . . ? 
F22 C32 F21 106.1(3) . . ? 
F22 C32 F23 108.4(3) . . ? 
F21 C32 F23 104.7(3) . . ? 
F22 C32 C29 113.0(2) . . ? 
F21 C32 C29 112.8(2) . . ? 
F23 C32 C29 111.3(3) . . ? 
F24 C33 F26 107.0(2) . . ? 
F24 C33 F25 106.8(2) . . ? 
F26 C33 F25 107.5(2) . . ? 
F24 C33 C24 111.1(2) . . ? 
F26 C33 C24 112.2(2) . . ? 
F25 C33 C24 112.0(2) . . ? 
O21 C34 O22 126.0(3) . . ? 
O21 C34 C25 124.1(3) . . ? 
O22 C34 C25 109.8(2) . . ? 
C34 O22 C35 116.1(2) . . ? 
O22 C35 C36 111.8(2) . . ? 
O22 C35 H35A 109.2 . . ? 
C36 C35 H35A 109.2 . . ? 
O22 C35 H35B 109.2 . . ? 
C36 C35 H35B 109.2 . . ? 
H35A C35 H35B 107.9 . . ? 
C35 C36 H36A 109.5 . . ? 
C35 C36 H36B 109.5 . . ? 
H36A C36 H36B 109.5 . . ? 
C35 C36 H36C 109.5 . . ? 
H36A C36 H36C 109.5 . . ? 
H36B C36 H36C 109.5 . . ? 
C45 S41 C42 89.46(13) . . ? 
N43 C42 C46 123.5(2) . . ? 
N43 C42 S41 114.6(2) . . ? 
C46 C42 S41 121.9(2) . . ? 
C42 N43 C44 110.3(2) . . ? 
N43 C44 C45 116.3(2) . . ? 
N43 C44 C53 117.9(2) . . ? 
C45 C44 C53 125.8(3) . . ? 
C44 C45 C54 129.0(2) . . ? 
C44 C45 S41 109.4(2) . . ? 
C54 C45 S41 121.6(2) . . ? 
C51 C46 C47 119.5(3) . . ? 
C51 C46 C42 119.4(2) . . ? 
C47 C46 C42 121.0(3) . . ? 
C48 C47 C46 120.2(3) . . ? 
C48 C47 H47 119.9 . . ? 
C46 C47 H47 119.9 . . ? 
C47 C48 C49 120.0(3) . . ? 
C47 C48 H48 120.0 . . ? 
C49 C48 H48 120.0 . . ? 
C48 C49 C50 120.4(3) . . ? 
C48 C49 C52 119.1(3) . . ? 
C50 C49 C52 120.5(3) . . ? 
C51 C50 C49 119.9(3) . . ? 
C51 C50 H50 120.1 . . ? 
C49 C50 H50 120.1 . . ? 
C50 C51 C46 120.0(3) . . ? 
C50 C51 H51 120.0 . . ? 
C46 C51 H51 120.0 . . ? 
F41 C52 F43 106.9(3) . . ? 
F41 C52 F42 105.5(2) . . ? 
F43 C52 F42 105.7(2) . . ? 
F41 C52 C49 112.6(2) . . ? 
F43 C52 C49 113.3(2) . . ? 
F42 C52 C49 112.3(2) . . ? 
F45 C53 F44 107.1(2) . . ? 
F45 C53 F46 107.9(2) . . ? 
F44 C53 F46 106.5(2) . . ? 
F45 C53 C44 112.9(2) . . ? 
F44 C53 C44 110.9(2) . . ? 
F46 C53 C44 111.3(2) . . ? 
O41 C54 O42 125.1(3) . . ? 
O41 C54 C45 124.3(3) . . ? 
O42 C54 C45 110.5(2) . . ? 
C54 O42 C55 114.9(2) . . ? 
O42 C55 C56 107.2(2) . . ? 
O42 C55 H55A 110.3 . . ? 
C56 C55 H55A 110.3 . . ? 
O42 C55 H55B 110.3 . . ? 
C56 C55 H55B 110.3 . . ? 
H55A C55 H55B 108.5 . . ? 
C55 C56 H56A 109.5 . . ? 
C55 C56 H56B 109.5 . . ? 
H56A C56 H56B 109.5 . . ? 
C55 C56 H56C 109.5 . . ? 
H56A C56 H56C 109.5 . . ? 
H56B C56 H56C 109.5 . . ? 
 
loop_ 
 _geom_torsion_atom_site_label_1 
 _geom_torsion_atom_site_label_2 
 _geom_torsion_atom_site_label_3 
 _geom_torsion_atom_site_label_4 
 _geom_torsion 
 _geom_torsion_site_symmetry_1 
 _geom_torsion_site_symmetry_2 
 _geom_torsion_site_symmetry_3 
 _geom_torsion_site_symmetry_4 
 _geom_torsion_publ_flag 
C5 S1 C2 N3 0.2(2) . . . . ? 
C5 S1 C2 C6 -179.4(2) . . . . ? 
C6 C2 N3 C4 179.4(2) . . . . ? 
S1 C2 N3 C4 -0.1(3) . . . . ? 
C2 N3 C4 C5 -0.1(3) . . . . ? 
C2 N3 C4 C13 179.4(2) . . . . ? 
N3 C4 C5 C14 178.5(3) . . . . ? 
C13 C4 C5 C14 -0.9(5) . . . . ? 
N3 C4 C5 S1 0.2(3) . . . . ? 
C13 C4 C5 S1 -179.2(2) . . . . ? 
C2 S1 C5 C4 -0.2(2) . . . . ? 
C2 S1 C5 C14 -178.6(2) . . . . ? 
N3 C2 C6 C11 -5.7(4) . . . . ? 
S1 C2 C6 C11 173.8(2) . . . . ? 
N3 C2 C6 C7 175.4(3) . . . . ? 
S1 C2 C6 C7 -5.1(4) . . . . ? 
C11 C6 C7 C8 -0.9(4) . . . . ? 
C2 C6 C7 C8 178.1(3) . . . . ? 
C6 C7 C8 C9 0.1(4) . . . . ? 
C7 C8 C9 C10 1.0(4) . . . . ? 
C7 C8 C9 C12 -178.0(3) . . . . ? 
C8 C9 C10 C11 -1.3(4) . . . . ? 
C12 C9 C10 C11 177.6(3) . . . . ? 
C9 C10 C11 C6 0.6(4) . . . . ? 
C7 C6 C11 C10 0.5(4) . . . . ? 
C2 C6 C11 C10 -178.5(3) . . . . ? 
C8 C9 C12 F2 105.7(3) . . . . ? 
C10 C9 C12 F2 -73.3(4) . . . . ? 
C8 C9 C12 F3 -16.7(4) . . . . ? 
C10 C9 C12 F3 164.3(3) . . . . ? 
C8 C9 C12 F1 -135.1(3) . . . . ? 
C10 C9 C12 F1 45.9(4) . . . . ? 
N3 C4 C13 F5 112.8(3) . . . . ? 
C5 C4 C13 F5 -67.9(4) . . . . ? 
N3 C4 C13 F6 -125.8(3) . . . . ? 
C5 C4 C13 F6 53.6(4) . . . . ? 
N3 C4 C13 F4 -6.6(4) . . . . ? 
C5 C4 C13 F4 172.8(3) . . . . ? 
C4 C5 C14 O1 12.2(5) . . . . ? 
S1 C5 C14 O1 -169.7(2) . . . . ? 
C4 C5 C14 O2 -169.3(3) . . . . ? 
S1 C5 C14 O2 8.8(3) . . . . ? 
O1 C14 O2 C15 -0.5(4) . . . . ? 
C5 C14 O2 C15 -179.0(2) . . . . ? 
C14 O2 C15 C16 -85.5(3) . . . . ? 
C25 S21 C22 N23 -0.2(2) . . . . ? 
C25 S21 C22 C26 -179.7(2) . . . . ? 
C26 C22 N23 C24 179.7(2) . . . . ? 
S21 C22 N23 C24 0.1(3) . . . . ? 
C22 N23 C24 C25 0.0(3) . . . . ? 
C22 N23 C24 C33 -179.0(2) . . . . ? 
N23 C24 C25 C34 -175.9(3) . . . . ? 
C33 C24 C25 C34 3.0(5) . . . . ? 
N23 C24 C25 S21 -0.1(3) . . . . ? 
C33 C24 C25 S21 178.8(2) . . . . ? 
C22 S21 C25 C24 0.1(2) . . . . ? 
C22 S21 C25 C34 176.3(2) . . . . ? 
N23 C22 C26 C31 -5.4(4) . . . . ? 
S21 C22 C26 C31 174.1(2) . . . . ? 
N23 C22 C26 C27 174.4(3) . . . . ? 
S21 C22 C26 C27 -6.1(4) . . . . ? 
C31 C26 C27 C28 0.6(4) . . . . ? 
C22 C26 C27 C28 -179.2(3) . . . . ? 
C26 C27 C28 C29 -0.4(4) . . . . ? 
C27 C28 C29 C30 -0.2(4) . . . . ? 
C27 C28 C29 C32 -180.0(3) . . . . ? 
C28 C29 C30 C31 0.6(4) . . . . ? 
C32 C29 C30 C31 -179.6(3) . . . . ? 
C29 C30 C31 C26 -0.5(4) . . . . ? 
C27 C26 C31 C30 -0.1(4) . . . . ? 
C22 C26 C31 C30 179.7(3) . . . . ? 
C28 C29 C32 F22 -101.9(3) . . . . ? 
C30 C29 C32 F22 78.3(4) . . . . ? 
C28 C29 C32 F21 18.5(4) . . . . ? 
C30 C29 C32 F21 -161.3(3) . . . . ? 
C28 C29 C32 F23 135.9(3) . . . . ? 
C30 C29 C32 F23 -43.9(4) . . . . ? 
N23 C24 C33 F24 6.6(3) . . . . ? 
C25 C24 C33 F24 -172.3(3) . . . . ? 
N23 C24 C33 F26 126.3(3) . . . . ? 
C25 C24 C33 F26 -52.6(4) . . . . ? 
N23 C24 C33 F25 -112.8(3) . . . . ? 
C25 C24 C33 F25 68.3(4) . . . . ? 
C24 C25 C34 O21 -20.1(5) . . . . ? 
S21 C25 C34 O21 164.6(2) . . . . ? 
C24 C25 C34 O22 158.3(3) . . . . ? 
S21 C25 C34 O22 -17.0(3) . . . . ? 
O21 C34 O22 C35 3.5(4) . . . . ? 
C25 C34 O22 C35 -174.8(2) . . . . ? 
C34 O22 C35 C36 -83.0(3) . . . . ? 
C45 S41 C42 N43 0.0(2) . . . . ? 
C45 S41 C42 C46 -177.9(2) . . . . ? 
C46 C42 N43 C44 178.0(2) . . . . ? 
S41 C42 N43 C44 0.0(3) . . . . ? 
C42 N43 C44 C45 -0.1(3) . . . . ? 
C42 N43 C44 C53 179.9(2) . . . . ? 
N43 C44 C45 C54 -179.5(3) . . . . ? 
C53 C44 C45 C54 0.6(5) . . . . ? 
N43 C44 C45 S41 0.1(3) . . . . ? 
C53 C44 C45 S41 -179.8(2) . . . . ? 
C42 S41 C45 C44 -0.1(2) . . . . ? 
C42 S41 C45 C54 179.5(2) . . . . ? 
N43 C42 C46 C51 0.2(4) . . . . ? 
S41 C42 C46 C51 178.0(2) . . . . ? 
N43 C42 C46 C47 -177.5(3) . . . . ? 
S41 C42 C46 C47 0.3(4) . . . . ? 
C51 C46 C47 C48 -1.6(4) . . . . ? 
C42 C46 C47 C48 176.1(3) . . . . ? 
C46 C47 C48 C49 0.3(4) . . . . ? 
C47 C48 C49 C50 1.0(4) . . . . ? 
C47 C48 C49 C52 -180.0(3) . . . . ? 
C48 C49 C50 C51 -0.9(4) . . . . ? 
C52 C49 C50 C51 -180.0(3) . . . . ? 
C49 C50 C51 C46 -0.4(4) . . . . ? 
C47 C46 C51 C50 1.6(4) . . . . ? 
C42 C46 C51 C50 -176.1(3) . . . . ? 
C48 C49 C52 F41 50.7(4) . . . . ? 
C50 C49 C52 F41 -130.2(3) . . . . ? 
C48 C49 C52 F43 172.2(3) . . . . ? 
C50 C49 C52 F43 -8.7(4) . . . . ? 
C48 C49 C52 F42 -68.2(3) . . . . ? 
C50 C49 C52 F42 110.9(3) . . . . ? 
N43 C44 C53 F45 124.7(3) . . . . ? 
C45 C44 C53 F45 -55.3(4) . . . . ? 
N43 C44 C53 F44 4.5(3) . . . . ? 
C45 C44 C53 F44 -175.5(2) . . . . ? 
N43 C44 C53 F46 -113.9(3) . . . . ? 
C45 C44 C53 F46 66.1(3) . . . . ? 
C44 C45 C54 O41 -4.1(5) . . . . ? 
S41 C45 C54 O41 176.3(2) . . . . ? 
C44 C45 C54 O42 174.9(3) . . . . ? 
S41 C45 C54 O42 -4.7(3) . . . . ? 
O41 C54 O42 C55 -1.1(4) . . . . ? 
C45 C54 O42 C55 180.0(2) . . . . ? 
C54 O42 C55 C56 180.0(2) . . . . ? 

_diffrn_measured_fraction_theta_max    0.953 
_diffrn_reflns_theta_full              67.50 
_diffrn_measured_fraction_theta_full   0.991 
_refine_diff_density_max    1.051
_refine_diff_density_min   -0.605 
_refine_diff_density_rms    0.080 
