# Supplementary material
Source: publisher figshare collection journal article supplement (https://acs.figshare.com/ndownloader/files/4196539)
Supplement: Supplementary file 4 [file 4196539 › jo202201w_si_002/Cpd 8.cif]

data_MHCJME

_nottingham_internal_coll_name         MHCJME
_nottingham_internal_coll_number       10329 
_nottingham_internal_coll_client       MH/CJM 
_nottingham_internal_coll_type         custom 
_nottingham_internal_coll_frame_time   '3 and 6' 
_nottingham_internal_coll_frame_width  '2' 
_nottingham_internal_coll_frame_method '\w scans' 
_nottingham_internal_coll_user         WL 
_nottingham_internal_coll_date         7/4/2011 
_nottingham_internal_process_user      WL 
_nottingham_internal_process_date      07/04/2011 
_nottingham_internal_solution_user     WL 
_nottingham_internal_solution_date     7/4/2011 
_nottingham_internal_refinement_user   WL 
_nottingham_internal_refinement_date   8/4/2011 
_nottingham_internal_validation_user   WL 
_nottingham_internal_validation_date   8/4/2011 
_nottingham_internal_archive_date      8/4/2011 

_refine_special_details 
; 
 Refinement of F^2^ against ALL reflections.  The weighted R-factor wR and 
 goodness of fit S are based on F^2^, conventional R-factors R are based 
 on F, with F set to zero for negative F^2^. The threshold expression of 
 F^2^ > 2sigma(F^2^) is used only for calculating R-factors(gt) etc. and is 
 not relevant to the choice of reflections for refinement.  R-factors based 
 on F^2^ are statistically about twice as large as those based on F, and R- 
 factors based on ALL data will be even larger. 
; 
 
_audit_creation_method            'enCIFer editing of SHELXL-97 created file' 
_chemical_name_systematic         
; 
 ? 
; 
_chemical_name_common             ? 
_chemical_melting_point           ? 
_chemical_formula_moiety          ?  
_chemical_formula_sum             
'C13 H12 F3 N O3 S' 
_chemical_formula_weight          319.30 
 
loop_ 
 _atom_type_symbol 
 _atom_type_description 
 _atom_type_scat_dispersion_real 
 _atom_type_scat_dispersion_imag 
 _atom_type_scat_source 
 'C'  'C'   0.0181   0.0091 
 'International Tables Vol C Tables 4.2.6.8 and 6.1.1.4' 
 'H'  'H'   0.0000   0.0000 
 'International Tables Vol C Tables 4.2.6.8 and 6.1.1.4' 
 'N'  'N'   0.0311   0.0180 
 'International Tables Vol C Tables 4.2.6.8 and 6.1.1.4' 
 'O'  'O'   0.0492   0.0322 
 'International Tables Vol C Tables 4.2.6.8 and 6.1.1.4' 
 'F'  'F'   0.0727   0.0534 
 'International Tables Vol C Tables 4.2.6.8 and 6.1.1.4' 
 'S'  'S'   0.3331   0.5567 
 'International Tables Vol C Tables 4.2.6.8 and 6.1.1.4'  
 
_symmetry_cell_setting            monoclinic 
_symmetry_space_group_name_H-M    'P 21/c' 
_symmetry_space_group_name_Hall   '-P 2ybc' 
 
loop_ 
 _symmetry_equiv_pos_as_xyz 
 'x, y, z' 
 '-x, y+1/2, -z+1/2' 
 '-x, -y, -z' 
 'x, -y-1/2, z-1/2'  
 
_cell_length_a                    12.1098(13) 
_cell_length_b                    5.6685(5) 
_cell_length_c                    20.055(2) 
_cell_angle_alpha                 90.00 
_cell_angle_beta                  99.927(11) 
_cell_angle_gamma                 90.00 
_cell_volume                      1356.1(3) 
_cell_formula_units_Z             4 
_cell_measurement_temperature     90(2) 
_cell_measurement_reflns_used     3353 
_cell_measurement_theta_min       3.7 
_cell_measurement_theta_max       74.66 

_exptl_crystal_description        rod 
_exptl_crystal_colour             colourless 
_exptl_crystal_size_max           0.6341 
_exptl_crystal_size_mid           0.1001 
_exptl_crystal_size_min           0.0869 
_exptl_crystal_density_meas       ? 
_exptl_crystal_density_diffrn     1.564 
_exptl_crystal_density_method     ? 
_exptl_crystal_F_000              656 
_exptl_absorpt_coefficient_mu     2.574 
_exptl_absorpt_correction_T_min   0.553 
_exptl_absorpt_correction_T_max   1.263 
_exptl_absorpt_correction_type    'gaussian' 
_exptl_absorpt_process_details    
;
CrysAlisPro, Oxford Diffraction Ltd., 
Version 1.171.34.36 (release 02-08-2010 CrysAlis171 .NET) 
(compiled Jan  5 2010,16:28:46) 
Analytical numeric absorption correction using a multifaceted crystal 
model based on expressions derived by R.C. Clark & J.S. Reid. 
(Clark, R. C. & Reid, J. S. (1995). Acta Cryst. A51, 887-897) 
; 

_diffrn_ambient_temperature       90(2)
_diffrn_radiation_wavelength      1.5418
_diffrn_radiation_type            'Cu K\a'
_diffrn_radiation_source          'SuperNova (Cu) X-ray Source'
_diffrn_radiation_monochromator   'mirror'
_diffrn_measurement_device_type   'SuperNova, Single source at offset), Atlas'
_diffrn_measurement_method        '\w scans'
_diffrn_detector_area_resol_mean  10.3613
_diffrn_standards_number          0
_diffrn_standards_interval_count  .
_diffrn_standards_decay_%         0
_diffrn_reflns_number             10201 
_diffrn_reflns_av_R_equivalents   0.0317 
_diffrn_reflns_av_sigmaI/netI     0.0249 
_diffrn_reflns_limit_h_min        -15 
_diffrn_reflns_limit_h_max        15 
_diffrn_reflns_limit_k_min        -6 
_diffrn_reflns_limit_k_max        6 
_diffrn_reflns_limit_l_min        -24 
_diffrn_reflns_limit_l_max        22 
_diffrn_reflns_theta_min          3.71 
_diffrn_reflns_theta_max          74.84 
_reflns_number_total              2707 
_reflns_number_gt                 2426 
_reflns_threshold_expression      I>2\s(I) 
 
_computing_data_collection       
;
CrysAlisPro, Oxford Diffraction Ltd.,
Version 1.171.34.36 (release 02-08-2010 CrysAlis171 .NET)
(compiled Nov  6 2009,16:24:50)
; 
_computing_cell_refinement       
;
CrysAlisPro, Oxford Diffraction Ltd.,
Version 1.171.34.36 (release 02-08-2010 CrysAlis171 .NET)
(compiled Nov  6 2009,16:24:50)
; 
_computing_data_reduction        
;
CrysAlisPro, Oxford Diffraction Ltd.,
Version 1.171.34.36 (release 02-08-2010 CrysAlis171 .NET)
(compiled Nov  6 2009,16:24:50)
; 
_computing_structure_solution    'smtbx-flip (Bourhis, 2008)' 
_computing_structure_refinement  'SHELXL97 (Sheldrick, 2008)' 
_computing_molecular_graphics    ' ? ' 
_computing_publication_material  'enCIFer(Allen et al.,2004);PLATON(Spek,2003)' 

_refine_ls_structure_factor_coef  Fsqd  
_refine_ls_matrix_type            full 
_refine_ls_weighting_scheme       calc  
_refine_ls_weighting_details      
'calc w=1/[\s^2^(Fo^2^)+(0.0338P)^2^+1.2244P] where P=(Fo^2^+2Fc^2^)/3'
_atom_sites_solution_primary      other 
_atom_sites_solution_secondary    difmap 
_atom_sites_solution_hydrogens    geom
_refine_ls_hydrogen_treatment     constr
_refine_ls_extinction_method      none 
_refine_ls_extinction_coef        ?  
_refine_ls_number_reflns          2707 
_refine_ls_number_parameters      192 
_refine_ls_number_restraints      0 
_refine_ls_R_factor_all           0.0376 
_refine_ls_R_factor_gt            0.0322 
_refine_ls_wR_factor_ref          0.0843 
_refine_ls_wR_factor_gt           0.0803 
_refine_ls_goodness_of_fit_ref    1.051 
_refine_ls_restrained_S_all       1.051 
_refine_ls_shift/su_max           0.001 
_refine_ls_shift/su_mean          0.000 
 
loop_ 
 _atom_site_label 
 _atom_site_type_symbol 
 _atom_site_fract_x 
 _atom_site_fract_y 
 _atom_site_fract_z 
 _atom_site_U_iso_or_equiv 
 _atom_site_adp_type 
 _atom_site_occupancy 
 _atom_site_symmetry_multiplicity 
 _atom_site_calc_flag 
 _atom_site_refinement_flags 
 _atom_site_disorder_assembly 
 _atom_site_disorder_group 
S1 S 0.29746(4) 0.52841(7) 0.74100(2) 0.01758(12) Uani 1 1 d . . . 
C2 C 0.22471(14) 0.7988(3) 0.74053(8) 0.0147(3) Uani 1 1 d . . . 
N3 N 0.23140(12) 0.9480(3) 0.69373(7) 0.0152(3) Uani 1 1 d . . . 
C4 C 0.30753(14) 0.8729(3) 0.64911(8) 0.0141(3) Uani 1 1 d . . . 
C5 C 0.33246(14) 0.6001(3) 0.65933(8) 0.0146(3) Uani 1 1 d . . . 
H5 H 0.2821 0.5099 0.6235 0.017 Uiso 1 1 calc R . . 
C6 C 0.15579(14) 0.8394(3) 0.79356(8) 0.0149(3) Uani 1 1 d . . . 
C7 C 0.09481(14) 1.0484(3) 0.79338(8) 0.0162(3) Uani 1 1 d . . . 
H7 H 0.0985 1.1646 0.7597 0.019 Uiso 1 1 calc R . . 
C8 C 0.02865(14) 1.0862(3) 0.84261(9) 0.0185(4) Uani 1 1 d . . . 
H8 H -0.0125 1.2288 0.8426 0.022 Uiso 1 1 calc R . . 
C9 C 0.02244(15) 0.9161(3) 0.89183(9) 0.0201(4) Uani 1 1 d . . . 
H9 H -0.0228 0.9430 0.9253 0.024 Uiso 1 1 calc R . . 
C10 C 0.08233(15) 0.7073(3) 0.89205(9) 0.0197(4) Uani 1 1 d . . . 
H10 H 0.0777 0.5906 0.9255 0.024 Uiso 1 1 calc R . . 
C11 C 0.14907(14) 0.6694(3) 0.84316(8) 0.0167(3) Uani 1 1 d . . . 
H11 H 0.1904 0.5268 0.8435 0.020 Uiso 1 1 calc R . . 
C12 C 0.24780(14) 0.9202(3) 0.57621(8) 0.0159(3) Uani 1 1 d . . . 
F1 F 0.15184(9) 0.7977(2) 0.56221(5) 0.0226(2) Uani 1 1 d . . . 
F2 F 0.31077(9) 0.85768(19) 0.53042(5) 0.0214(2) Uani 1 1 d . . . 
F3 F 0.22175(9) 1.14712(18) 0.56561(5) 0.0209(2) Uani 1 1 d . . . 
O1 O 0.40426(10) 1.0111(2) 0.65748(6) 0.0155(3) Uani 1 1 d . . . 
H1 H 0.4329 1.0161 0.6987 0.023 Uiso 1 1 calc R . . 
C13 C 0.45373(14) 0.5402(3) 0.65598(8) 0.0145(3) Uani 1 1 d . . . 
O2 O 0.52895(10) 0.5309(2) 0.70423(6) 0.0185(3) Uani 1 1 d . . . 
O3 O 0.46543(10) 0.4980(2) 0.59256(6) 0.0156(3) Uani 1 1 d . . . 
C14 C 0.57840(15) 0.4335(3) 0.58197(9) 0.0199(4) Uani 1 1 d . . . 
H14A H 0.5733 0.3429 0.5393 0.024 Uiso 1 1 calc R . . 
H14B H 0.6144 0.3317 0.6196 0.024 Uiso 1 1 calc R . . 
C15 C 0.64899(16) 0.6503(4) 0.57838(10) 0.0274(4) Uani 1 1 d . . . 
H15A H 0.6127 0.7524 0.5416 0.041 Uiso 1 1 calc R . . 
H15B H 0.7232 0.6036 0.5698 0.041 Uiso 1 1 calc R . . 
H15C H 0.6570 0.7360 0.6214 0.041 Uiso 1 1 calc R . . 
 
loop_ 
 _atom_site_aniso_label 
 _atom_site_aniso_U_11 
 _atom_site_aniso_U_22 
 _atom_site_aniso_U_33 
 _atom_site_aniso_U_23 
 _atom_site_aniso_U_13 
 _atom_site_aniso_U_12 
S1 0.0228(2) 0.0128(2) 0.0198(2) 0.00294(15) 0.01128(16) 0.00312(15) 
C2 0.0147(8) 0.0133(8) 0.0158(8) -0.0005(6) 0.0020(6) 0.0000(6) 
N3 0.0160(7) 0.0150(7) 0.0153(7) -0.0011(5) 0.0045(5) -0.0001(5) 
C4 0.0156(8) 0.0119(8) 0.0156(8) -0.0014(6) 0.0049(6) -0.0004(6) 
C5 0.0176(8) 0.0126(8) 0.0142(7) 0.0013(6) 0.0045(6) 0.0000(6) 
C6 0.0135(8) 0.0162(8) 0.0151(7) -0.0026(6) 0.0027(6) -0.0031(6) 
C7 0.0158(8) 0.0163(8) 0.0165(8) -0.0004(6) 0.0030(6) -0.0008(6) 
C8 0.0164(8) 0.0186(9) 0.0205(8) -0.0028(7) 0.0032(7) 0.0016(7) 
C9 0.0181(9) 0.0248(9) 0.0188(8) -0.0030(7) 0.0077(7) -0.0011(7) 
C10 0.0221(9) 0.0203(9) 0.0177(8) 0.0010(7) 0.0067(7) -0.0024(7) 
C11 0.0180(8) 0.0155(8) 0.0172(8) -0.0015(6) 0.0045(6) 0.0003(6) 
C12 0.0186(8) 0.0144(8) 0.0158(8) -0.0001(6) 0.0062(6) 0.0003(6) 
F1 0.0203(5) 0.0264(6) 0.0197(5) 0.0021(4) -0.0009(4) -0.0062(4) 
F2 0.0266(6) 0.0248(6) 0.0145(5) 0.0002(4) 0.0083(4) 0.0049(4) 
F3 0.0278(6) 0.0152(5) 0.0194(5) 0.0024(4) 0.0029(4) 0.0045(4) 
O1 0.0170(6) 0.0153(6) 0.0140(6) 0.0002(4) 0.0020(4) -0.0038(5) 
C13 0.0196(8) 0.0093(8) 0.0160(8) 0.0007(6) 0.0068(6) -0.0014(6) 
O2 0.0187(6) 0.0220(6) 0.0150(6) 0.0003(5) 0.0033(5) 0.0023(5) 
O3 0.0156(6) 0.0177(6) 0.0146(6) -0.0003(4) 0.0054(4) 0.0023(5) 
C14 0.0166(9) 0.0254(9) 0.0190(8) -0.0016(7) 0.0065(7) 0.0044(7) 
C15 0.0200(10) 0.0361(11) 0.0271(10) 0.0017(8) 0.0073(7) -0.0033(8) 
 
_geom_special_details 
; 
 All esds (except the esd in the dihedral angle between two l.s. planes) 
 are estimated using the full covariance matrix.  The cell esds are taken 
 into account individually in the estimation of esds in distances, angles 
 and torsion angles; correlations between esds in cell parameters are only 
 used when they are defined by crystal symmetry.  An approximate (isotropic) 
 treatment of cell esds is used for estimating esds involving l.s. planes. 
;
loop_ 
 _geom_bond_atom_site_label_1 
 _geom_bond_atom_site_label_2 
 _geom_bond_distance 
 _geom_bond_site_symmetry_2 
 _geom_bond_publ_flag 
S1 C2 1.7673(17) . ? 
S1 C5 1.8075(16) . ? 
C2 N3 1.276(2) . ? 
C2 C6 1.479(2) . ? 
N3 C4 1.455(2) . ? 
C4 O1 1.395(2) . ? 
C4 C12 1.539(2) . ? 
C4 C5 1.582(2) . ? 
C5 C13 1.520(2) . ? 
C5 H5 1.0000 . ? 
C6 C7 1.396(2) . ? 
C6 C11 1.397(2) . ? 
C7 C8 1.391(2) . ? 
C7 H7 0.9500 . ? 
C8 C9 1.391(3) . ? 
C8 H8 0.9500 . ? 
C9 C10 1.388(3) . ? 
C9 H9 0.9500 . ? 
C10 C11 1.391(2) . ? 
C10 H10 0.9500 . ? 
C11 H11 0.9500 . ? 
C12 F3 1.333(2) . ? 
C12 F2 1.3386(19) . ? 
C12 F1 1.341(2) . ? 
O1 H1 0.8400 . ? 
C13 O2 1.210(2) . ? 
C13 O3 1.326(2) . ? 
O3 C14 1.466(2) . ? 
C14 C15 1.506(3) . ? 
C14 H14A 0.9900 . ? 
C14 H14B 0.9900 . ? 
C15 H15A 0.9800 . ? 
C15 H15B 0.9800 . ? 
C15 H15C 0.9800 . ? 
 
loop_ 
 _geom_angle_atom_site_label_1 
 _geom_angle_atom_site_label_2 
 _geom_angle_atom_site_label_3 
 _geom_angle 
 _geom_angle_site_symmetry_1 
 _geom_angle_site_symmetry_3 
 _geom_angle_publ_flag 
C2 S1 C5 89.69(8) . . ? 
N3 C2 C6 122.77(15) . . ? 
N3 C2 S1 118.93(13) . . ? 
C6 C2 S1 118.28(12) . . ? 
C2 N3 C4 112.69(14) . . ? 
O1 C4 N3 111.68(13) . . ? 
O1 C4 C12 105.29(13) . . ? 
N3 C4 C12 106.83(13) . . ? 
O1 C4 C5 113.32(13) . . ? 
N3 C4 C5 109.48(13) . . ? 
C12 C4 C5 109.97(13) . . ? 
C13 C5 C4 112.15(13) . . ? 
C13 C5 S1 111.65(11) . . ? 
C4 C5 S1 105.54(11) . . ? 
C13 C5 H5 109.1 . . ? 
C4 C5 H5 109.1 . . ? 
S1 C5 H5 109.1 . . ? 
C7 C6 C11 119.44(15) . . ? 
C7 C6 C2 119.61(15) . . ? 
C11 C6 C2 120.94(15) . . ? 
C8 C7 C6 119.87(16) . . ? 
C8 C7 H7 120.1 . . ? 
C6 C7 H7 120.1 . . ? 
C9 C8 C7 120.35(17) . . ? 
C9 C8 H8 119.8 . . ? 
C7 C8 H8 119.8 . . ? 
C10 C9 C8 120.08(16) . . ? 
C10 C9 H9 120.0 . . ? 
C8 C9 H9 120.0 . . ? 
C9 C10 C11 119.76(16) . . ? 
C9 C10 H10 120.1 . . ? 
C11 C10 H10 120.1 . . ? 
C10 C11 C6 120.50(16) . . ? 
C10 C11 H11 119.7 . . ? 
C6 C11 H11 119.7 . . ? 
F3 C12 F2 107.06(13) . . ? 
F3 C12 F1 107.08(14) . . ? 
F2 C12 F1 107.14(13) . . ? 
F3 C12 C4 112.30(14) . . ? 
F2 C12 C4 112.06(14) . . ? 
F1 C12 C4 110.91(13) . . ? 
C4 O1 H1 109.5 . . ? 
O2 C13 O3 124.68(16) . . ? 
O2 C13 C5 125.04(15) . . ? 
O3 C13 C5 110.27(14) . . ? 
C13 O3 C14 116.14(13) . . ? 
O3 C14 C15 110.79(15) . . ? 
O3 C14 H14A 109.5 . . ? 
C15 C14 H14A 109.5 . . ? 
O3 C14 H14B 109.5 . . ? 
C15 C14 H14B 109.5 . . ? 
H14A C14 H14B 108.1 . . ? 
C14 C15 H15A 109.5 . . ? 
C14 C15 H15B 109.5 . . ? 
H15A C15 H15B 109.5 . . ? 
C14 C15 H15C 109.5 . . ? 
H15A C15 H15C 109.5 . . ? 
H15B C15 H15C 109.5 . . ? 
 
loop_ 
 _geom_torsion_atom_site_label_1 
 _geom_torsion_atom_site_label_2 
 _geom_torsion_atom_site_label_3 
 _geom_torsion_atom_site_label_4 
 _geom_torsion 
 _geom_torsion_site_symmetry_1 
 _geom_torsion_site_symmetry_2 
 _geom_torsion_site_symmetry_3 
 _geom_torsion_site_symmetry_4 
 _geom_torsion_publ_flag 
C5 S1 C2 N3 -7.63(15) . . . . ? 
C5 S1 C2 C6 170.63(14) . . . . ? 
C6 C2 N3 C4 177.80(15) . . . . ? 
S1 C2 N3 C4 -4.02(19) . . . . ? 
C2 N3 C4 O1 -110.45(16) . . . . ? 
C2 N3 C4 C12 134.92(15) . . . . ? 
C2 N3 C4 C5 15.88(19) . . . . ? 
O1 C4 C5 C13 -16.42(19) . . . . ? 
N3 C4 C5 C13 -141.81(14) . . . . ? 
C12 C4 C5 C13 101.11(16) . . . . ? 
O1 C4 C5 S1 105.37(13) . . . . ? 
N3 C4 C5 S1 -20.03(16) . . . . ? 
C12 C4 C5 S1 -137.11(12) . . . . ? 
C2 S1 C5 C13 137.04(12) . . . . ? 
C2 S1 C5 C4 14.93(12) . . . . ? 
N3 C2 C6 C7 0.0(3) . . . . ? 
S1 C2 C6 C7 -178.18(13) . . . . ? 
N3 C2 C6 C11 178.75(16) . . . . ? 
S1 C2 C6 C11 0.6(2) . . . . ? 
C11 C6 C7 C8 0.4(2) . . . . ? 
C2 C6 C7 C8 179.14(16) . . . . ? 
C6 C7 C8 C9 -0.4(3) . . . . ? 
C7 C8 C9 C10 -0.1(3) . . . . ? 
C8 C9 C10 C11 0.4(3) . . . . ? 
C9 C10 C11 C6 -0.4(3) . . . . ? 
C7 C6 C11 C10 0.0(3) . . . . ? 
C2 C6 C11 C10 -178.76(16) . . . . ? 
O1 C4 C12 F3 -59.57(17) . . . . ? 
N3 C4 C12 F3 59.31(17) . . . . ? 
C5 C4 C12 F3 178.03(13) . . . . ? 
O1 C4 C12 F2 60.99(17) . . . . ? 
N3 C4 C12 F2 179.86(13) . . . . ? 
C5 C4 C12 F2 -61.42(17) . . . . ? 
O1 C4 C12 F1 -179.33(13) . . . . ? 
N3 C4 C12 F1 -60.45(17) . . . . ? 
C5 C4 C12 F1 58.27(17) . . . . ? 
C4 C5 C13 O2 92.29(19) . . . . ? 
S1 C5 C13 O2 -25.9(2) . . . . ? 
C4 C5 C13 O3 -88.07(16) . . . . ? 
S1 C5 C13 O3 153.71(11) . . . . ? 
O2 C13 O3 C14 0.7(2) . . . . ? 
C5 C13 O3 C14 -178.97(13) . . . . ? 
C13 O3 C14 C15 -83.01(18) . . . . ? 

loop_ 
 _geom_hbond_atom_site_label_D 
 _geom_hbond_atom_site_label_H 
 _geom_hbond_atom_site_label_A 
 _geom_hbond_distance_DH 
 _geom_hbond_distance_HA 
 _geom_hbond_distance_DA 
 _geom_hbond_angle_DHA 
 _geom_hbond_site_symmetry_A
O1 H1 O2  0.84 1.92 2.7543(17) 169.6 2_656 

_diffrn_measured_fraction_theta_max    0.974 
_diffrn_reflns_theta_full              67.50 
_diffrn_measured_fraction_theta_full   0.999 
_refine_diff_density_max    0.374
_refine_diff_density_min   -0.335 
_refine_diff_density_rms    0.057 
