# Supplementary material
Source: publisher figshare collection journal article supplement (https://acs.figshare.com/ndownloader/files/4196539)
Supplement: Supplementary file 4 [file 4196539 › jo202201w_si_002/Cpd 10a.cif]

data_MHCJMF

_nottingham_internal_coll_name         MHCJMF
_nottingham_internal_coll_number       10330 
_nottingham_internal_coll_client       MH/CJM 
_nottingham_internal_coll_type         custom 
_nottingham_internal_coll_frame_time   '3' 
_nottingham_internal_coll_frame_width  '2' 
_nottingham_internal_coll_frame_method '\w scans' 
_nottingham_internal_coll_user         WL 
_nottingham_internal_coll_date         6/4/2011 
_nottingham_internal_process_user      WL 
_nottingham_internal_process_date      06/04/2011 
_nottingham_internal_solution_user     WL
_nottingham_internal_solution_date     6/4/2011
_nottingham_internal_refinement_user   WL
_nottingham_internal_refinement_date   6/4/2011
_nottingham_internal_validation_user   WL
_nottingham_internal_validation_date   8/4/2011
_nottingham_internal_archive_date      8/4/2011

_refine_special_details 
; 
 Refinement of F^2^ against ALL reflections.  The weighted R-factor wR and 
 goodness of fit S are based on F^2^, conventional R-factors R are based 
 on F, with F set to zero for negative F^2^. The threshold expression of 
 F^2^ > 2sigma(F^2^) is used only for calculating R-factors(gt) etc. and is 
 not relevant to the choice of reflections for refinement.  R-factors based 
 on F^2^ are statistically about twice as large as those based on F, and R- 
 factors based on ALL data will be even larger. 
; 
 
_audit_creation_method            'enCIFer editing of SHELXL-97 created file' 
_chemical_name_systematic         
; 
 ? 
; 
_chemical_name_common             ? 
_chemical_melting_point           ? 
_chemical_formula_moiety          'C13 H10 F3 N3 O2'
_chemical_formula_sum             
'C13 H10 F3 N3 O2' 
_chemical_formula_weight          297.24 
 
loop_ 
 _atom_type_symbol 
 _atom_type_description 
 _atom_type_scat_dispersion_real 
 _atom_type_scat_dispersion_imag 
 _atom_type_scat_source 
 'C'  'C'   0.0181   0.0091 
 'International Tables Vol C Tables 4.2.6.8 and 6.1.1.4' 
 'H'  'H'   0.0000   0.0000 
 'International Tables Vol C Tables 4.2.6.8 and 6.1.1.4' 
 'N'  'N'   0.0311   0.0180 
 'International Tables Vol C Tables 4.2.6.8 and 6.1.1.4' 
 'O'  'O'   0.0492   0.0322 
 'International Tables Vol C Tables 4.2.6.8 and 6.1.1.4' 
 'F'  'F'   0.0727   0.0534 
 'International Tables Vol C Tables 4.2.6.8 and 6.1.1.4'  
 
_symmetry_cell_setting            monoclinic 
_symmetry_space_group_name_H-M    'P 21/c' 
_symmetry_space_group_name_Hall   '-P 2ybc'
 
loop_ 
 _symmetry_equiv_pos_as_xyz 
 'x, y, z' 
 '-x, y+1/2, -z+1/2' 
 '-x, -y, -z' 
 'x, -y-1/2, z-1/2'  
 
_cell_length_a                    16.2577(12) 
_cell_length_b                    10.7960(9) 
_cell_length_c                    7.2438(6) 
_cell_angle_alpha                 90.00 
_cell_angle_beta                  93.455(8) 
_cell_angle_gamma                 90.00 
_cell_volume                      1269.10(18) 
_cell_formula_units_Z             4 
_cell_measurement_temperature     90(2) 
_cell_measurement_reflns_used     2431 
_cell_measurement_theta_min       6.12 
_cell_measurement_theta_max       74.36 

_exptl_crystal_description        block 
_exptl_crystal_colour             yellow 
_exptl_crystal_size_max           0.8217 
_exptl_crystal_size_mid           0.6776 
_exptl_crystal_size_min           0.3005 
_exptl_crystal_density_meas       ? 
_exptl_crystal_density_diffrn     1.556 
_exptl_crystal_density_method     ? 
_exptl_crystal_F_000              608 
_exptl_absorpt_coefficient_mu     1.197 
_exptl_absorpt_correction_T_min   0.567 
_exptl_absorpt_correction_T_max   1.483 
_exptl_absorpt_correction_type    'gaussian' 
_exptl_absorpt_process_details    
;
CrysAlisPro, Oxford Diffraction Ltd., 
Version 1.171.34.36 (release 02-08-2010 CrysAlis171 .NET) 
(compiled Jan  5 2010,16:28:46) 
Analytical numeric absorption correction using a multifaceted crystal 
model based on expressions derived by R.C. Clark & J.S. Reid. 
(Clark, R. C. & Reid, J. S. (1995). Acta Cryst. A51, 887-897) 
; 

_diffrn_ambient_temperature       90(2)
_diffrn_radiation_wavelength      1.5418
_diffrn_radiation_type            'Cu K\a'
_diffrn_radiation_source          'SuperNova (Cu) X-ray Source'
_diffrn_radiation_monochromator   'mirror'
_diffrn_measurement_device_type   'SuperNova, Single source at offset), Atlas'
_diffrn_measurement_method        '\w scans'
_diffrn_detector_area_resol_mean  10.3613
_diffrn_standards_number          0
_diffrn_standards_interval_count  .
_diffrn_standards_decay_%         0
_diffrn_reflns_number             4283 
_diffrn_reflns_av_R_equivalents   0.0180 
_diffrn_reflns_av_sigmaI/netI     0.0193 
_diffrn_reflns_limit_h_min        -20 
_diffrn_reflns_limit_h_max        19 
_diffrn_reflns_limit_k_min        -13 
_diffrn_reflns_limit_k_max        8 
_diffrn_reflns_limit_l_min        -8 
_diffrn_reflns_limit_l_max        8 
_diffrn_reflns_theta_min          6.83 
_diffrn_reflns_theta_max          74.53 
_reflns_number_total              2453 
_reflns_number_gt                 2283 
_reflns_threshold_expression      I>2\s(I) 
 
_computing_data_collection       
;
CrysAlisPro, Oxford Diffraction Ltd.,
Version 1.171.34.36 (release 02-08-2010 CrysAlis171 .NET)
(compiled Nov  6 2009,16:24:50)
; 
_computing_cell_refinement       
;
CrysAlisPro, Oxford Diffraction Ltd.,
Version 1.171.34.36 (release 02-08-2010 CrysAlis171 .NET)
(compiled Nov  6 2009,16:24:50)
; 
_computing_data_reduction        
;
CrysAlisPro, Oxford Diffraction Ltd.,
Version 1.171.34.36 (release 02-08-2010 CrysAlis171 .NET)
(compiled Nov  6 2009,16:24:50)
; 
_computing_structure_solution    'smtbx-flip (Bourhis, 2008)'  
_computing_structure_refinement  'SHELXL97 (Sheldrick, 2008)' 
_computing_molecular_graphics    ' ? ' 
_computing_publication_material  'enCIFer(Allen et al.,2004);PLATON(Spek,2003)' 

_refine_ls_structure_factor_coef  Fsqd  
_refine_ls_matrix_type            full 
_refine_ls_weighting_scheme       calc  
_refine_ls_weighting_details      
'calc w=1/[\s^2^(Fo^2^)+(0.0532P)^2^+0.8705P] where P=(Fo^2^+2Fc^2^)/3'
_atom_sites_solution_primary      other 
_atom_sites_solution_secondary    difmap 
_atom_sites_solution_hydrogens    geom
_refine_ls_hydrogen_treatment     constr
_refine_ls_extinction_method      none 
_refine_ls_extinction_coef        ?  
_refine_ls_number_reflns          2453 
_refine_ls_number_parameters      191 
_refine_ls_number_restraints      0 
_refine_ls_R_factor_all           0.0416 
_refine_ls_R_factor_gt            0.0387 
_refine_ls_wR_factor_ref          0.1046 
_refine_ls_wR_factor_gt           0.1028 
_refine_ls_goodness_of_fit_ref    1.060 
_refine_ls_restrained_S_all       1.060 
_refine_ls_shift/su_max           0.001 
_refine_ls_shift/su_mean          0.000 
 
loop_ 
 _atom_site_label 
 _atom_site_type_symbol 
 _atom_site_fract_x 
 _atom_site_fract_y 
 _atom_site_fract_z 
 _atom_site_U_iso_or_equiv 
 _atom_site_adp_type 
 _atom_site_occupancy 
 _atom_site_symmetry_multiplicity 
 _atom_site_calc_flag 
 _atom_site_refinement_flags 
 _atom_site_disorder_assembly 
 _atom_site_disorder_group 
N1 N 0.79758(8) 0.27772(12) 1.04601(18) 0.0155(3) Uani 1 1 d . . . 
N2 N 0.87443(8) 0.28040(12) 0.99370(17) 0.0149(3) Uani 1 1 d . . . 
C3 C 0.89679(9) 0.37287(13) 0.88250(19) 0.0119(3) Uani 1 1 d . . . 
N4 N 0.84410(8) 0.45537(11) 0.80151(17) 0.0127(3) Uani 1 1 d . . . 
C5 C 0.76756(9) 0.44918(14) 0.8501(2) 0.0135(3) Uani 1 1 d . . . 
C6 C 0.74421(9) 0.36399(14) 0.9826(2) 0.0141(3) Uani 1 1 d . . . 
C7 C 0.98492(9) 0.38138(13) 0.84484(19) 0.0120(3) Uani 1 1 d . . . 
C8 C 1.04117(9) 0.29469(14) 0.9209(2) 0.0137(3) Uani 1 1 d . . . 
H8 H 1.0230 0.2306 0.9985 0.016 Uiso 1 1 calc R . . 
C9 C 1.12347(9) 0.30271(15) 0.8825(2) 0.0154(3) Uani 1 1 d . . . 
H9 H 1.1616 0.2431 0.9326 0.019 Uiso 1 1 calc R . . 
C10 C 1.15063(9) 0.39747(15) 0.7714(2) 0.0152(3) Uani 1 1 d . . . 
H10 H 1.2071 0.4023 0.7454 0.018 Uiso 1 1 calc R . . 
C11 C 1.09519(9) 0.48518(14) 0.6982(2) 0.0152(3) Uani 1 1 d . . . 
H11 H 1.1138 0.5504 0.6232 0.018 Uiso 1 1 calc R . . 
C12 C 1.01235(9) 0.47716(14) 0.7351(2) 0.0135(3) Uani 1 1 d . . . 
H12 H 0.9744 0.5371 0.6854 0.016 Uiso 1 1 calc R . . 
C13 C 0.70861(9) 0.53882(15) 0.7489(2) 0.0168(3) Uani 1 1 d . . . 
F1 F 0.72760(6) 0.55392(11) 0.57505(14) 0.0296(3) Uani 1 1 d . . . 
F2 F 0.71082(6) 0.65027(9) 0.82972(16) 0.0293(3) Uani 1 1 d . . . 
F3 F 0.63062(5) 0.49901(9) 0.74527(13) 0.0206(2) Uani 1 1 d . . . 
C14 C 0.66297(9) 0.35887(15) 1.0716(2) 0.0161(3) Uani 1 1 d . . . 
O1 O 0.62423(7) 0.26577(11) 1.09034(18) 0.0255(3) Uani 1 1 d . . . 
O2 O 0.64400(6) 0.47134(10) 1.13228(15) 0.0176(3) Uani 1 1 d . . . 
C15 C 0.56870(10) 0.48077(16) 1.2320(2) 0.0210(4) Uani 1 1 d . . . 
H15A H 0.5747 0.4344 1.3499 0.025 Uiso 1 1 calc R . . 
H15B H 0.5213 0.4462 1.1566 0.025 Uiso 1 1 calc R . . 
C16 C 0.55554(10) 0.61615(17) 1.2683(3) 0.0254(4) Uani 1 1 d . . . 
H16A H 0.5501 0.6609 1.1504 0.038 Uiso 1 1 calc R . . 
H16B H 0.6027 0.6489 1.3436 0.038 Uiso 1 1 calc R . . 
H16C H 0.5052 0.6270 1.3344 0.038 Uiso 1 1 calc R . . 
 
loop_ 
 _atom_site_aniso_label 
 _atom_site_aniso_U_11 
 _atom_site_aniso_U_22 
 _atom_site_aniso_U_33 
 _atom_site_aniso_U_23 
 _atom_site_aniso_U_13 
 _atom_site_aniso_U_12 
N1 0.0136(6) 0.0156(6) 0.0176(6) 0.0008(5) 0.0042(5) -0.0002(5) 
N2 0.0128(6) 0.0152(6) 0.0171(6) 0.0014(5) 0.0042(5) -0.0005(5) 
C3 0.0135(7) 0.0118(7) 0.0106(6) -0.0021(5) 0.0020(5) -0.0003(5) 
N4 0.0123(6) 0.0132(6) 0.0128(6) -0.0014(5) 0.0023(4) 0.0000(5) 
C5 0.0129(7) 0.0139(7) 0.0140(7) -0.0023(5) 0.0023(5) -0.0009(6) 
C6 0.0130(7) 0.0138(7) 0.0156(7) -0.0019(5) 0.0028(5) -0.0007(6) 
C7 0.0126(7) 0.0133(7) 0.0102(7) -0.0023(5) 0.0026(5) -0.0004(5) 
C8 0.0157(7) 0.0140(7) 0.0116(7) -0.0005(5) 0.0032(5) -0.0004(6) 
C9 0.0137(7) 0.0185(8) 0.0141(7) -0.0003(6) 0.0008(5) 0.0018(6) 
C10 0.0115(7) 0.0206(8) 0.0138(7) -0.0033(6) 0.0028(5) -0.0025(6) 
C11 0.0172(7) 0.0161(7) 0.0128(7) -0.0018(5) 0.0038(5) -0.0043(6) 
C12 0.0154(7) 0.0136(7) 0.0116(7) -0.0009(5) 0.0013(5) -0.0001(6) 
C13 0.0113(7) 0.0172(8) 0.0221(8) 0.0022(6) 0.0033(6) -0.0013(6) 
F1 0.0178(5) 0.0469(7) 0.0246(5) 0.0187(5) 0.0049(4) 0.0069(5) 
F2 0.0223(5) 0.0147(5) 0.0497(7) 0.0000(4) -0.0063(4) 0.0041(4) 
F3 0.0090(4) 0.0261(5) 0.0266(5) 0.0040(4) 0.0008(3) -0.0013(4) 
C14 0.0137(7) 0.0190(8) 0.0158(7) 0.0018(6) 0.0031(5) -0.0006(6) 
O1 0.0205(6) 0.0196(6) 0.0376(7) -0.0001(5) 0.0127(5) -0.0056(5) 
O2 0.0122(5) 0.0188(6) 0.0226(6) -0.0013(4) 0.0079(4) 0.0005(4) 
C15 0.0123(7) 0.0287(9) 0.0229(8) -0.0030(7) 0.0086(6) 0.0005(6) 
C16 0.0147(7) 0.0296(9) 0.0324(9) -0.0089(7) 0.0062(6) 0.0026(7) 
 
_geom_special_details 
; 
 All esds (except the esd in the dihedral angle between two l.s. planes) 
 are estimated using the full covariance matrix.  The cell esds are taken 
 into account individually in the estimation of esds in distances, angles 
 and torsion angles; correlations between esds in cell parameters are only 
 used when they are defined by crystal symmetry.  An approximate (isotropic) 
 treatment of cell esds is used for estimating esds involving l.s. planes. 
;
loop_ 
 _geom_bond_atom_site_label_1 
 _geom_bond_atom_site_label_2 
 _geom_bond_distance 
 _geom_bond_site_symmetry_2 
 _geom_bond_publ_flag 
N1 N2 1.3275(17) . ? 
N1 C6 1.336(2) . ? 
N2 C3 1.3464(19) . ? 
C3 N4 1.346(2) . ? 
C3 C7 1.4775(19) . ? 
N4 C5 1.3151(19) . ? 
C5 C6 1.398(2) . ? 
C5 C13 1.519(2) . ? 
C6 C14 1.506(2) . ? 
C7 C12 1.394(2) . ? 
C7 C8 1.398(2) . ? 
C8 C9 1.385(2) . ? 
C8 H8 0.9500 . ? 
C9 C10 1.390(2) . ? 
C9 H9 0.9500 . ? 
C10 C11 1.390(2) . ? 
C10 H10 0.9500 . ? 
C11 C12 1.392(2) . ? 
C11 H11 0.9500 . ? 
C12 H12 0.9500 . ? 
C13 F1 1.3249(19) . ? 
C13 F2 1.3375(19) . ? 
C13 F3 1.3376(17) . ? 
C14 O1 1.198(2) . ? 
C14 O2 1.3337(19) . ? 
O2 C15 1.4619(17) . ? 
C15 C16 1.503(2) . ? 
C15 H15A 0.9900 . ? 
C15 H15B 0.9900 . ? 
C16 H16A 0.9800 . ? 
C16 H16B 0.9800 . ? 
C16 H16C 0.9800 . ? 
 
loop_ 
 _geom_angle_atom_site_label_1 
 _geom_angle_atom_site_label_2 
 _geom_angle_atom_site_label_3 
 _geom_angle 
 _geom_angle_site_symmetry_1 
 _geom_angle_site_symmetry_3 
 _geom_angle_publ_flag 
N2 N1 C6 119.32(13) . . ? 
N1 N2 C3 118.66(12) . . ? 
N4 C3 N2 124.33(13) . . ? 
N4 C3 C7 118.51(13) . . ? 
N2 C3 C7 117.15(13) . . ? 
C5 N4 C3 115.94(13) . . ? 
N4 C5 C6 121.16(14) . . ? 
N4 C5 C13 114.73(13) . . ? 
C6 C5 C13 124.10(13) . . ? 
N1 C6 C5 119.82(13) . . ? 
N1 C6 C14 113.30(13) . . ? 
C5 C6 C14 126.86(14) . . ? 
C12 C7 C8 119.81(13) . . ? 
C12 C7 C3 119.90(13) . . ? 
C8 C7 C3 120.28(13) . . ? 
C9 C8 C7 119.73(14) . . ? 
C9 C8 H8 120.1 . . ? 
C7 C8 H8 120.1 . . ? 
C8 C9 C10 120.42(14) . . ? 
C8 C9 H9 119.8 . . ? 
C10 C9 H9 119.8 . . ? 
C11 C10 C9 120.06(14) . . ? 
C11 C10 H10 120.0 . . ? 
C9 C10 H10 120.0 . . ? 
C10 C11 C12 119.81(14) . . ? 
C10 C11 H11 120.1 . . ? 
C12 C11 H11 120.1 . . ? 
C11 C12 C7 120.16(14) . . ? 
C11 C12 H12 119.9 . . ? 
C7 C12 H12 119.9 . . ? 
F1 C13 F2 107.68(13) . . ? 
F1 C13 F3 107.19(13) . . ? 
F2 C13 F3 107.34(12) . . ? 
F1 C13 C5 111.14(12) . . ? 
F2 C13 C5 111.26(13) . . ? 
F3 C13 C5 112.00(12) . . ? 
O1 C14 O2 126.36(14) . . ? 
O1 C14 C6 124.06(14) . . ? 
O2 C14 C6 109.51(12) . . ? 
C14 O2 C15 116.32(12) . . ? 
O2 C15 C16 106.65(13) . . ? 
O2 C15 H15A 110.4 . . ? 
C16 C15 H15A 110.4 . . ? 
O2 C15 H15B 110.4 . . ? 
C16 C15 H15B 110.4 . . ? 
H15A C15 H15B 108.6 . . ? 
C15 C16 H16A 109.5 . . ? 
C15 C16 H16B 109.5 . . ? 
H16A C16 H16B 109.5 . . ? 
C15 C16 H16C 109.5 . . ? 
H16A C16 H16C 109.5 . . ? 
H16B C16 H16C 109.5 . . ? 
 
loop_ 
 _geom_torsion_atom_site_label_1 
 _geom_torsion_atom_site_label_2 
 _geom_torsion_atom_site_label_3 
 _geom_torsion_atom_site_label_4 
 _geom_torsion 
 _geom_torsion_site_symmetry_1 
 _geom_torsion_site_symmetry_2 
 _geom_torsion_site_symmetry_3 
 _geom_torsion_site_symmetry_4 
 _geom_torsion_publ_flag 
C6 N1 N2 C3 2.1(2) . . . . ? 
N1 N2 C3 N4 -8.4(2) . . . . ? 
N1 N2 C3 C7 173.02(12) . . . . ? 
N2 C3 N4 C5 6.2(2) . . . . ? 
C7 C3 N4 C5 -175.30(12) . . . . ? 
C3 N4 C5 C6 2.0(2) . . . . ? 
C3 N4 C5 C13 -176.91(12) . . . . ? 
N2 N1 C6 C5 5.5(2) . . . . ? 
N2 N1 C6 C14 -172.80(12) . . . . ? 
N4 C5 C6 N1 -7.8(2) . . . . ? 
C13 C5 C6 N1 170.97(14) . . . . ? 
N4 C5 C6 C14 170.28(14) . . . . ? 
C13 C5 C6 C14 -10.9(2) . . . . ? 
N4 C3 C7 C12 3.2(2) . . . . ? 
N2 C3 C7 C12 -178.16(13) . . . . ? 
N4 C3 C7 C8 -177.66(13) . . . . ? 
N2 C3 C7 C8 1.0(2) . . . . ? 
C12 C7 C8 C9 -1.7(2) . . . . ? 
C3 C7 C8 C9 179.15(13) . . . . ? 
C7 C8 C9 C10 1.0(2) . . . . ? 
C8 C9 C10 C11 0.2(2) . . . . ? 
C9 C10 C11 C12 -0.6(2) . . . . ? 
C10 C11 C12 C7 -0.1(2) . . . . ? 
C8 C7 C12 C11 1.3(2) . . . . ? 
C3 C7 C12 C11 -179.59(13) . . . . ? 
N4 C5 C13 F1 35.49(18) . . . . ? 
C6 C5 C13 F1 -143.37(15) . . . . ? 
N4 C5 C13 F2 -84.50(16) . . . . ? 
C6 C5 C13 F2 96.65(17) . . . . ? 
N4 C5 C13 F3 155.35(13) . . . . ? 
C6 C5 C13 F3 -23.5(2) . . . . ? 
N1 C6 C14 O1 -47.9(2) . . . . ? 
C5 C6 C14 O1 133.93(18) . . . . ? 
N1 C6 C14 O2 129.26(14) . . . . ? 
C5 C6 C14 O2 -48.9(2) . . . . ? 
O1 C14 O2 C15 0.3(2) . . . . ? 
C6 C14 O2 C15 -176.70(12) . . . . ? 
C14 O2 C15 C16 -174.17(14) . . . . ? 

_diffrn_measured_fraction_theta_max    0.941 
_diffrn_reflns_theta_full              67.50 
_diffrn_measured_fraction_theta_full   0.986 
_refine_diff_density_max    0.342
_refine_diff_density_min   -0.321 
_refine_diff_density_rms    0.053 
